# Supplementary material
Source: PubMed Central journal article supplement (PMC2787167)

## Supporting Information

**Simon *et al.* – Recent assembly of the Cerrado, a neotropical plant diversity hotspot, by in situ evolution of adaptations to fire**

Contents:

- 1) STUDY GROUPS
- 2) PHYLOGENETIC AND DATING ANALYSIS  
Supporting Table S1
- 3) OPTIMIZATION ANALYSIS  
Supporting Table S2
- 4) DESCRIPTION OF 15 CERRADO LINEAGES
- 5) EVIDENCE FROM OTHER GROUPS  
Supporting Table S3

Supporting References

Appendices S1-4: Species sampled, voucher information and GenBank accession numbers for the *Mimosa*, *Andira*, *Lupinus* and Microlicieae datasets.

Supporting figures

- Fig. S1
- Fig. S2
- Fig. S3
- Fig. S4

## 1) STUDY GROUPS

### *Mimosa* dataset

Taxon sampling: *Mimosa* (Mimosoideae, Leguminosae) is a large genus of some 530 described species, distributed mainly in the Neotropics with around 40 species occurring in the Old World. *Mimosa* is remarkably rich in fire-adapted narrow endemics in the Cerrado, but at the same time also highly diverse in other major Neotropical habitats such as seasonally dry tropical forest, subtropical grasslands, and rain forest. More than a quarter of *Mimosa* species grow only in the Cerrado and nowhere else (1), and it is the second largest genus in this biome (2). Two-hundred and fifty species were sampled to span the full range of morphological diversity and as wide a coverage of geography and ecology as possible, including all five sections and 37 of 41 series proposed in Barneby's infrageneric classification (3), plus half of the Old World species (these not included in Barneby's monograph), and 13 outgroups (Appendix S1). For some species, multiple accessions were included. Nearly half of the species listed for the Cerrado (1) were sampled (92 out of 189), most of these being narrow endemics adapted to frequent fires.

Molecular methods: Total DNA from silica-dried leaves or herbarium material was isolated using DNeasy Plant Mini Kit (Qiagen Ltd., Dorking, Surrey, UK). After an initial screening of 10 plastid regions, the *trnD-trnT* spacer was selected as the most reliable and variable DNA sequence locus. The *trnD-trnT* region was amplified using external and internal primers from (4), except for an additional forward primer trnD2 (GTG TAC AGC ATG CAT ATT CTT ACG), which was designed for this study. For most samples the *trnD-trnT* locus was amplified in a single PCR reaction. For highly degraded DNA templates, amplifications were performed using internal primers trnE and trnY, and sometimes the newly designed primer trnT2 (GAC GTA TCG CCG AGT AAT TCC). Reactions were carried out in a total volume of 25 µl containing ~5-20 ng of DNA template, 1X Buffer, 0.5 M of betaine, 1.5 mM of MgCl<sub>2</sub>, 0.1 mM of each dNTP, 0.5 µM of each primer and 0.6 U of *Taq* polymerase (Yorkshire Bioscience, York, UK). PCR conditions were 94°C for 45 sec, 30 cycles of 45 sec at 94°C, 1 min at 55°C and 1 min at 72°C, followed by a final extension of 5 min at 72°C. PCR products were purified using exonuclease I and shrimp alkaline phosphatase (Exo/SAP) and sequenced in four reactions using the two PCR primers and two internal primers, using Big Dye chemistry (Applied Biosystems, Foster City, CA, USA). Consensus sequences from the four strands were assembled using Sequencher software (GeneCodes Corp., Ann Arbor, MI), and then aligned in ClustalX (5) and manually edited using BioEdit (6). The final dataset contained 2226 bp, after exclusion of 140 bp of ambiguous alignment. A total of 614 variable characters were found, 368 (16.5%) of them parsimony informative, 334 (15.0%) considering only the ingroup. A number of informative indels were also found in the dataset, but these were not used in the Bayesian analysis. GenBank accession numbers for *trnD-trnT* sequences of *Mimosa* and voucher information are given in Appendix S1.

### *Andira* dataset

Taxon sampling: *Andira* is a mostly Neotropical legume genus comprising 29 species of trees and shrubs, with only *A. inermis* occurring outside of the Neotropics, in Africa (7). Four species grow in fire prone habitats in the Cerrado: *A. cujabensis*, *A. cordata*, *A. vermifuga*, and *A. humilis*. Of these, *A. cordata* and *A. cujabensis* are endemic to the Cerrado, and *A. vermifuga* also occurs sporadically in the Amazon and gallery forests. *Andira humilis* occurs mostly in the Cerrado, but also in other open fire prone vegetation. The dataset includes 25 species of *Andira* (42 accessions) and utilizes the genus *Hymenolobium* as an outgroup (five spp. represented). The inclusion of *Andira* in this study of Cerrado origins is relevant since it is one of many examples of tree genera which are predominantly found in the rain forest but contain a few species in the Cerrado (others include *Annona*, *Caryocar*, *Jacaranda*, *Palicourea*, *Qualea*, and *Vochysia*; 8, 9).

Molecular methods: A molecular dataset based on the 5.8S subunit and flanking internal transcribed spacers *ITS1* and *ITS2* of nuclear ribosomal DNA was generated by Skema (10) and is published here for the first time. Total DNA from fresh leaf material, herbarium specimens, or from leaves dried in silica gel or anhydrous calcium sulfate was extracted following the CTAB method (11). Each region was amplified from the 3' end of 18S through *ITS1* through 5.8S through *ITS2* to the 5' end of 25S using the primers *ITS 5P* and *ITS 8P* (12). For three accessions using leaf material from herbarium specimens (*A. praecox*, *A. tervequinata*, *A. trifoliolata*) this primary PCR reaction did not achieve sufficient amplification, therefore a

nested PCR was carried out using the internal primers ITS 1 and ITS 4 (13) with roughly 0.25  $\mu$ L of unpurified, primary PCR reaction for the DNA template. Bioline Taq and reagents (Bioline, London NW2, UK) were used for all PCR reactions in the following amounts: ~5-20 ng of DNA template, 5  $\mu$ L of Bioline 10X  $\text{NH}_4$  buffer, 200  $\mu$ M each dNTPs, 2.5 mM  $\text{MgCl}_2$ , 0.3  $\mu$ M of each primer, 1.25 U of BioTaq and distilled sterile water to 50  $\mu$ L total volume. The ITS PCR conditions were 3 min at 94°C, followed by 30 cycles of 1 min at 94°C, 1 min at 55°C, 1.5 min at 72°C, finished by a final extension of 5 min at 72°C. PCR products were purified using the QIAGEN PCR Purification Kit according to manufacturer's instructions (Qiagen Ltd., Dorking, Surrey, UK). Sequencing was completed using Thermosequenase II chemistry (Amersham Pharmacia, Buckinghamshire, UK) and primarily the same primers as used for amplification, except in some instances where ITS3P, its reverse, or ITS2G (12) were also used. Sequences were viewed using Sequence Navigator (Applied Biosystems, Foster City, CA, USA) and consensus sequences were manually assembled and edited. Taxa with multiple copies of ITS were included in the dataset only when sequences of the paralogues could be deduced without cloning (*i.e.* those accessions which had only one insertion-deletion). The final dataset contained 745 bp of which 20% were variable and 13% parsimony informative as well as 14 indels of which five were parsimony informative but not used in the Bayesian analysis. GenBank accession numbers for the ITS sequences and voucher information are given in Appendix S2.

### **Lupinus dataset**

*Lupinus* is a predominantly New World genus with around 275 species of herbs and woody perennials. The major centres of diversity are the Andes in South America and the Rocky Mountains in North America. A total of 11 species grow in the Cerrado, mostly at higher elevation sites, and eight of them are Cerrado endemics (14, 15). The other three extend their ranges to southern Brazil, Uruguay and Argentina. Two other species, *L. ovalifolius* and *L. pouvensalanus* known only from the type collections from Minas Gerais (Brazil), could potentially also occur in the Cerrado, but the precise details of these records are unknown. We used a concatenated dataset of the 5.8S subunit and flanking internal transcribed spacers *ITS1* and *ITS2* and sequences of one copy (*LEGCYCIA*) of the *CYCLOIDEA*-like *LEGCYCI* regulatory nuclear gene (2028 bp) from Hughes & Eastwood (16), which contained 98 species (140 accessions), including five Cerrado species (*L. crotalarioides*, *L. guaraniticus*, *L. parvifolius*, *L. subsessilis* and *L. velutinus*), and eight outgroups.

### **Microlicieae dataset**

The tribe Microlicieae in the Melastomataceae has been redefined to exclude *Eriocnema*, *Siphanthera*, *Castratella* and *Cambessedesia*, and most recent accounts recognize the core Microlicieae (referred here as Microlicieae) comprising 6 genera and 275-300 species, with approximately 90% of them endemic to the Cerrado (17, 18). This clade is formed by *Microlicia* (ca. 130 species), *Lavoisiera* (46), *Rhyncanthera* (15), *Chaetostoma* (11), *Trembleya* (18) and *Stenodon* (2), and grows in a broad variety of habitats, but are particularly rich in high altitude *campo rupestre* vegetation (17-22; Karina Silva, pers. comm.), a fire-prone habitat in which fire frequency depends on the density of grasses and herbs. Taxonomic uncertainty in this group is evident, particularly within *Microlicia*, the largest genus of Microlicieae, which is poorly understood taxonomically (18).

The analysis of the Cerrado Microlicieae was based on previous family level phylogenies of the Melastomataceae using three plastid loci (*rbcL*, *rpl16* and *ndhF*) containing 34 species and 2 outgroups (18, 23). Another 23 published *rpl16* sequences of Microlicieae (18) were added to the matrix in order to increase taxon sampling and the accuracy of divergence time estimates. The *rbcL* and *ndhF* partitions not sampled for the 23 species of Microlicieae were treated as missing data. The final dataset contained a total of 59 species and 3498 bp. Sampling in this clade is low (around 12%), but at least two species of the largest genera within Microlicieae have been sampled.

## **2) PHYLOGENETIC AND DATING ANALYSIS**

### **Estimating the ages of legume lineages**

**Molecular Dataset:** Sequences of the chloroplast gene *matK* and flanking *trnK* introns when available for the Leguminosae were obtained from published work and unpublished sequences deposited in GenBank (24–30). Most of these sequences were amplified using primers *trnK685F* and *trnK2R* (see ref. 24 for references), which covers the *matK* gene and part of the *trnK* intron. When available, sequences of the flanking non-coding portion of the *trnK* intron were included to improve resolution, particularly within the mimosoids which have slow rates of DNA evolution among the legumes (25). As a consequence, most sequences (689) in our dataset have this region (ca. 1100 bp) missing from the data matrix. The final aligned dataset contained 2979 bp for 829 legumes representing 400 genera, plus 10 outgroups.

**Fossil calibration:** The legume family represents an excellent group for molecular dating analysis because it has an abundant fossil record that is highly detectable (25, 31). By using most of the fossil constraints from previous analyses of legume divergence (24, 25) with the addition of two mimosoid fossils, and increasing taxon sampling with the addition of 101 published mimosoid sequences (26, 30, 32), the age of nodes of interest could be better estimated. A list of the 23 fossil calibration points used to constrain nodes in the legume phylogeny is given in Table S1. All fossils were defined as minimum age constraints and implemented in the dating analysis as a lognormal statistical distribution, which is an adequate prior to take account of the incompleteness of the fossil record (33, 34). One exception was fossil A, which sets a boundary between 60–70 Mya for the legume stem node based on a conservative interpretation of the early legume fossil record (25). Age estimates obtained in this analysis provided the basis for understanding the timing of diversification of particular groups of interest (*Mimosa*, *Andira* and *Lupinus*) that were used as secondary calibrations in subsequent dating analysis of Cerrado lineages.

Previous legume divergence studies (24, 25), though usually congruent regarding their interpretation of fossils, disagreed on the placement and reliability of a few specific fossils. The following paragraphs explain our interpretation, use, or omission of various fossils from these previous studies (24, 25) and introduce two new mimosoid fossils previously described which are here included as additional age constraints.

A 60 Mya fossil wood with vested pits from Mali was used to constrain the legume crown node in Bruneau *et al.* (24). Vested pits are a typical anatomical characteristic of legume wood, although absent in some groups. Because of the problematic placement of this fossil given the ambiguity in the optimization of this character onto the phylogeny, we preferred not to include it in our analysis. In any case, our results should not be affected by excluding this fossil wood from the analysis as the age estimate for the legume crown node was consistently older than 60 Mya (see results below), even without a minimum age constraint on this node. Fossil P, a *Caesalpinia* s.s. fossil used by Bruneau *et al.* (24) was also discarded from our analysis because it is redundant, given that another calibration point (fossil O) nested within the *Caesalpinia* clade imposes the same minimum age constraint. The winged dehiscent fossil pods attributed to *Acrocarpus* were discarded by Lavin *et al.* (25) as lacking diagnostic apomorphies. However, we included it as a calibration point in our analysis (fossil M) following the interpretation of Bruneau *et al.* (24).

One of the earliest macrofossils attributed to the mimosoids are the fossil flowers *Protomimosoidea buchanensis* described from the Paleocene-Eocene boundary (55 Mya) of North America (35). These authors argued that these magnificent fossils provide the earliest unequivocal evidence for mimosoids, with several characters that are thought to be plesiomorphic within the mimosoids, such as spicate inflorescences, actinomorphic bisexual flowers, valvate petal aestivation, tubular stigmas, and ten exerted free stamens clearly visible. This fossil was used by Lavin *et al.* (25) to calibrate the stem node of the mimosoids. However, Crepet & Taylor (35) pointed out the affinities of *P. buchanensis* to members of the Dimorphandra group, traditionally placed in the Caesalpinioideae, since they have similar characters such as sagitate anthers, uneven stamen lengths and distinctive pollen morphology and ultrastructure. This would lead to the possibility of using this fossil to constrain the base of the Dimorphandra group. However, because the Dimorphandra group has now been shown to be polyphyletic (24), this makes placement of this fossil uncertain. One possibility would be to place this fossil at the most recent common ancestor (mrca) of the two clades of the Dimorphandra group, which coincides with node 10 in Bruneau *et al.* (24). These authors argued that this option is preferable and more conservative because this fossil shares characteristics of both mimosoids and caesalpinioideae and we have followed that approach here. This was designated as fossil F2.

**Table S1.** Fossils used to calibrate nodes in the legume dating analysis. Letters used to designate the calibration points follow those of Bruneau *et al.* (24). Calibration points used only in Lavin *et al.* (25) have the digit “2” added after the letter. See these references (24, 25) for original fossil descriptions and further discussion of fossils.

| Name | Fossil                                                                 | Age (Mya) | Node constrained                                                      | Reference |
|------|------------------------------------------------------------------------|-----------|-----------------------------------------------------------------------|-----------|
| A    | early fossil record of Leguminosae                                     | 60-70     | Legume stem node                                                      | (25)      |
| C    | <i>Cercis</i> leaves and pod                                           | 34        | <i>Cercis</i> stem node                                               | (24, 25)  |
| D    | <i>Bauhinia</i> s.l.                                                   | 46        | <i>Bauhinia</i> stem node                                             | (24)      |
| E    | <i>Hymenaea</i> flower in amber                                        | 24        | <i>Hymenaea</i> stem node                                             | (24, 25)  |
| F    | <i>Prioria</i> flowers in amber                                        | 24        | mrca of <i>Prioria</i> and<br><i>Oxystigma</i>                        | (24)      |
| F2   | <i>Protomimosoidea buchanaensis</i><br>flowers                         | 55        | mrca of clades of<br>Dimorphandra group                               | (24, 25)  |
| G    | <i>Daniellia</i> wood in amber                                         | 53        | <i>Daniellia</i> stem node                                            | (24)      |
| H    | <i>Aphanocalyx</i> leaves                                              | 46        | <i>Aphanocalyx</i> stem node                                          | (24)      |
| I    | <i>Crudia</i> fruits and leaflets                                      | 45        | <i>Crudia</i> stem node                                               | (24)      |
| I2   | <i>Styphnolobium</i> and <i>Cladrastis</i> fruits<br>and leaves        | 40        | Stem node leading to<br><i>Styphnolobium</i> and<br><i>Cladrastis</i> | (25)      |
| J    | <i>Barnebyanthus buchanaensis</i><br>flowers                           | 55        | Papilionoideae stem node                                              | (24, 25)  |
| J2   | leaves and pods similar to<br><i>Bowdichia</i> and <i>Diploptropis</i> | 56        | Genistoid crown node                                                  | (25)      |
| K    | <i>Swartzia</i> fruits and leaflets                                    | 45        | <i>Swartzia</i> stem node                                             | (24)      |
| K2   | <i>Machaerium</i> leaflets                                             | 40        | <i>Machaerium</i> stem node                                           | (25)      |
| L    | “ <i>Prosopis linearifolia</i> ” leaves                                | 34        | <i>Arcoa</i> stem node                                                | (24, 25)  |
| L2   | <i>Tipuana</i> fruits                                                  | 10        | mrca of <i>Tipuana</i> and<br><i>Maraniona</i>                        | (25)      |
| M    | <i>Acrocarpus</i> fruit                                                | 45        | mrca of <i>Acrocarpus</i> and<br><i>Ceratonia</i>                     | (24)      |
| M2   | <i>Robinia zirkelii</i> wood                                           | 34        | <i>Robinia</i> stem node                                              | (25)      |
| N    | <i>Senna</i> fruits                                                    | 45        | <i>Senna</i> stem node                                                | (24)      |
| O    | <i>Mezoneuron</i> fruits                                               | 45        | <i>Caesalpinia</i> (subgen.<br><i>Mezoneuron</i> ) stem node          | (24, 25)  |
| Q    | Ingeae / Acacieae fossil pollen                                        | 45        | mrca of Acacieae / Ingeae                                             | See text  |
| R    | <i>Eumimosoidea plumosa</i> flowers,<br>leaves and fruits              | 45        | <i>Dinizia</i> stem node                                              | (24)      |
| X    | <i>Calliandra</i> pollen                                               | 16        | <i>Calliandra</i> stem node                                           | (36)      |

Other relevant early mimosoid fossils are the Eocene flowers, leaves and fruits of *Eumimosoidea plumosa*, first described by Crepet & Dilcher (37) from Tennessee (USA), and later found at other localities in North America (38). These fossils were interpreted as an extinct mimosoid genus with flowers similar to the extant genera *Dinizia* and *Fillaeopsis*, which also have pollen arranged in tetrads (38). Although not included by Lavin *et al.* (25), this fossil was used to constrain the *Dinizia* stem node (*Dinizia* plus a set of sequences labelled “Folli”, in reference to the collector of a new taxon close to *Dinizia*) by Bruneau *et al.* (24), and is interpreted here in the same way.

A fossil leaf described as *Acacia mahengense* from the Eocene of Tanzania (39) was used as a calibration point to constrain the *Acacia* s.l. stem node to a minimum age of 46 Mya in the analysis of Bruneau *et al.* (24). However, in consultation with mimosoid legume specialists (M. Luckow, G. Lewis, L. Rico, pers. comm.), we have concluded that there is not enough evidence to assign this fossil unequivocally to the genus *Acacia* s.l., given that many of its characteristics are shared by other mimosoids, or could belong to an extinct lineage. Hence, it was decided not to use this fossil as a constraint in the analysis. A much more convincing fossil is the *Acacia*-like flower preserved in Dominican Republic amber from the Oligocene-Miocene boundary (40), which shows apomorphic characters such as numerous stamens with free filaments each with an anther bearing a stalked gland and associated leaf pinnae bearing numerous small leaflets, all of which suggest affinities to *Acacia*. Lavin *et al.* (25) used the estimated age of this fossil to constrain the first branching lineage containing an *Acacia*, given that *Acacia*, as traditionally circumscribed is clearly

polyphyletic (30, 32, 41, 42). However, we have not used this 20 Mya fossil in the analysis as the same node was constrained by a significantly older fossil pollen that provided a minimum age of 45 Mya (see below).

Recent paleobotanical studies in Mexico (43, 44) have identified a number of Tertiary legume macrofossils (leaf and fruit fragments), and assigned them to extant genera, including the mimosoids *Inga*, *Mimosa*, *Lysiloma*, *Pithecellobium*, *Stryphnodendron*, *Piptadenia*, and *Prosopis*, along with several caesalpinioideae and papilionoideae. Despite the diversity and quality of these fossils, we consider many of the assignments to extant genera speculative and unjustified given the lack of diagnostic apomorphies, and none of them are compelling enough to include as fossil constraints. For example, the fossil *Inga* leaves described by Calvillo-Canadell & Cevallos-Ferriz (43) are doubtfully attributable to that genus given that one putative apomorphic character used to assign these leaves to *Inga*, the presence of extrafloral nectaries on the adaxial side of the leaf rachis is unconvincing as it is apparently the abaxial leaf surface that is visible. Furthermore, the leaflets are significantly smaller than any known modern *Inga* (T.D. Pennington, pers. comm.). There is no doubt that a diverse assemblage of legumes was present in the Oligocene of Mexico, but the identities of these diverse fossil assemblages in relation to extant groups remain, in most cases, very uncertain.

The two additional mimosoid fossil constraints used in our analysis came from the pollen record. Mimosoid pollen is frequently arranged in polyads, which are never found amongst Papilionoideae and are very rare in Caesalpinioideae, occurring in only a few caesalpinioideae genera in the form of tetrads (45). Many mimosoid polyad types possess particular characteristics that are diagnostic of major clades or even genera (46). Consequently, there is clear potential for the fossil pollen record, which is rich in mimosoids, to contribute to understanding the evolutionary history of the legumes, and to provide effective fossil constraints for mimosoid lineages. Many pollen types have been described from the fossil record and related to extant groups based on overall similarity. However, due to the great variation in pollen characters, they rarely reflect pollen characters at the generic level (47), and many specimens described are controversial or misinterpreted (48).

Of particular interest here is pollen ascribed to the Acacieae-Ingeae, which is very distinct from the rest of the Mimosoideae and easily identified by the presence of compound flattened polyads, grain heteromorphy, presence of internal pores and other diagnostic characters (46). The basic pollen type in these groups consists of flattened acalymated polyads containing 16 grains, usually arranged in 2 rows, but several other types also occur. The oldest fossils of this type of pollen date from the Eocene and have been recorded from sites in Brazil (*Polyadopollenites vancampoi*; ref. 49), Egypt (*Albizia* sp.; ref. 50), Colombia (*Acaciapollenites* sp.; ref. 51), Cameroon (*Polyadopollenites vancampoi*; ref. 52), but see Caccavari (53) for a critical discussion. Other records interpreted as *Acacia* polyads have also been reported from Eocene and younger sediments from Germany, Australia and New Zealand (see refs in Bruneau *et al.* (24). In modern mimosoids, similar circular polyads composed of 16 pollen grains with relatively large diameter are found in several extant taxa such as *Acacia* s.l. (subgenera *Acacia*, *Aculeiferum* and *Phyllodineae*), *Pithecellobium*, *Zapoteca*, *Albizia*, *Zygia* and *Cojoba* (46, 54-57).

Bruneau *et al.* (24) used an *Albizia* type fossil pollen from the Eocene of Egypt (50) to constrain the Ingeae stem node to a minimum age of 45 Mya in their analysis. However, the placement of this fossil is problematic, given that other pollen types sharing a similar set of characters also occur in *Acacia* s.l., thereby affecting the placement of this fossil constraint. The interpretation of these fossil pollen types is often difficult as there has been disagreement about the correct affinities to modern groups, especially between the tribes Acacieae and Ingeae. For example, the fossil pollen referred as *Acaciapollenites* sp. was referred as belonging to the 'Albizia group' by Guinet & Ferguson (47), whilst Caccavari (53) argued that it has greater affinities with *Acacia* pollen. This lack of agreement regarding fossil affinities and overlap in characteristics is not surprising given that neither of these tribes is monophyletic, with part of the Acacieae now known to be nested within the Ingeae (30, 41).

Adopting a more conservative approach, we assigned the origin of this Acacieae-Ingeae fossil polyad to the node equivalent to the most recent common ancestor of Acacieae and Ingeae. Hence, it is assumed that this characteristic type of pollen originated in this clade comprising the aforementioned groups. Consequently, the set of Eocene Acacieae-Ingeae fossil pollen mentioned above, which are the oldest known fossils for these two tribes, were used to constrain node Q in our analysis. By applying this calibration point to a relatively derived node within the mimosoids, the analysis is reconciled with evidence of Eocene fossils that

have been associated with other less derived mimosoid groups such as *Pentaclethra*, *Calpocalyx*, *Xylia*, *Adenanthera*, *Amblygonocarpus* and *Tetrapleura* (47, 50, 53). As a result, the potential for these fossils to constrain the age estimates is enhanced by choice of the Ingeae / Acaciae Eocene fossil pollen, as it provides a more rigorous constraint.

A second mimosoid node was constrained using fossil pollen belonging unequivocally to the genus *Calliandra* from the Middle Miocene of Argentina (36). This specimen has several diagnostic apomorphic characters of the very distinctive pollen of *Calliandra*, including eight grains arranged in a monoplanar, calymmated (a tectum common to all grains) polyad, where one of the cells is strongly modified into an appendix, giving the whole polyad a distinctive dissymmetric shape. This combination of features is unique among the mimosoids, and is believed to be highly specialized within *Calliandra* (46). More recently, Guinet & Hernandez (58) segregated *Calliandra* sensu stricto, which includes all Neotropical species with eight-grain polyads plus two species from Africa, from the remaining species with 16-grained polyads, which were either transferred to *Zapoteca* (Neotropics) or excluded from *Calliandra* (Old World species). Caccavari (36) argued that the Miocene fossil from Argentina represents a transitional form between two types of eight-grained polyad of extant *Calliandra* recognized by Guinet (59). The estimated age of this fossil is 16 Mya based on radiometric dating (see ref. 36), and was used to constrain the *Calliandra* stem node (node X in the phylogeny).

**Dating analysis:** A relaxed molecular clock approach was implemented in BEAST version 1.4.8 (60) to simultaneously estimate the legume phylogeny and divergence times. An initial tree that was compatible with the priors (age calibrations and group definitions) was specified in order to avoid problems with low likelihood at the start of the analysis as recommended by the program's manual. This initial tree had a topology and branch lengths (node ages) that were compatible with the priors defined, and was obtained as follows. An exploratory run on BEAST under the simplest model of nucleotide substitution with default settings and no fossil calibrations was used to generate an initial topology. This tree then was manipulated in TreeEdit (61) to make branch lengths (node heights) compatible with the constraints imposed by the minimum ages derived from the fossil calibration. This adjusted tree was then incorporated into a BEAST file as a tree block for the full analysis that included all fossil calibrations as described above. Twenty individual chains of  $10^7$  generations were performed, and after the exclusion of  $2 \times 10^6$  generations (burn-in from each chain), the results were combined. The final dated legume phylogeny showing the 23 calibration points and the nodes estimated for subsequent phylogenetic analyses of *Mimosa*, *Andira* and *Lupinus* is shown in Fig. S1.

Age estimates, both the mean and 95% credibility intervals (CI), for five nodes (obtained from the legume *matK* analyses) were used as calibration constraints for subsequent analyses of the individual legume datasets investigated here (*Mimosa*, *Andira* and *Lupinus*) using a normal statistical distribution prior, with mean and standard deviation set in order to approximate the corresponding estimate. For example, in the family-wide analysis, the age of *Mimosa* crown node was estimated as 24.0, with a 95% credibility interval of 18.1-30.6 Mya. This information (posterior) was provided as a calibration point (prior) in a subsequent analysis of a much more densely sampled *Mimosa* species dataset (*trnD-trnT*), using a normal distribution with mean 24.0 and a normal standard deviation of  $\pm 3.5$  Mya. These nodes (diamonds in Fig. S1) were selected based on a reasonable level of taxon sampling of these genera spanning the root node, and also to match corresponding nodes present in the more densely sampled species-level phylogenies. The points used for secondary calibration (squares in Fig. S2) are as following: 1) *Mimosa* dataset: *Mimosa* crown node (24.0 Mya, CI [18.0, 30.6]) and section *Mimadenia* crown node (16.6 Mya, CI [10.1, 23.6]); 2) *Andira* dataset: split between *Andira* and *Hymenolobium* (16.3 Mya, CI [5.4, 31.3]); 3) *Lupinus* dataset: *Lupinus* stem node (18.8 Mya, CI [11.9, 24.8]), and the crown node of the clade formed by *Genista*, *Spartium*, *Pterospartum*, *Retama* and *Stauracanthus* (12.8 Mya, CI [6.3-18.0]). The dating analysis for the Microlicieae of the Cerrado was time calibrated using three fossils following the work of Fritsch *et al.* (18). Analyses of the four individual study group datasets comprised three independent runs of  $10^7$  generations each. Since all independent runs for each dataset converged to the same posterior, the individual runs were combined, resulting in a final aggregate of  $2.7 \times 10^7$  generations (after the exclusion of burn-in trees). In all analyses all the estimated parameters had sufficient effective sample sizes (ESS), in

most cases well above the minimum of 200 recommended (60). Chronograms for all four study groups containing their respective Cerrado lineages are shown in Fig. S2a-d.

### 3) OPTIMIZATION ANALYSIS

Ancestral character reconstruction analysis was used to identify Cerrado lineages and to infer their putative ancestral biomes, and also to investigate the evolution of fire adaptations. Biome types were coded as a multistate character (see below) and optimized under a maximum parsimony criterion ("Unordered") onto the 50% majority rule consensus tree using Mesquite (62). In order to account for topological uncertainty, the procedure 'Trace over trees' was used to summarize ancestral state reconstructions over a set of 540 Bayesian trees sampled at stationarity. In addition, ancestral area optimization was performed using maximum likelihood (ML) reconstruction methods, which allow the incorporation of branch length information into ancestral state inference. In this analysis we used the Mk1 model of character evolution, which assumes that any particular change between states is equally probable, and the rate of change is given by a single parameter. The likelihood of each state on each node was computed for a set of Bayesian trees using the Trace over trees option as described above. At each node a proportion of each state was given, which corresponds to the number of trees on which the reconstructed state set at the node contains that state as uniquely best according to the reconstruction criteria. However, this procedure does not allow character states to be coded as polymorphic (as is the case here). To overcome this problem, we replaced the polymorphism by the predominant biome in which a particular taxon occurs, or the most typical life form of a given species. For critical nodes, independent analyses were conducted using each character state coded as polymorphic, and the results were compared. In all optimization analyses, multiple accessions of the same taxon were pruned in order to reduce each taxon to only one terminal.

#### Ancestral biome reconstruction

The biome of occurrence of each species was classified into 9 categories as follows:

Major areas (aggregate biomes):

| Code | Area                                                                   |
|------|------------------------------------------------------------------------|
| 0    | Dry Forest (including the Chaco and arid subtropical desert/matorral)* |
| 1    | Rain Forest                                                            |
| 2    | Wetland                                                                |
| 3    | Tropical Savanna                                                       |
| 4    | Subtropical Grasslands                                                 |
| 5    | Temperate                                                              |
| 6    | Mediterranean                                                          |
| 7    | Tropical Montane                                                       |
| W    | Widespread across several vegetation types                             |

\*These classes merge into each other and this broad definition has been widely used elsewhere (63). Including the Chaco within a broader dry forest concept is more controversial because of its peculiar flora and occurrence of frost, but does not affect our results.

The following sources, in conjunction with the authors' field experience, were used to assemble a species-level matrix of ecological distributions: *Mimosa* dataset (3, 64-68); *Andira* dataset (7, 69, 70); *Lupinus* dataset (14); Microlicieae dataset (2, 71-75), and the virtual herbaria NYBG (<http://sciweb.nybg.org/science2/vii2.asp>) and MO (<http://www.tropicos.org/>). Designation of biomes of occurrence for the Microlicieae dataset should be considered tentative. In that dataset, because of the very sparse sampling across the family, we often had to assign areas in a very broad sense to correspond to the biome preference of an entire genus represented in the analysis by only one species.

A more refined ancestral biome reconstruction for the Cerrado lineages was also implemented using a finer categorization of Neotropical biomes (15 minor areas, see below), which were optimized onto the phylogenies of the four study groups after scoring each species' distribution. This analysis could only



unequivocally identify ancestral areas for four Cerrado lineages (Caatinga for *Mimosa* 10 and 11, and Amazon for *Andira* 1 and 2, Table S2).

Minor areas (biomes):

| Code | Area                                                               |
|------|--------------------------------------------------------------------|
| 0    | Caatinga                                                           |
| 1    | Amazon                                                             |
| 2    | Atlantic forest                                                    |
| 3    | Andean dry forest                                                  |
| 4    | Wetland                                                            |
| 5    | Temperate grassland                                                |
| 6    | Cerrado                                                            |
| 7    | Non Cerrado-savanna                                                |
| 8    | Chaco                                                              |
| 9    | Mexican dry forest (including matorral and North American deserts) |
| A    | Other rain forests (including gallery forests)                     |
| B    | Other dry forests                                                  |
| C    | Temperate forest (including montane forest)                        |
| D    | Old world dry forests                                              |
| W    | Widespread across many vegetation types                            |

Data on biome of occurrence for *Mimosa*, *Andira*, *Lupinus* and Microlicieae are shown in the Appendices S1-4. The results of the both parsimony and ML optimization analyses used to define Cerrado lineages and ancestral areas are shown in Table S2. Ancestral character reconstructions based on parsimony optimization were mapped onto majority rule consensus trees (Fig. S3a-d).

In most cases the ML agreed with parsimony reconstructions. In a few cases where there were divergences (discussed below), the results obtained do not change the main conclusions this study.

According to the ML optimization, a large *Mimosa* lineage would be defined comprising the *Mimosa* clades 4, 5, 6 and 7, as well as the clade composed by *M. somnians*, *M. brachycarpa* and *M. adenocarpa*. The node that defines this new large clade is present in 91% of the trees, and in 73% of the reconstructions ‘savanna’ is the state with highest probability at that node, although 18% of reconstructions are equivocal. This new clade combining the aforementioned lineages would have an age of 6.7 Mya [4.1-9.4]. Another difference is the inclusion of the wetland species *M. corinadenia* in the lineage *Mimosa* 8, which would imply an age of 5.4 Mya [3.1-8.7] for this group, slightly older than shown in the main paper (4.1 Mya). The ancestral area of this clade based on ML reconstruction remains equivocal.

Because polymorphic states are not allowed in the ML analysis, a few area reconstructions produced divergent results depending on which state was assumed. Polymorphism in *Lupinus guaraniticus* (a species occurring in both Cerrado and subtropical grasslands) coded as ‘savanna’ had no impact on the results (100% trees assigning the node to Cerrado as in the parsimony optimization), but when this species was assigned to subtropical-grassland, the respective node becomes equivocal, implying two independent colonizations of the Cerrado; one represented only by *L. parvifolius*, estimated at 1.4 Mya [0.6-2.4], and another containing the *L. velutinus*, *L. crotalarioides* and *L. subsessilis* clade estimated at 1.2 Mya [0.4-1.9], but in both cases the ancestral area reconstruction is equivocal. Similarly, within the Microlicieae dataset, coding the polymorphic taxa of *Trembleya* as ‘wetland’ changes the delimitation of the Microlicieae Cerrado lineage by excluding *Trembleya* from this clade. This change would imply an age of 8.0 Mya [4.9-11.6] for this Cerrado lineage, 1.8 Mya younger than shown in Fig. 2. If the polymorphic taxa of *Trembleya* are coded as ‘savanna’, the ancestral node defining the Microlicieae Cerrado clade now includes *Trembleya*, as in the parsimony optimization analysis, and is supported by 97% of the reconstructions in the ML analysis.

**Table S2.** Area (biome) optimization used to identify Cerrado lineages (Cerrado crown clades) and infer their putative ancestral areas (stem lineages leading to Cerrado crown clades). Analyses performed using parsimony / maximum likelihood reconstructions based on a set of 540 trees. Values are in percentages. Minor biomes found in the secondary ancestral area reconstructions (parsimony) are in parentheses. Cerrado lineages *Mimosa* 4, 5, 6, and 7 were not found in the ML reconstruction.

| Cerrado lineage  | Trees where clade is found | Trees supporting Cerrado crown clade* | Trees supporting Cerrado crown clade** | Trees containing ancestral node | Ancestral area                                         | Trees supporting ancestral area* | Trees supporting ancestral area** |
|------------------|----------------------------|---------------------------------------|----------------------------------------|---------------------------------|--------------------------------------------------------|----------------------------------|-----------------------------------|
| <i>Mimosa</i> 1  | 100                        | na                                    | na                                     | 100                             | Equivocal                                              | na                               | na                                |
| <i>Mimosa</i> 2  | 100                        | 87 / 97                               | 87 / 97                                | 87                              | Equivocal                                              | na                               | na                                |
| <i>Mimosa</i> 3  | 99                         | 98 / 96                               | 100 / 97                               | 100                             | Dry Forest /<br>Equivocal                              | 66 / na                          | 66 / na                           |
| <i>Mimosa</i> 4  | 100                        | 87 / 94                               | 88 / 94                                | 83                              | Equivocal                                              | na                               | na                                |
| <i>Mimosa</i> 5  | 100                        | na                                    | na                                     | 99                              | Equivocal                                              | na                               | na                                |
| <i>Mimosa</i> 6  | 100                        | 100 / 100                             | 100 / 100                              | 65                              | Equivocal                                              | na                               | na                                |
| <i>Mimosa</i> 7  | 97                         | 89 / 95                               | 91 / 98                                | 96                              | Equivocal                                              | na                               | na                                |
| <i>Mimosa</i> 8  | 92                         | 84 / 92                               | 93 / 100                               | 100                             | Equivocal                                              | na                               | na                                |
| <i>Mimosa</i> 9  | 98                         | 83 / 56                               | 85 / 57                                | 100                             | Dry Forest /<br>Equivocal                              | 97 / na                          | 97 / na                           |
| <i>Mimosa</i> 10 | 100                        | na                                    | na                                     | 100                             | Dry Forest<br>(Caatinga)<br>Dry Forest<br>(Caatinga) / | 100 / 75                         | 100 / 75                          |
| <i>Mimosa</i> 11 | 100                        | na                                    | na                                     | 100                             | Equivocal                                              | 100 / na                         | 100 / na                          |
| <i>Lupinus</i>   | 100                        | 92 / 100                              | 92 / 100                               | 99                              | Grassland<br>Rain Forest                               | 99 / 99                          | 100 / 100                         |
| <i>Andira</i> 1  | 54                         | 35 / 55                               | 65 / 89                                | 100                             | (Amazon)<br>Rain Forest                                | 100 / 99                         | 100 / 99                          |
| <i>Andira</i> 2  | 100                        | 100 / 99                              | 100 / 99                               | 93                              | (Amazon)                                               | 91 / 75                          | 97 / 81                           |
| Microlicieae     | 100                        | - / 97                                | - / 97                                 | 100                             | Wetland                                                | 91 / 57                          | 91 / 57                           |

na: not applicable, either because lineage is formed by only one species (terminal branch), or because an ancestral area could not be assigned (equivocal).

\* percentage of the 540 trees supporting the character state.

\*\* percentage of trees supporting the character state in relation to the subset of trees that contain the node.

### Evolution of fire adaptation

A set of diverse fire adaptations, such as the allocation of biomass to underground storage organs coupled with ability of resprout, thick corky bark (insulation that protects internal tissues), thick terminal branches (more resistant to fire), and specialized phenological strategies, are characteristic of many savanna plants (9, 76-78).

Species of *Mimosa* and *Andira* were classified into 7 life history categories based on the literature (3, 7), and coded as follows:

| Code | Habit                                            |
|------|--------------------------------------------------|
| 0    | Herb                                             |
| 1    | Shrub                                            |
| 2    | Vine/Liana                                       |
| 3    | Functionally herbaceous subshrub with xylopodium |
| 4    | Woody shrub with xylopodium                      |
| 5    | Pachycaul treelet                                |
| 6    | Tree                                             |

Habits 3, 4, and 5 were considered to be associated with fire adapted species, since they involve the presence of an underground storage organ (xylopodium) and fire resistance (pachycaul treelet). In addition, the

evolution of thick corky bark in *Andira* was also investigated. Data on habit (*Mimosa* and *Andira*) and presence/absence of corky bark (*Andira*) are shown in Appendices S1 and S2.

Fig. S4a shows the hypothesized evolution of life form in *Mimosa*, which probably evolved from a woody shrub ancestor. Fire related life forms in *Mimosa* evolved many times. The occurrence of these habits is strongly associated with distribution of species in the Cerrado. However, some fire adapted life forms are also present in other biome types such as subtropical-grasslands, in which natural fires also occur. Fire adapted life form in *Andira* evolved only once, in *A. humilis*, most likely from a tree ancestor (Fig. S4b). This node is present in 292 of 540 trees, and 222 and 224 optimizations support ‘tree’ as the ancestral state for *A. humilis* based on parsimony and ML reconstructions, respectively.

The occurrence of thick corky bark in *Andira* was coded as present and absent based on (7) and optimized onto the phylogeny (Fig. S4c). Bark type is unknown in *A. grandistipula*, *A. jaliscensis*, *A. praecox* and *A. tervequinata* and was coded as missing for these species. Corky bark is hypothesized to have evolved twice in *Andira* (Fig. S4c): once in clade Andira 1 (*A. cordata* and *A. cujabensis*), where all Bayesian trees assigned an origin of corky bark; and a second time in *A. vermifuga* (clade Andira 2). All the *Andira* species with corky bark grow in the Cerrado.

Overall, highly congruent results were found when using a ML approach for ancestral state reconstruction of habit in *Mimosa* and *Andira*, and corky bark in *Andira*.

#### 4) DESCRIPTION OF 15 CERRADO LINEAGES

Mimosa 1: This lineage is represented by only one species, *M. nuda*, which is sister to *M. debilis*, a widespread species that can also occur in the Cerrado. *Mimosa nuda* comprises an alliance of five infraspecific varieties in the Cerrado (3), extending to open habitats in Paraguay and Argentina. This species is a functionally herbaceous subshrub that grows from a xylopodium, enabling it to resprout after fire.

Mimosa 2: This robustly supported clade includes *M. xanthocentra*, *M. verecunda* and *M. jacobita* (and probably its putative sibling species sensu Barneby (3), *M. bipennatula*, not sampled here). All species are restricted to the Cerrado, except *M. xanthocentra*, which has a broader geographic range across South America. Fire adaptations include annual growth from a xylopodium, and leaves crowded towards the branch tips.

Mimosa 3: This strongly supported clade includes members of Barneby’s (3) subseries *Polycephalae* (20 species), *Dicerastes* (1), *Discobolae* (1), *Hirsutae* (11), and also *M. skinneri*. Most species in this clade are Cerrado endemics. *Mimosa hirsutissima* and *M. skinneri* extend their ranges beyond the Cerrado, while three species grow in dry grasslands in Paraguay and Argentina. The group shows diverse fire adaptations including erect virgate stems arising each year from a xylopodium, and many of them are functionally herbaceous subshrubs. The presence of xylopodium in the sister-group of this clade, as well as at the ancestral node leading to it (see Fig. S4a), suggests that members of clade Mimosa 3 retained this fire adapted condition from their ancestors. In this case, the origin of this fire related morphology seems to predate the origin of this Cerrado lineage, suggesting pre-adaptation to fire. Our sample included 16 species of a probable total of 34. This is the second largest group of *Mimosa* in the Cerrado.

Mimosa 4: This well supported clade comprises part of series *Leiocarpae* (3). Based on morphological affinity, we believe it probably comprises 11 species, eight of them growing in fire prone habitats, and the others in the Caatinga and in Paraguay. Six species (7 accessions) of this group were sampled. The predominant life form is a shrub.

Mimosa 5: This group is formed by *M. interrupta*, a Cerrado endemic, and probably *M. glutinosa* (based on morphological affinity), which grows in open vegetation along the Paraguay river basin. Only the first species was sampled in our study.

Mimosa 6: This small clade of arborescent shrubs and trees, represented here by *M. apodocarpa* but probably also containing *M. xavantinae* based on morphological affinities, grow in woodland savanna.

Mimosa 7: This clade contains species from the series *Neptunioideae* (all four species sampled) and *Rojasiana* (one out of three species sampled), and also the monotypic series *Auriculatae* (3), making a total of eight species of herbs and shrubs, some of them showing fire adaptations such as xylopodia. With the exception of *M. occidentalis*, which grows in Mexico and Central America, all species occur in the Cerrado, and most of them are local endemics.

Mimosa 8: This is the largest Cerrado clade within *Mimosa*, remarkably rich in life forms and taxa. It comprises the series *Setosae* and *Pachycarpae* (3) and a total of around 50 species (probably more to be discovered), of which 26 were sampled. Four new species that are currently being described (Simon & Hughes, unpublished) are included in this group. All species grow in the Cerrado and the vast majority are highly specialized local endemics. Strategies and morphological adaptations to fire in this group are amazingly diverse, and include trees with leaves crowded at the top of the branches, thick terminal branches, persistent stipules to protect the trunk from fire, and prostrate functionally herbaceous subshrubs growing from thick xylopodia.

Mimosa 9: This clade comprises species from series *Paucifoliatae* (17 species), *Campicolae* (3), *Filipedes* (6) and *Echinocaulae* (1), making a total of 27 species (estimate based on Barneby's treatment), ca 80% of these occurring in the Cerrado (most of them endemics). The remaining species grow in coastal and southern Brazil, Belize and Venezuela. One species, *M. diplotricha*, is a global invasive weed in tropical regions. Life forms vary from functionally herbaceous plants growing from a carrot-like xylopodium, to erect shrubs. It is known that taxon under-sampling can cause bias towards younger age estimates (79), and this could be an issue since sampling in this group is less than a third of the total species estimated. However, at least one member of each series has been sampled, which reduces the chances of underestimating the age of this clade due to taxonomic under sampling. This group received high support in the Bayesian analysis.

Mimosa 10: This lineage is represented by only one species, *M. laticifera*, a tree endemic to the Cerrado biome. This species has been recorded in 18 of the 376 sites surveyed by (80). This species is nested in a clade composed by species mostly from South American and Old World dry forests, and has probably originated from a Caatinga ancestor.

Mimosa 11: *Mimosa pithecolobioides* is a treelet that grows in cerrado and campo rupestre, restricted to the Cerrado.

Andira 1: This clade is formed by the Cerrado species *A. humilis* and *A. vermifuga*, and also by the wet forest Mexican endemic *A. galleotiana*. *Andira vermifuga* is common in the Cerrado, being recorded in 148 out of 376 sites (80), but occasionally also occurs in wet forest sites. *Andira humilis* has a geoxylic suffrutex growth habit, a unique morphological fire adaptation in this otherwise arborescent genus (7). It grows in savannas and other fire prone vegetation. This clade, although present in our Bayesian analysis, and also in the majority rule tree of a Bayesian analysis (10), is weakly supported. Estimates from the nearest well supported node provide an age of 2.9 Mya CI [1.1-5.2] for this clade, slightly older than the estimate of 1.8 Mya CI [0.5-3.4] shown in Fig. 2j. A divergent ITS copy from *A. humilis* (RTP268) has been found in our analysis. This might be a remnant of introgressive hybridization, followed by bidirectional, concerted evolution of the ITS region between different accessions of *A. humilis* (a phenomenon documented in other taxa, e.g. ref. 81). *Andira humilis* also shows divergent placements of accessions in a chloroplast gene tree (7). However, incongruent placements of accessions of this species in the nuclear and chloroplast gene trees suggest complexity that merits further studies.

Andira 2: This well supported clade includes two species of trees (occasionally shrubs), *A. cordata* and *A. cujabensis*, that have thick corky bark to protect from fire. Both species are restricted to the Cerrado, occurring in savanna habitats and occasionally in gallery forest (7).

Lupinus: The five Cerrado species sampled here form a well supported clade and comprise 45% of all Cerrado species. Under-sampling of Cerrado taxa should not significantly affect our results, considering that all taxa not sampled are very likely to fall within this same clade in which all species have unifoliolate leaves. If all Cerrado species had been included, the age estimate for this lineage is unlikely to be older than 2.7 Mya (split between *L. paraguariensis* and other unifoliolate species). *Lupinus parvifolius* shows a

singular ericoid shrub morphology with imbricate leaves, thought to be an adaptation to fire and which is also found in species of a range of other plant families in the Cerrado.

Microlicieae: The largest Cerrado clade sampled in this study is within the Microlicieae, a well supported clade nested deep within the Melastomataceae (18). This group has an estimated 200 species, many of them narrow endemics, with diverse life forms. Several species show fire adaptations such as the woody rootstock (xylopodium) in *Microlicia*. The genus *Rhyncanthera*, which also belongs to the core Microlicieae was not included in the Cerrado clade, as found by (18). Although *Rhyncanthera* contains a substantial number of species growing within the Cerrado biome, it prefers wetter sites such seasonally flooded marshes with saturated soils, very different from most of the other members of core Microlicieae, which grow mainly in seasonally dry, fire prone habitats (18, 20). The position of *Rhyncanthera* at the base of the clade Microlicieae, and also the fact that some species of *Trembleya* occur in gallery forests and other moist sites, suggest a wetland ancestral biome for this large Cerrado clade (Fig. S3d).

It is interesting to notice that this large fire-adapted clade emerges within a family that predominates in wet, fire-free habitats (see discussion in ref. 18). However, this was not the only incursion of the Melastomataceae into the Cerrado. There is no doubt that there are other fire-adapted lineages in this family, such as within *Miconia*, *Cambessedesia*, and *Tibouchina* that also occur in well drained savanna areas. However, they are yet to be sampled and incorporated into this context. The 3.7 Mya age estimated for the Cerrado core Microlicieae by Fritsch *et al.* (18), and later corroborated by Renner (82), is considerably younger than the one reported here (9.8 Mya). This discrepancy cannot be attributed to the use of different dating methods, since a relaxed molecular clock analysis performed on BEAST using the same calibration points and dataset (with only two species of core Microlicieae) of Fritsch *et al.* (18) found a very similar result (3.5 Mya). The difference between these age estimates can be explained by the fact that under-sampling can bias estimates towards younger ages (79). Since we included a more comprehensive sample of species in the group of interest, the age estimate obtained was significantly older.

## 5) EVIDENCE FROM OTHER GROUPS

A small number of other published plant phylogenies that include Cerrado taxa were also assessed as part of this study. However, problems with: (i) low sampling of Cerrado species; (ii) inadequate phylogenetic resolution and support; (iii) divergence time estimation (e.g., no fossil calibration available), meant they could not be included in the formal analyses of divergence times and ancestral biome / fire adaptation reconstructions. However, in spite of these limitations, the preliminary results presented in these studies are highly consistent with our conclusions providing compelling additional evidence about the origins of the Cerrado flora (Table S3).

**Table S3.** Phylogenetic studies including Cerrado taxa not included in the main analysis. The first three columns highlight the limitations of these phylogenies that led to their exclusion from the main analysis. The last four columns outline elements of these studies that corroborate the conclusions of this paper.

| Study group [ref.]                  | Sampling of Cerrado species* | Well resolved / strongly supported phylogeny | Age estimate provided | Cerrado lineages are derived | Multiple origins of Cerrado lineages | Age of Cerrado lineages (Mya) | Evolution of fire adaptation |
|-------------------------------------|------------------------------|----------------------------------------------|-----------------------|------------------------------|--------------------------------------|-------------------------------|------------------------------|
| <i>Manihot</i> (Euphorbiaceae) [83] | (17/47)                      | no                                           | yes                   | yes                          | yes                                  | <6.6                          | yes (xylopodium)             |
| <i>Ruellia</i> (Acanthaceae) [84]   | (15/52)                      | yes                                          | no                    | yes                          | yes                                  | -                             | yes (xylopodium)             |
| <i>Styrax</i> (Styracaceae) [85]    | (4/16)                       | yes                                          | no                    | yes                          | yes                                  | -                             | yes (thick corky bark)       |
| <i>Viguiera</i> (Asteraceae) [86]   | (9/22)                       | no                                           | yes                   | yes                          | ?                                    | <3                            | yes (xylopodium)             |

\* sampled in the study / total of Cerrado species based on the latest Cerrado checklist (2).

*Manihot* is a genus richly represented in the Cerrado, and many species are subshrubs with large woody roots. The main limitations of the *Manihot* phylogeny (83) are that the tree too poorly resolved and weakly supported (albeit with a number of robustly supported clades) to provide reliable estimates for the ages of Cerrado lineages or to infer ancestral biomes / fire adaptations of Cerrado lineages. Despite these limitations, a number of features are clear: there is clear evidence for multiple independent Cerrado lineages (at least two Cerrado clades), which are nested within *Manihot* and likely to be recent as the crown node divergence time estimate is 6.6 Mya, making the Cerrado nodes younger than that. Thus, the preliminary *Manihot* phylogeny is in line with our findings in terms of recency, in situ evolution, niche lability (multiple independent Cerrado clades) and a strong probability that these are associated with fire adaptation.

*Ruellia* is also well represented in the Cerrado, but sparse taxon sampling and lack of resolution in the phylogeny (84) limit conclusions about the evolution of Cerrado *Ruellia*, making it difficult to infer ancestral biomes or indeed to accurately infer how many independent Cerrado recruitments there may have been. Data on fire adaptations are very scattered and no divergence time estimates are available. However, the *Ruellia* phylogeny strongly supports the idea that there are multiple independent Cerrado lineages nested within *Ruellia*, representing up to eight separate lineages that include species that occur in the Cerrado (albeit not necessarily endemic to the Cerrado). This genus shows striking similarities to *Mimosa*, i.e. a genus that spans virtually the complete diversity of Neotropical biomes and that has several independent Cerrado clades, these nested, and at least some of them associated with lignotubers.

The *Styrax* (85) phylogeny is limited by sparse taxon sampling which makes inferences about the number and distribution of Cerrado clades and their probable ancestral biomes problematic. Furthermore, we have not located any information about fire adaptations, but it is known that some Cerrado species such as *S. ferrugineus* can develop thick corky bark. Despite this, the phylogeny provides clear evidence for two independent Cerrado lineages, both nested within the tree. Therefore, *Styrax* phylogeny is consistent with niche lability and relative recency of Cerrado plant lineages.

Taxon sampling in the phylogeny of *Viguiera* (86) is sparse and lack of resolution in the tree limit inferences about the evolution of the Cerrado *Viguiera*. It is not clear how many Cerrado lineages there are, and it is problematic to infer ancestral biomes. Apparently Cerrado lineage(s) are nested within the genus, and crude (based on substitution rates) divergence time estimates suggest South American, and hence Brazilian species are < 3 Mya.

Additional evidence about the timing of diversification of the Cerrado flora and its association with the emergence of frequent fires comes from recently published dated phylogenies of two important herbaceous monocot groups. The first comes from a study of grass diversification (87). Four of the most important grass genera in the Cerrado (88) have age estimates that are compatible with the dates proposed for the origin of the Cerrado: *Axonopus* (stem node 5 Mya), *Paspalum* (crown node 5 Mya), *Tristachya* (stem node 7 Mya), and *Mesosetum* (stem node 4 Mya). All these genera are C4 Panicoid grasses. Another ecologically important group in the Cerrado is *Rhynchospora* (Cyperaceae). The C4 clade of *Rhynchospora* is composed by 21 species that are particularly successful in open and warm habitats (the Cerrado is an important center of diversity), and was estimated to have originated between 4.2 and 7.4 Mya (89), in line with the hypothesis of a recent origin of the Cerrado. Sampling at the species level in these studies is sparse (often using a single species to represent a genus) and therefore it is difficult to determine if these groups originated within the Cerrado, particularly because many of them are widespread in other biomes, and long distance dispersal in these herbaceous groups is frequent. However, the age estimates provided for these typical flammable herbs provide additional support for the timing of origin of the fire adapted flora of the Cerrado.

## Supporting References:

1. Simon MF, Proença C (2000) Phylogeographic patterns of *Mimosa* (Mimosoideae, Leguminosae) in the Cerrado biome of Brazil: an indicator genus of high-altitude centers of endemism? *Biol Conservation* 96:279-296.
2. Mendonça RC, *et al.* (2008) in *Cerrado: ecology and flora*, eds Sano SM, Almeida SP, Ribeiro JF (Embrapa Cerrados/Embrapa Informação Tecnológica, Brasília, Brazil), Vol 2, pp 421-1279.
3. Barneby RC (1991) Sensitivae Censitae: a description of the genus *Mimosa* Linnaeus (Mimosaceae) in the New World. *Mem New York Bot Gard* 65:1-835.
4. Shaw J, *et al.* (2005) The tortoise and the hare II: relative utility of 21 noncoding chloroplast DNA sequences for phylogenetic analysis. *Am J Bot* 92:142-166.
5. Thompson JD, Gibson TJ, Plewniak F, Jeanmougin F, Higgins DG (1997) The CLUSTAL\_X windows interface: flexible strategies for multiple sequence alignment aided by quality analysis tools. *Nuc Acids Res* 25:4876-4882.
6. Hall TA (1999) BioEdit: a user-friendly biological sequence alignment editor and analysis program for Windows 95/98/NT. *Nuc Acids Symposium Ser* 41:95-98.
7. Pennington RT (2003) Monograph of *Andira* (Leguminosae-Papilionoideae). *Monogr Syst Bot* 64:1-143.
8. Sarmiento G (1983) in *Ecosystems of the world: tropical savannas*, ed Bourlière F (Elsevier, Amsterdam, Netherlands), pp 245-288.
9. Gottsberger G, Silberbauer-Gottsberger I (2006) *Life in the Cerrado, a South American tropical seasonal ecosystem. Vol. 1. Origin, structure, dynamics and plant use* (Reta Verlag, Ulm, Germany).
10. Skema C (2003) Phylogeny and biogeography of *Andira* Lam. *nom. cons.*: a case study in Neotropical speciation. Masters dissertation (Royal Botanic Garden Edinburgh and University of Edinburgh, Edinburgh, UK).
11. Doyle JJ, Doyle JL (1990) Isolation of plant DNA from fresh tissue. *Focus* 12:13-15.
12. Moller M, Cronk QCB (1997) Phylogeny and disjunct distribution: evolution of *Saintpaulia* (Gesneriaceae). *Proc R Soc Lond B* 264:1827-1836.
13. White TJ, Bruns T, Lee S, Taylor JW (1990) in *PCR protocols: a guide to methods and applications*, eds Innis MA, Gelfand D, Sninsky J, White TJ (Academic Press, New York, USA), pp 315-322.
14. Monteiro R, Gibbs PE (1986) A taxonomic revision of the unifoliolate species of *Lupinus* (Leguminosae) in Brazil. *Notes RBG Edinb* 44:71-104.
15. Barneby RC (1991) A new unifoliolate *Lupinus* (Fabaceae, Lupininae) from the Brazilian planalto. *Brittonia* 43:168-170.
16. Hughes C, Eastwood R (2006) Island radiation on a continental scale: exceptional rates of plant diversification after uplift of the Andes. *Proc Natl Acad Sci USA* 103:10334-10339.
17. Almeda F, Martins AB (2001) New combinations and new names in some Brazilian Microlicieae (Melastomataceae), with notes on the delimitation of *Lavoisiera*, *Microlicia*, and *Trembleya*. *Novon* 11:1-7.
18. Fritsch PW, Almeda F, Renner SS, Martins AB, Cruz BC (2004) Phylogeny and circumscription of the near-endemic Brazilian tribe Microlicieae (Melastomataceae). *Am J Bot* 91:1105-1114.
19. Koschnitzke C, Martins AB (2006) Taxonomic revision of *Chaetostoma* DC. (Melastomataceae, Microlicieae) (Translated from Portuguese). *Arquivos do Museu Nacional, Rio de Janeiro* 64:95-119.
20. Renner SS (1990) A revision of *Rhynchanthera* (Melastomataceae). *Nordic J Bot* 9:601-630.
21. Romero R (2003) A newly described species of *Microlicia* (Melastomataceae) from Minas Gerais, Brazil. *Novon* 13:116-118.
22. Martins E (1997) Taxonomic revision of the genus *Trembleya* DC. (Melastomataceae) (Translated from Portuguese). PhD thesis (Universidade Estadual de Campinas, Campinas, Brazil).
23. Clausing G, Renner SS (2001) Molecular phylogenetics of Melastomataceae and Memecylaceae: implications for character evolution. *Am J Bot* 88:486-498.
24. Bruneau A, Mercure M, Lewis GP, Herendeen PS (2008) Phylogenetic patterns and diversification in the caesalpinoid legumes. *Botany* 86:697-718.
25. Lavin M, Herendeen PS, Wojciechowski MF (2005) Evolutionary rates analysis of Leguminosae implicates a rapid diversification of lineages during the Tertiary. *Syst Biol* 54:575-594.
26. Jobson RW, Luckow M (2007) Phylogenetic study of the genus *Piptadenia* (Mimosoideae: Leguminosae) using plastid *trnL-F* and *trnK/matK* sequence data. *Syst Bot* 32:569-575.

27. Luckow M, Fortunato RH, Sede S, Livshultz T (2005) The phylogenetic affinities of two mysterious monotypic mimosoids from southern South America. *Syst Bot* 30:585-602.
28. Wojciechowski MF, Lavin M, Sanderson MJ (2004) A phylogeny of legumes (Leguminosae) based on analyses of the plastid *matK* gene resolves many well-supported subclades within the family. *Am J Bot* 91:1846-1862.
29. Miller JT, Bayer RJ (2003) Molecular phylogenetics of *Acacia* subgenera *Acacia* and *Aculeiferum* (Fabaceae: Mimosoideae), based on the chloroplast *matK* coding sequence and flanking *trnK* intron spacer regions. *Austral Syst Bot* 16:27-33.
30. Luckow M, Miller JT, Murphy DJ, Livshultz T (2003) in *Advances in legume systematics, part 10: High level systematics*, eds Klitgaard BB, Bruneau A (Royal Botanic Gardens, Kew, UK), pp 197-220
31. Herendeen PS, Crepet WL, Dilcher DL (1992) in *Advances in legume systematics, part 4: The fossil record*, eds Herendeen PS, Dilcher DL (Royal Botanic Gardens, Kew, UK), pp 303-316.
32. Miller JT, Grimes JW, Murphy DJ, Bayer RJ, Ladiges PY (2003) A phylogenetic analysis of the Acacieae and Ingeae (Mimosoideae: Fabaceae) based on *trnK*, *matK*, *psbA-trnH*, and *trnL/trnF* sequence data. *Syst Bot* 28:558-566.
33. Donoghue PCJ, Benton MJ (2007) Rocks and clocks: calibrating the Tree of Life using fossils and molecules. *Trends Ecol Evol* 22:424-431.
34. Ho SYW (2007) Calibrating molecular estimates of substitution rates and divergence times in birds. *J Avian Biol* 38:409-414.
35. Crepet WL, Taylor DW (1986) Primitive mimosoid flowers from the Paleocene-Eocene and their systematic and evolutionary implications. *Am J Bot* 73:548-563.
36. Caccavari MA, Barreda V (2000) A new calymmate mimosoid polyad from the Miocene of Argentina. *Rev Palaeobot Palynol* 109:197-203.
37. Crepet WL, Dilcher DL (1977) Investigations of angiosperms from Eocene of North America: a mimosoid inflorescence. *Am J Bot* 64:714-725.
38. Herendeen PS, Dilcher DL (1990) Fossil mimosoid legumes from the Eocene and Oligocene of southeastern North America. *Rev Palaeobot Palynol* 62:339-361.
39. Herendeen PS, Jacobs BF (2000) Fossil legumes from the Middle Eocene (46.0 Ma) Mahenge flora of Singida, Tanzania. *Am J Bot* 87:1358-1366.
40. Dilcher DL, Herendeen PS, Hueber F (1992) in *Advances in legume systematics, part 4: The fossil record*, eds Herendeen PS, Dilcher DL (Royal Botanic Gardens, Kew, UK), pp 33-42.
41. Lewis GP, Schrire BD, Mackinder B, Lock JM (2005) *Legumes of the world* (Royal Botanic Gardens, Kew, UK).
42. Seigler DS, Ebinger JE, Miller JT (2006) *Mariosousa*, a new segregate genus from *Acacia* s.l. (Fabaceae, Mimosoideae) from Central and North America. *Novon* 16:413-420.
43. Calvillo-Canadell L, Cevallos-Ferriz SRS (2005) Diverse assemblage of Eocene and Oligocene Leguminosae from Mexico. *Int J Plant Sci* 166:671-692.
44. Magallón-Puebla S, Cevallos-Ferriz S (1994) Fossil legume fruits from Tertiary strata of Puebla, Mexico. *Canad J Bot* 72:1027-1038.
45. Ferguson IK, Banks H (1994) Tetrad pollen in the subfamily Caesalpinioideae (Leguminosae) and its significance. *Rev Palaeobot Palynol* 83:31-42.
46. Guinet P (1981) in *Advances in legume systematics, part 2*, eds Polhill RM, Raven PH (Royal Botanic Gardens, Kew), pp 835-857.
47. Guinet P, Ferguson IK (1989) in *Advances in legume biology*, eds Stirton CH, Zarucchi JL (Monographs in Systematic Botany from the Missouri Botanical Garden 29, St. Louis, USA), pp 77-103.
48. Muller J (1981) Fossil pollen records of extant angiosperms. *Bot Rev* 47:1-142 .
49. Lima MR, Amador ES (1985) Palynological analysis of sediments from the Resende Formation. Tertiary of the state of Rio de Janeiro, Brazil (Translated from Portuguese). *VIII Congresso Brasileiro de Paleontologia. MME-DNPM. Seção Paleontologia e Estratigrafia* 2:371-378.
50. Guinet P, El Sabrouty N, Soliman HA, Omran AM (1987) Study of pollen characters of the Leguminosae-Mimosoideae from the Tertiary sediments of the northwest of Egypt (Translated from French). *Mémoires Travaux E.P.H.E., Institute de Montpellier* 17:159-171.
51. Sole de Porta N (1961) Contribution to the palynology of the Tertiary of Colombia (Translated from Spanish). *Boletín Geológico de la Universidad Industrial de Santander* 7:55-81.



52. Salard-Cheboldaeff M (1978) On the palynoflora of the Maestrichtian and Tertiary of the coastal sedimentary basin of Cameroon (Translated from French). *Pollen et Spores* 20:215-260.
53. Caccavari MA (1996) Analysis of the South American fossil pollen record of Mimosoideae (Leguminosae). *Rev Palaeobot Palynology* 94:123-135.
54. Guinet P, Rico L (1988) Pollen characters in the genera *Zygia*, *Marmaroxylon* and *Cojoba* (Leguminosae, Mimosoideae, Ingeae): a comparison with related genera. *Pollen et Spores* 30:313-328.
55. Caccavari MA, Dome EA (2000) Subpseudocolpi in polyads of *Acacia*, subgenus *Aculeiferum*. *Grana* 39:32-38.
56. Caccavari MA (2002) Pollen morphology and structure of tropical and subtropical American genera of the *Piptadenia*-group (Leguminosae: Mimosoideae). *Grana* 41:130-141.
57. Rico-Arce L, Banks H (2001) A preliminary survey of pollen and other morphological characters in neotropical *Acacia* subgenus *Aculeiferum* (Leguminosae: Mimosoideae). *Bot J Linn Soc* 135:263-270.
58. Guinet P, Hernandez HM (1989) Pollen characters in the genera *Zapoteca* and *Calliandra* (Leguminosae, Mimosoideae) their systematic and phylogenetic relevance. *Pollen et Spores* 31:5-22.
59. Guinet P (1965) Study of pollen characters in the genus *Calliandra* (Mimosoideae) (Translated from French). *Pollen et Spores* 7:157-173.
60. Drummond AJ, Rambaut A (2007) BEAST: Bayesian evolutionary analysis by sampling trees. *BMC Evol Biol* 7:214.
61. Rambaut A, Charleston M (2002) TreeEdit: phylogenetic tree editor and manipulator v1.0 (Department of Zoology, University of Oxford, UK).
62. Maddison WP, Maddison DR (2007) Mesquite: A modular system for evolutionary analysis. Version 2.01, <http://mesquiteproject.org>.
63. Pennington RT, Lavin M, Oliveira-Filho A (2009) Woody plant diversity, evolution and ecology in the tropics: perspectives from seasonally dry tropical forests. *Ann Rev Ecol Evol Syst.* in press.
64. DuPuy DJ, et al. (2002) *The Leguminosae of Madagascar* (Royal Botanic Gardens, Kew, UK).
65. Lewis GP (1987) *Legumes of Bahia* (Royal Botanic Gardens, Kew, UK).
66. Lewis GP (1990) Five new taxa of *Piptadenia* (Leguminosae: Mimosoideae) from Brazil. *Kew Bull* 46:159-168.
67. Lima MPM, Lima HC (1984) *Parapiptadenia* Brenan (Leguminosae-Mimosoideae) - a taxonomic study of the Brazilian species (Translated from Portuguese). *Rodriguésia* 36:23-30.
68. Lock JM (1989) *Legumes of Africa: a check-list* (Royal Botanic Gardens, Kew, UK).
69. Lima HC (1982) Taxonomic considerations on the genus *Hymenolobium* Benth. (Leg. Fab.) (Translated from Portuguese). *Acta Amaz* 12:41-48.
70. Lima HC (1988) A new species of *Hymenolobium* (Leguminosae, Papilionoideae) from Central America. *Ann Missouri Bot Gard* 75:1145-1147.
71. Berry PE, et al. (2001) in *Flora of the Venezuelan Guayana*, eds Steyermark JA, Berry PE, Yatskievych K, Holst BK (Missouri Botanical Garden Press, St. Louis, USA), Vol 6, pp 236-528.
72. Chen C, Renner SS (2007) in *Flora of China*, eds Wu ZY, Raven PH (Science Press, Beijing & Missouri Botanical Garden Press, St. Louis, USA), Vol 13, pp 360-399.
73. Hansen C (1985) Taxonomic revision of *Driessenia* (Melastomataceae). *Nordic J Bot* 5:335-352.
74. Ionta GM, Judd WS, Williams NH, Whitten WM (2007) Phylogenetic relationships in *Rhexia* (Melastomataceae): evidence from DNA sequence data and morphology. *Int J Plant Sci* 168:1055-1066.
75. Renner SS (1994) A revision of *Pterolepis* (Melastomataceae, Melastomeae). *Nordic J Bot* 14:73-104.
76. Gignoux J, Clobert J, Menaut JC (1997) Alternative fire resistance strategies in savanna trees. *Oecologia* 110:576-583.
77. Miranda H, Bustamante M, Miranda A (2002) in *The Cerrados of Brazil*, eds Oliveira PS, Marquis RJ (Columbia University Press, New York, USA), pp 51-68.
78. Sarmiento G, Monasterio M (1983) in *Ecosystems of the world: tropical savannas*, ed Bourlière F (Elsevier, Amsterdam, Netherlands), pp 79-108.
79. Linder HP, Hardy CR, Rutschmann F (2005) Taxon sampling effects in molecular clock dating: an example from the African Restionaceae. *Mol Phylog Evol* 35:569-582.
80. Ratter JA, Bridgewater S, Ribeiro JF (2003) Analysis of the floristic composition of the Brazilian Cerrado vegetation III: comparison of the woody vegetation of 376 areas. *Edinb J Bot* 60:57-109.

81. Wendel JF, Schnabel A, Seelanan T (1995) Bidirectional interlocus concerted evolution following allopolyploid speciation in cotton (*Gossypium*). *Proc Natl Acad Sci USA* 92:280-284.
82. Renner SS (2004) Bayesian analysis of combined chloroplast loci, using multiple calibrations, supports the recent arrival of Melastomataceae in Africa and Madagascar. *Am J Bot* 91:1427-1435.
83. Chacón J, Madriñán S, Debouck D, Rodriguez F, Tohme J (2008) Phylogenetic patterns in the genus *Manihot* (Euphorbiaceae) inferred from analyses of nuclear and chloroplast DNA regions. *Mol Phylogenet Evol* 49:260-267.
84. Tripp EA (2007) Evolutionary relationships within the species-rich genus *Ruellia* (Acanthaceae). *Syst Bot* 32:628-649.
85. Fritsch PW (2001) Phylogeny and biogeography of the flowering plant genus *Styrax* (Styracaceae) based on chloroplast DNA restriction sites and DNA sequences of the internal transcribed spacer region. *Mol Phylogenet Evol* 19:387-408.
86. Schilling EE, Da Costa FB, Lopes NP, Heise PJ (2000) Brazilian species of *Viguiera* (Asteraceae) exhibit low levels of ITS sequence variation. *Edinb J Bot* 57:323-332.
87. Christin PA, *et al.* (2008) Oligocene CO<sub>2</sub> decline promoted C-4 photosynthesis in grasses. *Curr Biol* 18:37-43.
88. Filgueiras TS (2002) in *The Cerrados of Brazil*, eds Oliveira PS, Marquis RJ (Columbia University Press, New York, USA), pp 121-139.
89. Besnard G, *et al.* (2009) Phylogenomics of C<sub>4</sub> photosynthesis in sedges (Cyperaceae): multiple appearances and genetic convergence. *Mol Biol Evol* 26: 1909-1919.
90. Holmgren PK, Holmgren NH, Barnett LC (1990) *Index Herbariorum. Part I: the herbaria of the world* (International Association for Plant Taxonomy and the New York Botanical Garden, New York, USA).

**Appendix S1.** *Mimosa* dataset: species sampled in this study, voucher information, GenBank accession numbers for *trnD-trnT* sequences, biome and habit (see text for coding). Herbarium acronyms follow Holmgren *et al.* (90). \* Un-named species for which descriptions are in preparation (Simon & Hughes, unpubl. data; Lewis *et al.*, unpubl. data).

| Species                                                                                                        | Voucher               | Herbarium | Country  | GenBank accession number | Biome | Habit |
|----------------------------------------------------------------------------------------------------------------|-----------------------|-----------|----------|--------------------------|-------|-------|
| <i>Anadenanthera colubrina</i> (Vell.) Brenan                                                                  | Hughes CE 2308        | FHO       | Bolivia  | FJ981975                 | 0     | 6     |
| <i>Microlobius foetidus</i> (Jacq.) M.Sousa & G.Andrade                                                        | Hughes CE 2150        | FHO       | Mexico   | FJ981976                 | 0     | 6     |
| <i>Mimosa acantholoba</i> (Willd.) Poir. var. <i>acantholoba</i>                                               | Eastwood RJ 118       | FHO       | Peru     | FJ981977                 | 0,3   | 1,6   |
| <i>Mimosa acantholoba</i> Poir. var. <i>eurycarpa</i> (B.L.Rob.) Barneby                                       | Montaño-Arias S 28    | UAMIZ     | Mexico   | FJ981978                 | 0,3   | 1,6   |
| <i>Mimosa acapulcensis</i> B.L.Rob.                                                                            | Otero R R2            | MEXU      | Mexico   | FJ981979                 | 0     | 1     |
| <i>Mimosa aculeaticarpa</i> Ortega                                                                             | Simon MF 808          | MEXU      | Mexico   | FJ981980                 | 7     | 1     |
| <i>Mimosa acutistipula</i> Benth. var. <i>acutistipula</i>                                                     | Simon MF 705          | FHO       | Brazil   | FJ981981                 | 0     | 1     |
| <i>Mimosa adenantheroides</i> (Martens & Galleotti) Benth.                                                     | Martínez-Bernal A 945 | UAMIZ     | Mexico   | FJ981982                 | 0,7   | 1     |
| <i>Mimosa adenantheroides</i> (Martens & Galleotti) Benth. var. <i>hystricosa</i> (Brandegee) R.Grether, ined. | Tenorio P 21201       | MEXU      | Mexico   | FJ981983                 | 0,7   | 1     |
| <i>Mimosa adenocarpa</i> Benth.                                                                                | Simon MF 728          | FHO       | Brazil   | FJ981984                 | 2,3   | 1     |
| <i>Mimosa adenophylla</i> Taub. ex Glaz.                                                                       | Simon MF 458          | UB        | Brazil   | FJ981985                 | 3     | 1     |
| <i>Mimosa adenophylla</i> Taub. ex Glaz. var. <i>mitis</i> Barneby                                             | Lima LCL 184          | HUEFS     | Brazil   | FJ981986                 | 0,3   | 1     |
| <i>Mimosa adenotricha</i> Benth.                                                                               | Dutra VF 332          | VIC       | Brazil   | FJ981987                 | 3     | 1     |
| <i>Mimosa</i> aff. <i>bathyrhena</i> Barneby                                                                   | Simon MF 874          | FHO       | Brazil   | FJ981988                 | 1     | 1     |
| <i>Mimosa</i> aff. <i>flagellaris</i> Benth.                                                                   | Queiroz LP 12322      | HUEFS     | Brazil   | FJ981989                 | 4     | 3     |
| <i>Mimosa</i> aff. <i>weberbaueri</i> Harms                                                                    | Pennington TD 17903   | K         | Peru     | FJ981990                 | 4     | 1     |
| <i>Mimosa</i> aff. <i>xanthocentra</i> Mart.                                                                   | Queiroz LP 10476      | HUEFS     | Brazil   | FJ981991                 | 3     | 3     |
| <i>Mimosa affinis</i> B.L.Rob.                                                                                 | Simon MF 814          | MEXU      | Mexico   | FJ981992                 | W     | 0     |
| <i>Mimosa albida</i> Humb. & Bonpl. ex Willd. var. <i>albida</i>                                               | Hughes CE 2083        | FHO       | Mexico   | FJ981993                 | W     | 1     |
| <i>Mimosa albolanata</i> Taub.                                                                                 | Simon MF 667          | UB        | Brazil   | FJ981994                 | 3     | 4     |
| <i>Mimosa antioquiensis</i> Killip ex Rudd var. <i>isthmensis</i> R.Grether                                    | Simon MF 860          | MEXU      | Mexico   | FJ981995                 | 0,1   | 2     |
| <i>Mimosa antrorsa</i> Benth.                                                                                  | Fagg CW 1747          | UB        | Brazil   | FJ981996                 | 3     | 1     |
| <i>Mimosa apodocarpa</i> Benth.                                                                                | Simon MF 635          | UB        | Brazil   | FJ981997                 | 3     | 1     |
| <i>Mimosa arenosa</i> (Willd.) Poir. var. <i>leiocarpa</i> (DC.) Barneby                                       | Martínez-Bernal A 923 | UAMIZ     | Mexico   | FJ981998                 | 0,3   | 1     |
| <i>Mimosa artemisiana</i> Heringer & Paula                                                                     | Faria SM 138          | RB        | Brazil   | FJ981999                 | 1     | 6     |
| <i>Mimosa aspera</i> M.E.Jones                                                                                 | Simon MF 817          | MEXU      | Mexico   | FJ982000                 | 0     | 1     |
| <i>Mimosa atlantica</i> Barneby                                                                                | Ribas OS 4333         | HUEFS     | Brazil   | FJ982001                 | 1     | 1     |
| <i>Mimosa auriculata</i> Benth.                                                                                | Hughes CE 2405        | FHO       | Bolivia  | FJ982002                 | 3     | 1     |
| <i>Mimosa bahamensis</i> Benth.                                                                                | Way MJ 132            | K         | Mexico   | FJ982003                 | 0     | 1     |
| <i>Mimosa benthamii</i> Macbride                                                                               | Simon MF 848          | MEXU      | Mexico   | FJ982004                 | 0     | 1     |
| <i>Mimosa bifurca</i> Benth.                                                                                   | Dahmer N 4            | ICN       | Brazil   | FJ982005                 | 4     | 1     |
| <i>Mimosa bimucronata</i> Kuntze                                                                               | Simon MF 301          | UB        | Brazil   | FJ982006                 | 1     | 6     |
| <i>Mimosa biuncifera</i> Benth.                                                                                | Simon MF 805          | MEXU      | Mexico   | FJ982007                 | 0     | 1     |
| <i>Mimosa blanchetii</i> Benth.                                                                                | Simon MF 688          | FHO       | Brazil   | FJ982008                 | 0     | 1     |
| <i>Mimosa boliviana</i> Benth.                                                                                 | Hughes CE 2426        | FHO       | Bolivia  | FJ982009                 | 0     | 1     |
| <i>Mimosa borealis</i> A.Gray                                                                                  | Simon MF 873          | FHO       | USA      | FJ982010                 | 0     | 1     |
| <i>Mimosa brachycarpa</i> Benth.                                                                               | Queiroz LP 10589      | HUEFS     | Brazil   | FJ982011                 | 3     | 1     |
| <i>Mimosa brevipefoliata</i> Burkart var. <i>hirtula</i> (Burkart) Barneby                                     | Queiroz LP 12614      | HUEFS     | Brazil   | FJ982012                 | 4     | 3     |
| <i>Mimosa busseana</i> Harms                                                                                   | Clarke GP 26          | K         | Tanzania | FJ982013                 | 0     | 1     |
| <i>Mimosa caesalpinjifolia</i> Benth.                                                                          | Simon MF 756          | FHO       | Brazil   | FJ982014                 | 0     | 6     |
| <i>Mimosa calcicola</i> B.L.Rob.                                                                               | Simon MF 846          | MEXU      | Mexico   | FJ982015                 | 0     | 1     |
| <i>Mimosa callidryas</i> Barneby                                                                               | Cruz JM 94            | HUEFS     | Brazil   | FJ982016                 | 4     | 1     |
| <i>Mimosa callithrix</i> Malme                                                                                 | Simon MF 684          | UB        | Brazil   | FJ982017                 | 3     | 1     |
| <i>Mimosa campicola</i> Harms var. <i>planipes</i> Barneby                                                     | Simon MF 692          | FHO       | Brazil   | FJ982018                 | 3     | 1     |
| <i>Mimosa camporum</i> Benth.                                                                                  | Faria SM 729          | RB        | Brazil   | FJ982019                 | W     | 0     |
| <i>Mimosa candollei</i> R.Grether                                                                              | Hughes CE 2394        | FHO       | Bolivia  | FJ982020                 | W     | 1     |
| <i>Mimosa casta</i> L.                                                                                         | Johnson CD 2189-80    | MEXU      | Panama   | FJ982021                 | 0,1   | 2     |
| <i>Mimosa ceratonia</i> L. var. <i>interior</i> Barneby                                                        | Simon MF 727          | FHO       | Brazil   | FJ982022                 | 1     | 1     |
| <i>Mimosa chartostegia</i> Barneby                                                                             | Ribas OS 5085         | HUEFS     | Brazil   | FJ982023                 | 4     | 1     |
| <i>Mimosa cisparanensis</i> Barneby                                                                            | Simon MF 568          | UB        | Brazil   | FJ982024                 | 3     | 1     |
| <i>Mimosa claussenii</i> Benth. var. <i>claviceps</i> Barneby                                                  | Simon MF 766          | FHO       | Brazil   | FJ982025                 | 3     | 5     |
| <i>Mimosa claussenii</i> Benth. var. <i>megistophylla</i> Barneby                                              | Simon MF 768          | FHO       | Brazil   | FJ982026                 | 3     | 1     |
| <i>Mimosa colombiana</i> Britton & Killip                                                                      | Torres AM 21343       | K         | Colombia | FJ982027                 | 1     | 2     |
| <i>Mimosa coniflora</i> Burkart                                                                                | Ribas OS 3060         | HUEFS     | Brazil   | FJ982028                 | 1     | 1     |
| <i>Mimosa cordistipula</i> Benth.                                                                              | Simon MF 693          | FHO       | Brazil   | FJ982029                 | 0,3   | 4     |
| <i>Mimosa coruscocoesia</i> Barneby                                                                            | Martins RC 469        | UB        | Brazil   | FJ982030                 | 3     | 1     |
| <i>Mimosa corynadenia</i> Britton & Rose                                                                       | Sousa M 12896         | MEXU      | Mexico   | FJ982031                 | 2     | 1     |
| <i>Mimosa costenya</i> McVaugh                                                                                 | Simon MF 833          | MEXU      | Mexico   | FJ982032                 | 0     | 6     |
| <i>Mimosa cruenta</i> Benth.                                                                                   | Queiroz LP 12575      | HUEFS     | Brazil   | FJ982033                 | 4     | 4     |

## Appendix S1 (cont.)

|                                                                         |                       |       |                    |          |       |       |
|-------------------------------------------------------------------------|-----------------------|-------|--------------------|----------|-------|-------|
| <i>Mimosa crumenarioides</i> L.P.Queiroz & G.P.Lewis                    | Simon MF 722          | FHO   | Brazil             | FJ982034 | 3     | 4     |
| <i>Mimosa cryptothamnos</i> Barneby                                     | Simon MF 738          | FHO   | Brazil             | FJ982035 | 3     | 4     |
| <i>Mimosa ctenodes</i> Barneby                                          | Hughes CE 2212        | FHO   | Peru               | FJ982036 | 0     | 1     |
| <i>Mimosa cyclophylla</i> Taub.                                         | Simon MF 757          | FHO   | Brazil             | FJ982037 | 3     | 3     |
| <i>Mimosa daleoides</i> Benth.                                          | Schinini A 35683      | MEXU  | Argentina          | FJ982038 | 4     | 1     |
| <i>Mimosa dalyi</i> Barneby                                             | Wood JRI 16487        | K     | Bolivia            | FJ982039 | 0     | 1     |
| <i>Mimosa deamii</i> B.L.Rob.                                           | Martínez-Bernal A 919 | UAMIZ | Mexico             | FJ982040 | 0     | 1     |
| <i>Mimosa debilis</i> Humb. & Bonpl. ex Willd. var. <i>debilis</i>      | Hughes CE 2393        | FHO   | Bolivia            | FJ982041 | W     | 0,1,3 |
| <i>Mimosa decorticans</i> Barneby                                       | Simon MF 681          | UB    | Brazil             | FJ982042 | 3     | 1     |
| <i>Mimosa delicatula</i> Baill.                                         | Sutherland JM 262     | K     | Madagascar         | FJ982043 | 0     | 1     |
| <i>Mimosa densa</i> Benth. var. <i>densa</i>                            | Simon MF 870          | FHO   | Brazil             | FJ982044 | 3     | 1     |
| <i>Mimosa depauperata</i> Benth.                                        | Simon MF 801          | MEXU  | Mexico             | FJ982045 | 0     | 1     |
| <i>Mimosa detinens</i> Benth.                                           | Sanchez 46            | MO    | Bolivia            | FJ982046 | 0     | 1     |
| <i>Mimosa dicerastes</i> Barneby                                        | Simon MF 448          | UB    | Brazil             | FJ982047 | 3     | 1     |
| <i>Mimosa diminuta</i> sp. nov. ined.*                                  | Simon MF 866A         | FHO   | Brazil             | FJ982048 | 3     | 3     |
| <i>Mimosa diplotricha</i> C.Wright ex Sauvalle var. <i>diplotricha</i>  | Simon MF 600          | UB    | Brazil             | FJ982049 | W     | 0,1   |
| <i>Mimosa diplotricha</i> C.Wright ex Sauvalle var. <i>diplotricha</i>  | Simon MF 877          | FHO   | Taiwan             | FJ982050 | W     | 0,1   |
| <i>Mimosa discobola</i> Barneby                                         | Simon MF 744          | FHO   | Brazil             | FJ982051 | 3     | 1     |
| <i>Mimosa distachya</i> Cav. var. <i>oligacantha</i> (DC.) Barneby      | Ku F 365              | MEXU  | Mexico             | FJ982052 | 0     | 1     |
| <i>Mimosa dolens</i> Vell. var. <i>rigida</i> (Benth.) Barneby          | Simon MF 879          | FHO   | Brazil             | FJ982053 | 3,4   | 3     |
| <i>Mimosa dominarum</i> Barneby                                         | Simon MF 776          | FHO   | Brazil             | FJ982054 | 3     | 5     |
| <i>Mimosa domingensis</i> Benth.                                        | Barneby RC 18276      | NY    | Dominican Republic | FJ982055 | 0     | 1     |
| <i>Mimosa dormiens</i> Humb. & Bonpl. ex Willd.                         | Guadarrama MA 6841    | MEXU  | Mexico             | FJ982056 | 2     | 1     |
| <i>Mimosa dryandroides</i> Taub. ex Glaz.                               | Ribas OS 3449         | HUEFS | Brazil             | FJ982057 | 1     | 1     |
| <i>Mimosa dutrae</i> Malme                                              | Dahmer N 5            | ICN   | Brazil             | FJ982058 | 4     | 0     |
| <i>Mimosa dysocarpa</i> Benth.                                          | Newman M 296          | K     | USA                | FJ982059 | 0     | 1     |
| <i>Mimosa echinocaula</i> Benth.                                        | Simon MF 679          | UB    | Brazil             | FJ982060 | 3     | 1     |
| <i>Mimosa emoryana</i> Benth.                                           | Grether R 2842        | UAMIZ | Mexico             | FJ982061 | 0     | 1     |
| <i>Mimosa ervendbergii</i> A.Gray                                       | Martínez E 35132      | MEXU  | Mexico             | FJ982062 | 1     | 2     |
| <i>Mimosa fachinalensis</i> Burkart                                     | Dahmer N 16           | ICN   | Brazil             | FJ982063 | 1     | 1     |
| <i>Mimosa fachinalensis</i> Burkart                                     | Dahmer N 20           | ICN   | Brazil             | FJ982064 | 1     | 1     |
| <i>Mimosa filipes</i> Mart.                                             | Queiroz LP 10058      | HUEFS | Brazil             | FJ982065 | 0,3   | 1     |
| <i>Mimosa flagellaris</i> Benth.                                        | Queiroz LP 12545      | HUEFS | Brazil             | FJ982066 | 4     | 3     |
| <i>Mimosa flocculosa</i> Burkart                                        | CNPF sn               | ?     | Brazil             | FJ982067 | 1     | 1     |
| <i>Mimosa foliolosa</i> Benth. var. <i>pubescens</i> Benth.             | Simon MF 733          | FHO   | Brazil             | FJ982068 | 3     | 4     |
| <i>Mimosa galeottii</i> Benth.                                          | Simon MF 840          | MEXU  | Mexico             | FJ982069 | 0     | 1     |
| <i>Mimosa gatesiae</i> Barneby                                          | Simon MF 741          | FHO   | Brazil             | FJ982070 | 3     | 3     |
| <i>Mimosa gemmulata</i> Barneby var. <i>gemmulata</i>                   | Simon MF 690          | FHO   | Brazil             | FJ982071 | 0,3   | 1     |
| <i>Mimosa goldmanii</i> B.L.Rob.                                        | Martínez-Bernal A 921 | UAMIZ | Mexico             | FJ982072 | 0     | 1     |
| <i>Mimosa gracilis</i> Benth. var. <i>invisiformis</i> Barneby          | Simon MF 762          | FHO   | Brazil             | FJ982073 | 3     | 3     |
| <i>Mimosa gracilis</i> Benth. var. <i>stipitata</i> Barneby             | Simon MF 745          | FHO   | Brazil             | FJ982074 | 3     | 3     |
| <i>Mimosa grandidieri</i> Baill.                                        | Du Puy DJ M56         | K     | Madagascar         | FJ982075 | 0     | 1     |
| <i>Mimosa guaranitica</i> Chodat & Hassl.                               | Nascimento JG 474     | HUEFS | Brazil             | FJ982076 | 0,3,4 | 3     |
| <i>Mimosa guatemalensis</i> (Hook. & Arn.) Benth.                       | Simon MF 831          | MEXU  | Mexico             | FJ982077 | 0     | 1     |
| <i>Mimosa guilandinae</i> (DC.) Barneby var. <i>guilandinae</i>         | Prévost M-F 3958      | K     | French Guiana      | FJ982078 | 1     | 2     |
| <i>Mimosa gymnas</i> Barneby                                            | Silva JM 3541         | HUEFS | Brazil             | FJ982079 | 1     | 1     |
| <i>Mimosa hafomantsina</i> Villiers                                     | Lewis GP 2138         | K     | Madagascar         | FJ982080 | 0     | 6     |
| <i>Mimosa hamata</i> Willd.                                             | Simon MF 876          | FHO   | India              | FJ982081 | 0     | 1     |
| <i>Mimosa heringeri</i> Barneby                                         | Proença C 2138        | UB    | Brazil             | FJ982082 | 3     | 1     |
| <i>Mimosa hexandra</i> M.Micheli                                        | Fabian-Martinez K 128 | MEXU  | Mexico             | FJ982083 | 0     | 1,6   |
| <i>Mimosa hexandra</i> M.Micheli                                        | Simon MF 711          | FHO   | Brazil             | FJ982084 | 0     | 1,6   |
| <i>Mimosa hirsutissima</i> Mart. var. <i>barbigera</i> (Benth.) Barneby | Simon MF 765          | FHO   | Brazil             | FJ982085 | 3     | 3     |
| <i>Mimosa hirsutissima</i> Mart. var. <i>grossa</i> Barneby             | Queiroz LP 12854      | HUEFS | Brazil             | FJ982086 | 3     | 3     |
| <i>Mimosa hondurana</i> Britton                                         | Simon MF 858          | MEXU  | Mexico             | FJ982087 | 1     | 2     |
| <i>Mimosa honesta</i> Mart.                                             | Simon MF 720          | FHO   | Brazil             | FJ982088 | 0     | 3     |
| <i>Mimosa humivagans</i> Barneby                                        | Simon MF 737          | FHO   | Brazil             | FJ982089 | 3     | 3     |
| <i>Mimosa hypoglauca</i> Mart. var. <i>hypoglauca</i>                   | Simon MF 723          | FHO   | Brazil             | FJ982090 | 3     | 4     |
| <i>Mimosa incana</i> Benth.                                             | Dahmer N 2            | ICN   | Brazil             | FJ982091 | 4     | 1     |
| <i>Mimosa incarum</i> Barneby                                           | Hughes CE 2206        | FHO   | Peru               | FJ982092 | 0     | 1     |
| <i>Mimosa interrupta</i> Benth.                                         | Queiroz LP 10485      | HUEFS | Brazil             | FJ982093 | 3     | 1,6   |
| <i>Mimosa invisita</i> Mart. ex Colla var. <i>invisita</i>              | Simon MF 715          | FHO   | Brazil             | FJ982094 | 0,1,3 | 1     |
| <i>Mimosa irrigua</i> Barneby                                           | Simon MF 694          | FHO   | Brazil             | FJ982095 | 0     | 1     |
| <i>Mimosa jacobita</i> Barneby                                          | Hughes CE 2400        | FHO   | Bolivia            | FJ982096 | 3     | 1     |
| <i>Mimosa josephina</i> Barneby                                         | Hughes CE 2398        | FHO   | Bolivia            | FJ982097 | 3     | 1     |
| <i>Mimosa kalunga</i> sp. nov. ined.*                                   | Simon MF 866          | FHO   | Brazil             | FJ982098 | 3     | 3     |
| <i>Mimosa lacerata</i> Rose                                             | Hughes CE 2057        | FHO   | Mexico             | FJ982099 | 0     | 1     |
| <i>Mimosa lactiflua</i> Delile ex Benth.                                | Hughes CE 2079        | FHO   | Mexico             | FJ982100 | 0     | 1     |

## Appendix S1 (cont.)

|                                                                                  |                         |       |            |          |     |     |
|----------------------------------------------------------------------------------|-------------------------|-------|------------|----------|-----|-----|
| <i>Mimosa lamolina</i> sp. nov. ined.*                                           | Hughes CE 2648          | FHO   | Peru       | FJ982101 | 0   | 1   |
| <i>Mimosa laniceps</i> Barneby                                                   | Simon MF 773            | FHO   | Brazil     | FJ982102 | 3   | 1   |
| <i>Mimosa lanuginosa</i> Glaz. ex Burkart var. <i>lanuginosa</i>                 | Simon MF 732            | FHO   | Brazil     | FJ982103 | 3   | 3   |
| <i>Mimosa laticifera</i> Rizzini & Mattos                                        | Simon MF 599            | UB    | Brazil     | FJ982104 | 3   | 6   |
| <i>Mimosa latispinosa</i> Lam.                                                   | Sutherland JM 206       | K     | Madagascar | FJ982105 | 0   | 6   |
| <i>Mimosa lepidophora</i> Rizzini                                                | Cardoso D 1747          | FHO   | Brazil     | FJ982106 | 0   | 1   |
| <i>Mimosa lepidota</i> Herzog                                                    | Hughes CE 2469          | FHO   | Bolivia    | FJ982107 | 0   | 1   |
| <i>Mimosa leptantha</i> Benth.                                                   | Nascimento JG 471       | HUEFS | Brazil     | FJ982108 | 0   | 1   |
| <i>Mimosa leptocarpa</i> Rose                                                    | Rico L 1014             | K     | Mexico     | FJ982109 | 0   | 1   |
| <i>Mimosa leucaenoides</i> Benth.                                                | Montaño-Arias S 8       | UAMIZ | Mexico     | FJ982110 | 0   | 1   |
| <i>Mimosa levenensis</i> Drake                                                   | Luckow M 4453           | FHO   | Madagascar | FJ982111 | 0   | 1   |
| <i>Mimosa lewisii</i> Barneby                                                    | Simon MF 696            | FHO   | Brazil     | FJ982112 | 0   | 1   |
| <i>Mimosa loxensis</i> Barneby                                                   | Lewis GP 2987           | K     | Ecuador    | FJ982113 | 0   | 1   |
| <i>Mimosa luisana</i> Brandege                                                   | Simon, M.F. 844         | FHO   | Mexico     | FJ982114 | 0   | 1   |
| <i>Mimosa malacophylla</i> A.Gray                                                | Camargo-Ricalde SL 530  | UAMIZ | Mexico     | FJ982115 | 0   | 2   |
| <i>Mimosa manidea</i> Barneby                                                    | Simon MF 760            | FHO   | Brazil     | FJ982116 | 3   | 5   |
| <i>Mimosa martindelcampoi</i> Medrano                                            | Camargo-Ricalde SL 527  | UAMIZ | Mexico     | FJ982117 | 0   | 1   |
| <i>Mimosa melanocarpa</i> Benth.                                                 | Simon MF 675            | UB    | Brazil     | FJ982118 | 3   | 1   |
| <i>Mimosa menabeensis</i> R.Vig. var. <i>menabeensis</i>                         | Sutherland JM 209       | K     | Madagascar | FJ982119 | 0   | 1   |
| <i>Mimosa minarum</i> Barneby                                                    | Nascimento JG 495       | HUEFS | Brazil     | FJ982120 | 0,3 | 3   |
| <i>Mimosa minutifolia</i> B.L.Rob. & Greenm.                                     | Simon MF 810            | MEXU  | Mexico     | FJ982121 | 3   | 3   |
| <i>Mimosa modesta</i> Mart. var. <i>modesta</i>                                  | Simon MF 708            | FHO   | Brazil     | FJ982122 | 0   | 3   |
| <i>Mimosa mollis</i> Benth.                                                      | Simon MF 850            | MEXU  | Mexico     | FJ982123 | 0   | 1   |
| <i>Mimosa monanctristra</i> Benth.                                               | Simon MF 809            | MEXU  | Mexico     | FJ982124 | 0   | 1   |
| <i>Mimosa montana</i> Kunth. var. <i>montana</i>                                 | Hughes CE 2225          | FHO   | Peru       | FJ982125 | 0   | 1   |
| <i>Mimosa mossambicensis</i> Brenan                                              | Brummitt RK 8896        | K     | Malawi     | FJ982126 | 0   | 1   |
| <i>Mimosa myriadenia</i> (Benth.) Benth. var. <i>punctulata</i> (Benth.) Barneby | Acevedó-Rdgz P 7483     | K     | Ecuador    | FJ982127 | 1   | 2   |
| <i>Mimosa myriocephala</i> Baker                                                 | Rakoto R 329            | K     | Madagascar | FJ982128 | 0   | 2   |
| <i>Mimosa nanchititlana</i> R.Grether & Barneby                                  | Grether R 2938          | UAMIZ | Mexico     | FJ982129 | 7   | 1   |
| <i>Mimosa neptunioides</i> Harms                                                 | Wood JRI 22123          | K     | Bolivia    | FJ982130 | 2,3 | 1   |
| <i>Mimosa nossibiensis</i> Benth. var. <i>nossibiensis</i>                       | Du Puy DJ M350          | K     | Madagascar | FJ982131 | 0   | 2   |
| <i>Mimosa nothacacia</i> Barneby                                                 | Lewis GP 2353           | K     | Ecuador    | FJ982132 | 0   | 6   |
| <i>Mimosa nuda</i> Benth. var. <i>nuda</i>                                       | Hughes CE 2396          | FHO   | Bolivia    | FJ982133 | 3   | 3   |
| <i>Mimosa nuttallii</i> (DC.) B.L.Turner                                         | Simon MF 875            | FHO   | USA        | FJ982134 | 0   | 0   |
| <i>Mimosa oblonga</i> Benth.                                                     | Barbosa E 463           | HUEFS | Brazil     | FJ982135 | 1   | 1   |
| <i>Mimosa occidentalis</i> Britton & Rose                                        | Simon MF 821            | MEXU  | Mexico     | FJ982136 | 1   | 0   |
| <i>Mimosa oligosperma</i> Barneby                                                | Simon MF 865            | FHO   | Brazil     | FJ982137 | 3   | 1   |
| <i>Mimosa onilahensis</i> R.Vig.                                                 | Du Puy DJ M899          | K     | Madagascar | FJ982138 | 0   | 1   |
| <i>Mimosa ophthalmocentra</i> Mart. ex Benth.                                    | Way MJ SWM2434          | K     | Brazil     | FJ982139 | 0   | 1   |
| <i>Mimosa orthacantha</i> Benth.                                                 | Barros JC sn            | K     | Brazil     | FJ982140 | 1   | 1   |
| <i>Mimosa orthocarpa</i> Spruce ex Benth.                                        | Simon MF 855            | MEXU  | Mexico     | FJ982141 | 4   | 1   |
| <i>Mimosa palmeri</i> Rose                                                       | Simon MF 823            | MEXU  | Mexico     | FJ982142 | 0   | 1   |
| <i>Mimosa papposa</i> Benth. var. <i>papposa</i>                                 | Simon MF 601            | UB    | Brazil     | FJ982143 | 3   | 3   |
| <i>Mimosa pectinatipinna</i> Burkart                                             | Hughes CE 2036          | FHO   | Peru       | FJ982144 | 0   | 1   |
| <i>Mimosa pedersenii</i> Barneby                                                 | Queiroz LP 12645        | HUEFS | Brazil     | FJ982145 | 1   | 1   |
| <i>Mimosa per-dusenii</i> Burkart                                                | Ribas OS 4545           | HUEFS | Brazil     | FJ982146 | 4   | 1   |
| <i>Mimosa pigra</i> L. var. <i>berlandieri</i> (A.Gray) B.L.Turner               | Camargo-Ricalde SL 531  | UAMIZ | Mexico     | FJ982147 | 2   | 1   |
| <i>Mimosa pigra</i> L. var. <i>dehiscens</i> (Barneby) D.Glazier & Mackinder     | Hughes CE 2414          | FHO   | Bolivia    | FJ982148 | 2   | 1   |
| <i>Mimosa pilulifera</i> Benth.                                                  | Dahmer N 3              | ICN   | Brazil     | FJ982149 | 1   | 1   |
| <i>Mimosa pilulifera</i> Benth. var. <i>pseudincana</i> (Burbart) Barneby        | Simon MF 878            | FHO   | Brazil     | FJ982150 | 1   | 1   |
| <i>Mimosa pithecolobioides</i> Benth.                                            | Dutra VF 317            | VIC   | Brazil     | FJ982151 | 3   | 1   |
| <i>Mimosa platycarpa</i> Benth. var. <i>platycarpa</i>                           | Simon MF 859            | MEXU  | Mexico     | FJ982152 | 0   | 1,6 |
| <i>Mimosa polyantha</i> Benth.                                                   | Simon MF 829            | MEXU  | Mexico     | FJ982153 | 0   | 1   |
| <i>Mimosa polycarpa</i> Kunth var. <i>subandina</i> Barneby                      | Hughes CE 2462          | FHO   | Bolivia    | FJ982154 | 0,2 | 1   |
| <i>Mimosa polycephala</i> Benth. var. <i>polycephala</i>                         | Simon MF 400            | UB    | Brazil     | FJ982155 | 3   | 3   |
| <i>Mimosa polydactyla</i> Humb. & Bonpl. ex Willd.                               | Coradin L 8682          | CEN   | Brazil     | FJ982156 | 1   | 0   |
| <i>Mimosa polydidyma</i> Barneby                                                 | Simon MF 719            | FHO   | Brazil     | FJ982157 | 3   | 3   |
| <i>Mimosa prainiana</i> Gamble                                                   | Maesen LJG Van der 3834 | K     | India      | FJ982158 | 0   | 1   |
| <i>Mimosa pseudocallosa</i> Burkart                                              | Ribas OS 5845           | HUEFS | Brazil     | FJ982159 | 4   | 3   |
| <i>Mimosa pseudoradula</i> Glaz. ex Barneby var. <i>pseudoradula</i>             | Simon MF 664            | UB    | Brazil     | FJ982160 | 3   | 3   |
| <i>Mimosa pseudosepiaria</i> Harms                                               | Simon MF 712            | FHO   | Brazil     | FJ982161 | 2   | 6   |
| <i>Mimosa pseudosetososa</i> sp. nov. ined.*                                     | Simon MF 864            | FHO   | Brazil     | FJ982162 | 3   | 4   |
| <i>Mimosa psilocarpa</i> B.L.Rob.                                                | Martínez-Bernal A 933   | UAMIZ | Mexico     | FJ982163 | 0   | 1   |
| <i>Mimosa psoralea</i> Benth.                                                    | Phillipson PB 3571      | K     | Madagascar | FJ982164 | 0   | 1   |
| <i>Mimosa pteridifolia</i> Benth.                                                | Simon MF 754            | FHO   | Brazil     | FJ982165 | 3   | 1   |

## Appendix S1 (cont.)

|                                                                                                 |                        |       |            |          |     |     |
|-------------------------------------------------------------------------------------------------|------------------------|-------|------------|----------|-----|-----|
| <i>Mimosa pudica</i> L.                                                                         | Simon MF 669           | UB    | Brazil     | FJ982166 | W   | 0,1 |
| <i>Mimosa purpusii</i> Brandegee                                                                | Simon MF 841           | MEXU  | Mexico     | FJ982167 | 0   | 1   |
| <i>Mimosa pyreneae</i> Taub.                                                                    | Simon MF 678           | UB    | Brazil     | FJ982168 | 3   | 3   |
| <i>Mimosa quadrivalvis</i> L. var. <i>quadrivalvis</i>                                          | Camargo-Ricalde SL 532 | UAMIZ | Mexico     | FJ982169 | 2   | 0   |
| <i>Mimosa radula</i> Benth. var. <i>imbricata</i> (Benth.) Barneby                              | Simon MF 731           | FHO   | Brazil     | FJ982170 | 3   | 3   |
| <i>Mimosa ramboi</i> Burkart                                                                    | Queiroz LP 12530       | HUEFS | Brazil     | FJ982171 | 4   | 1   |
| <i>Mimosa ramulosa</i> Benth.                                                                   | Queiroz LP 12340       | HUEFS | Brazil     | FJ982172 | 4   | 1   |
| <i>Mimosa regina</i> Barneby                                                                    | Simon MF 759           | FHO   | Brazil     | FJ982173 | 3   | 5   |
| <i>Mimosa revoluta</i> Benth.                                                                   | Hughes CE 2278         | FHO   | Bolivia    | FJ982174 | 0   | 1   |
| <i>Mimosa rhodocarpa</i> (Britton & Rose) R.Grether                                             | Hughes CE 2161         | FHO   | Mexico     | FJ982175 | 0   | 6   |
| <i>Mimosa robusta</i> R.Grether                                                                 | Simon MF 818           | MEXU  | Mexico     | FJ982176 | 1,2 | 1   |
| <i>Mimosa rubicaulis</i> Lam. ssp. <i>himalayana</i> (Gamble) H.Ohashi                          | Thomas SM 24/1         | K     | Nepal      | FJ982177 | 0   | 1   |
| <i>Mimosa rufescens</i> Benth. var. <i>rufescens</i>                                            | Ferreira GC 596        | K     | Brazil     | FJ982178 | 1   | 2   |
| <i>Mimosa rupertiana</i> B.L.Turner                                                             | Bye R 12884            | MEXU  | Mexico     | FJ982179 | 0   | 0   |
| <i>Mimosa rusbyana</i> Barneby & Fortunato                                                      | Sarkinen T 2071        | FHO   | Bolivia    | FJ982180 | 0   | 1   |
| <i>Mimosa scabrella</i> Benth.                                                                  | Lima HC 4055           | RB    | Brazil     | FJ982181 | 1   | 6   |
| <i>Mimosa schleidenii</i> Herter                                                                | Queiroz LP 12348       | HUEFS | Brazil     | FJ982182 | 4   | 1   |
| <i>Mimosa schomburgkii</i> Benth.                                                               | Hellin JJ 15           | FHO   | Honduras   | FJ982183 | 1,2 | 6   |
| <i>Mimosa sensitiva</i> L. var. <i>sensitiva</i>                                                | Almeida D 4            | HUEFS | Brazil     | FJ982184 | W   | 2   |
| <i>Mimosa sericantha</i> Benth.                                                                 | Simon MF 410           | UB    | Brazil     | FJ982185 | 3   | 1   |
| <i>Mimosa setosa</i> Benth. var. <i>paludosa</i> (Benth.) Barneby                               | Simon MF 725           | FHO   | Brazil     | FJ982186 | 2   | 1   |
| <i>Mimosa setosa</i> Benth. var. <i>urbica</i> Barneby                                          | Simon MF 730           | FHO   | Brazil     | FJ982187 | 3   | 4   |
| <i>Mimosa setosissima</i> Taub.                                                                 | Simon MF 676           | UB    | Brazil     | FJ982188 | 3   | 1   |
| <i>Mimosa setuligera</i> Harms                                                                  | Simon MF 709           | FHO   | Brazil     | FJ982189 | 0   | 3   |
| <i>Mimosa sicyocarpa</i> B.L.Rob.                                                               | Calónico J 4936        | MEXU  | Mexico     | FJ982190 | 0   | 1   |
| <i>Mimosa similis</i> Britton & Rose                                                            | Simon MF 807           | MEXU  | Mexico     | FJ982191 | 0   | 1   |
| <i>Mimosa sinaloensis</i> Britton & Rose                                                        | Simon MF 828           | MEXU  | Mexico     | FJ982192 | 0   | 2   |
| <i>Mimosa skinneri</i> Benth. var. <i>desmodioides</i> (Benth.) Barneby                         | Simon MF 746           | FHO   | Brazil     | FJ982193 | 1,3 | 0   |
| <i>Mimosa somnians</i> Humb. & Bonpl. ex Willd. var. <i>lasiocarpa</i> (Benth.) Barneby         | Simon MF 736           | FHO   | Brazil     | FJ982194 | W   | 1   |
| <i>Mimosa sousae</i> R.Grether                                                                  | Martínez-Bernal A 918  | UAMIZ | Mexico     | FJ982195 | 0   | 1   |
| <i>Mimosa</i> sp.                                                                               | Dahmer N 15            | ICN   | Brazil     | FJ982196 | 0   | 1   |
| <i>Mimosa speciosissima</i> Taub.                                                               | Simon MF 753           | FHO   | Brazil     | FJ982197 | 3   | 4   |
| <i>Mimosa spirocarpa</i> Rose                                                                   | Simon MF 825           | MEXU  | Mexico     | FJ982198 | 0   | 1   |
| <i>Mimosa splendida</i> Barneby                                                                 | Simon MF 739           | FHO   | Brazil     | FJ982199 | 3   | 5   |
| <i>Mimosa sprengelii</i> DC.                                                                    | Queiroz LP 12469       | HUEFS | Brazil     | FJ982200 | 4   | 1   |
| <i>Mimosa strigillosa</i> Torr. & A.Gray                                                        | Lievens AW 2666        | MEXU  | USA        | FJ982201 | 2   | 1   |
| <i>Mimosa strobiliflora</i> Burkart                                                             | Ribas OS 3600          | HUEFS | Brazil     | FJ982202 | 1   | 1   |
| <i>Mimosa stylosa</i> Barneby                                                                   | Dutra VF 318           | VIC   | Brazil     | FJ982203 | 3   | 1   |
| <i>Mimosa tejupilcana</i> R.Grether & A.Martínez-Bernal                                         | Montaño-Arias S 16     | UAMIZ | Mexico     | FJ982204 | 7   | 1   |
| <i>Mimosa tenuiflora</i> (Willd.) Poir.                                                         | Simon MF 698           | FHO   | Brazil     | FJ982205 | 0   | 1,6 |
| <i>Mimosa tequilana</i> S.Watson                                                                | Simon MF 813           | MEXU  | Mexico     | FJ982206 | 0   | 0   |
| <i>Mimosa texana</i> Small var. <i>filipes</i> (Britton & Rose) Barneby                         | Simon MF 845           | MEXU  | Mexico     | FJ982207 | 0   | 1   |
| <i>Mimosa texana</i> Small var. <i>texana</i>                                                   | Simon MF 803           | MEXU  | Mexico     | FJ982208 | 0   | 1   |
| <i>Mimosa torresiae</i> R.Grether                                                               | Torres-Colin R 10040   | MEXU  | Mexico     | FJ982209 | 0   | 1   |
| <i>Mimosa townsendii</i> Barneby                                                                | Lewis GP 3025          | K     | Ecuador    | FJ982210 | 0   | 6   |
| <i>Mimosa tricephala</i> Cham. & Schltld. var. <i>nelsonii</i> (B.L.Rob.) Chehaibar & R.Grether | Martínez-Bernal A 920  | UAMIZ | Mexico     | FJ982211 | 0   | 1   |
| <i>Mimosa ulbrichiana</i> Harms                                                                 | Simon MF 710           | FHO   | Brazil     | FJ982212 | 0   | 1   |
| <i>Mimosa ulei</i> Taub. var. <i>grallator</i> Barneby                                          | Simon MF 777           | FHO   | Brazil     | FJ982213 | 3   | 3   |
| <i>Mimosa uliginosa</i> Chod. & Hassl.                                                          | Queiroz LP 12608       | HUEFS | Brazil     | FJ982214 | 4   | 1   |
| <i>Mimosa unipinnata</i> B.D.Parfitt & Pinkava                                                  | Carranza MA 2355       | MEXU  | Mexico     | FJ982215 | 0   | 1   |
| <i>Mimosa uraguensis</i> Hook. & Arn.                                                           | Simon MF 862           | FHO   | cultivated | FJ982216 | 1   | 1   |
| <i>Mimosa ursina</i> Mart.                                                                      | Simon MF 704           | FHO   | Brazil     | FJ982217 | 0   | 3   |
| <i>Mimosa velloziana</i> Mart. var. <i>velloziana</i>                                           | Simon MF 721           | FHO   | Brazil     | FJ982218 | W   | 2   |
| <i>Mimosa venatorum</i> Barneby                                                                 | Simon MF 740           | FHO   | Brazil     | FJ982219 | 3   | 3   |
| <i>Mimosa verecunda</i> Benth.                                                                  | Simon MF 749           | FHO   | Brazil     | FJ982220 | 3   | 1   |
| <i>Mimosa verrucosa</i> Benth.                                                                  | Simon MF 706           | FHO   | Brazil     | FJ982221 | 0   | 1   |
| <i>Mimosa vestita</i> Benth.                                                                    | Simon MF 769           | FHO   | Brazil     | FJ982222 | 3   | 3   |
| <i>Mimosa vilersii</i> Drake                                                                    | Labat J-N 3020         | K     | Madagascar | FJ982223 | 0   | 1   |
| <i>Mimosa viperina</i> sp. nov. ined.*                                                          | Simon MF 461           | FHO   | Brazil     | FJ982224 | 3   | 3   |
| <i>Mimosa virgula</i> Barneby                                                                   | Silva MA 5134          | UB    | Brazil     | FJ982225 | 3   | 3   |
| <i>Mimosa volubilis</i> Villiers                                                                | Du Puy DJ M739         | K     | Madagascar | FJ982226 | 0   | 2   |
| <i>Mimosa waterlotii</i> R.Vig.                                                                 | Schrire BD 2551        | K     | Madagascar | FJ982227 | 0   | 1   |
| <i>Mimosa watsonii</i> B.L.Rob.                                                                 | Simon MF 857           | MEXU  | Mexico     | FJ982228 | 1   | 2   |
| <i>Mimosa weberbaueri</i> Harms                                                                 | Hughes CE 2043         | FHO   | Peru       | FJ982229 | 0   | 1   |
| <i>Mimosa weddelliana</i> Benth.                                                                | Ritter N 4604          | MO    | Bolivia    | FJ982230 | 2   | 1   |
| <i>Mimosa woodii</i> Atahuachi & C.E.Hughes                                                     | Hughes CE 2285         | FHO   | Bolivia    | FJ982231 | 0   | 1   |

## Appendix S1 (cont.)

|                                                                             |                           |       |         |          |   |     |
|-----------------------------------------------------------------------------|---------------------------|-------|---------|----------|---|-----|
| <i>Mimosa xanthocentra</i> Mart. var. <i>subsericea</i> (Benth.)<br>Barneby | Hughes CE 2403            | FHO   | Bolivia | FJ982232 | W | 3   |
| <i>Mimosa xavantinae</i> Barneby                                            | Farias R 346              | UB    | Brazil  | FJ982233 | 3 | 1   |
| <i>Mimosa zygophylla</i> Benth.                                             | Camargo-Ricalde SL<br>525 | UAMIZ | Mexico  | FJ982234 | 0 | 1   |
| <i>Parapiptadenia excelsa</i> (Griseb.) Burkart                             | Hughes CE 2425            | FHO   | Bolivia | FJ982235 | 0 | 6   |
| <i>Piptadenia adiantoides</i> (Spreng.) Macbride                            | Simon MF 726              | FHO   | Brazil  | FJ982236 | 1 | 1,2 |
| <i>Piptadenia buchtienii</i> Barneby                                        | Hughes CE 2427            | FHO   | Bolivia | FJ982237 | 0 | 6   |
| <i>Piptadenia gonoacantha</i> (Mart.) Macbride                              | Simon MF 735              | FHO   | Brazil  | FJ982238 | 1 | 6   |
| <i>Piptadenia stipulacea</i> (Benth.) Ducke                                 | Simon MF 702              | FHO   | Brazil  | FJ982239 | 0 | 1   |
| <i>Piptadenia trisperma</i> (Vell.) Benth.                                  | Armstrong KE 512          | FHO   | Brazil  | FJ982240 | 1 | 1,2 |
| <i>Piptadenia viridiflora</i> Benth.                                        | Hughes CE 1681            | FHO   | Mexico  | FJ982241 | 0 | 6   |
| <i>Pityrocarpa moniliformis</i> Benth.                                      | Way MJ SWM2449            | K     | Brazil  | FJ982242 | 0 | 6   |
| <i>Pityrocarpa obliqua</i> Macbride                                         | Macqueen DJ 439           | K     | Mexico  | FJ982243 | 0 | 6   |
| <i>Stryphnodendron adstringens</i> (Mart.) Coville                          | Simon MF 734              | FHO   | Brazil  | FJ982244 | 3 | 6   |
| <i>Stryphnodendron obovatum</i> Benth.                                      | Hughes CE 2397            | FHO   | Bolivia | FJ982245 | 0 | 6   |

**Appendix S2.** *Andira* dataset: species sampled in this study, voucher information, GenBank accession number for ITS sequences, biome, habit and bark type (see text for coding). Herbarium acronyms follow Holmgren *et al.* (90).

| Species                                                 | Voucher             | Herbarium | Country    | GenBank accession number | Biome | Habit | Corky bark |
|---------------------------------------------------------|---------------------|-----------|------------|--------------------------|-------|-------|------------|
| <i>Andira antheimia</i> (Vell.) Benth.                  | Jardin J 568        | CEPEC     | Brazil     | FJ542764                 | 1     | 6     | 0          |
| <i>Andira antheimia</i> (Vell.) Benth.                  | Pennington RT 227   | FHO       | Brazil     | FJ542763                 | 1     | 6     | 0          |
| <i>Andira carvalhoi</i> R.T.Penn. & H.C.Lima (copy 1)   | Pennington RT 233   | FHO       | Brazil     | FJ542765                 | 1     | 1     | 0          |
| <i>Andira carvalhoi</i> R.T.Penn. & H.C.Lima (copy 2)   | Pennington RT 233   | FHO       | Brazil     | FJ542766                 | 1     | 1     | 0          |
| <i>Andira cordata</i> Arroyo ex. R.T.Penn. & H.C.Lima   | Pennington RT 264   | FHO       | Brazil     | FJ542767                 | 3     | 6     | 1          |
| <i>Andira cujabensis</i> Benth.                         | Pennington RT 503   | UB        | Brazil     | FJ542768                 | 1,3   | 6     | 1          |
| <i>Andira fraxinifolia</i> Benth.                       | Pennington RT 236   | FHO       | Brazil     | FJ542770                 | 1     | 1     | 0          |
| <i>Andira fraxinifolia</i> Benth.                       | Sugiyama M 889      | K         | Brazil     | FJ542769                 | 1     | 1     | 0          |
| <i>Andira galeottiana</i> Standl.                       | Rico L sn           | K         | Brazil     | FJ542762                 | 1,2   | 6     | 0          |
| <i>Andira galeottiana</i> Standl.                       | Lavin M 8214        | MEXU      | Mexico     | US59889                  | 1,2   | 6     | 0          |
| <i>Andira grandistipula</i> Amshoff (copy 1)            | Hoffman B 1992      | US        | Brazil     | FJ542771                 | 3     | 6     | ?          |
| <i>Andira grandistipula</i> Amshoff (copy 2)            | Hoffman B 1992      | US        | Brazil     | FJ542772                 | 3     | 6     | ?          |
| <i>Andira humilis</i> Mart. ex. Benth.                  | Pennington RT 239   | FHO       | Brazil     | FJ542773                 | 3     | 4     | 0          |
| <i>Andira humilis</i> Mart. ex. Benth.                  | Pennington RT 246   | FHO       | Brazil     | FJ542774                 | 3     | 4     | 0          |
| <i>Andira humilis</i> Mart. ex. Benth.                  | Pennington RT 268   | FHO       | Brazil     | FJ542776                 | 3     | 4     | 0          |
| <i>Andira humilis</i> Mart. ex. Benth.                  | Pennington RT 269   | FHO       | Brazil     | FJ542775                 | 3     | 4     | 0          |
| <i>Andira inermis</i> (W. Wright) DC.                   | Bridgewater S 347   | E         | Belize     | FJ542781                 | 0,1,2 | 6     | 0          |
| <i>Andira inermis</i> (W. Wright) DC. (copy 1)          | Cheek M 3579        | K         | Cameroon   | FJ542782                 | 0,1,2 | 6     | 0          |
| <i>Andira inermis</i> (W. Wright) DC. (copy 2)          | Cheek M 3579        | K         | Cameroon   | FJ542783                 | 0,1,2 | 6     | 0          |
| <i>Andira inermis</i> (W. Wright) DC. (copy 1)          | Gardener M 6619     | E         | Mexico     | FJ542777                 | 0,1,2 | 6     | 0          |
| <i>Andira inermis</i> (W. Wright) DC. (copy 2)          | Gardener M 6619     | E         | Brazil     | FJ542778                 | 0,1,2 | 6     | 0          |
| <i>Andira inermis</i> (W. Wright) DC.                   | Hughes CE 1673      | FHO       | Mexico     | FJ542784                 | 0,1,2 | 6     | 0          |
| <i>Andira inermis</i> (W. Wright) DC.                   | Pennington RT 589   | E         | Costa Rica | FJ542780                 | 0,1,2 | 6     | 0          |
| <i>Andira inermis</i> (W. Wright) DC.                   | Pennington TD 13358 | K         | Costa Rica | FJ542779                 | 0,1,2 | 6     | 0          |
| <i>Andira jaliscensis</i> R.T.Penn. (copy 1)            | Magallanes JAS 4404 | NY        | Mexico     | FJ542785                 | 0     | 6     | ?          |
| <i>Andira jaliscensis</i> R.T.Penn. (copy 2)            | Magallanes JAS 4404 | NY        | Mexico     | FJ542786                 | 0     | 6     | ?          |
| <i>Andira legalis</i> (Vell.) Toledo                    | Pennington RT 307   | FHO       | Brazil     | FJ542787                 | 1     | 6     | 0          |
| <i>Andira macrothyrsa</i> Ducke                         | Pennington RT 1207  | E         | Peru       | FJ542789                 | 1     | 6     | 0          |
| <i>Andira macrothyrsa</i> Ducke (copy 1)                | Pennington RT 523   | E         | Peru       | FJ542791                 | 1     | 6     | 0          |
| <i>Andira macrothyrsa</i> Ducke (copy 2)                | Pennington RT 523   | E         | Peru       | FJ542792                 | 1     | 6     | 0          |
| <i>Andira macrothyrsa</i> Ducke                         | Pennington TD 13550 | K         | Brazil     | FJ542790                 | 1     | 6     | 0          |
| <i>Andira marauensis</i> N.F.Santos                     | Carvalho AM sn      | CEPEC     | Brazil     | FJ542788                 | 1     | 6     | 0          |
| <i>Andira micrantha</i> Ducke                           | Rodrigues W 11180   | INPA      | Brazil     | FJ542793                 | 1     | 6     | 0          |
| <i>Andira multistipula</i> Ducke                        | Pennington RT 537   | E         | Ecuador    | FJ542794                 | 1     | 6     | 0          |
| <i>Andira nitida</i> Mart. ex. Benth.                   | Carvalho AM 3309    | CEPEC     | Brazil     | FJ542795                 | 1     | 1     | 0          |
| <i>Andira nitida</i> Mart. ex. Benth.                   | Pennington RT 292   | FHO       | Brazil     | FJ542796                 | 1     | 1     | 0          |
| <i>Andira nitida</i> Mart. ex. Benth.                   | Pennington RT 301   | FHO       | Brazil     | FJ542797                 | 1     | 1     | 0          |
| <i>Andira ormosioides</i> Benth.                        | Lima HC 4831        | RB        | Brazil     | FJ542798                 | 1     | 6     | 0          |
| <i>Andira parviflora</i> Ducke                          | Rodrigues W 11179   | INPA      | Brazil     | FJ542799                 | 1     | 6     | 0          |
| <i>Andira praecox</i> Arroyo ex. R.T.Penn.              | Rabelo BV 3199      | K         | Brazil     | FJ542800                 | 1     | 6     | ?          |
| <i>Andira surinamensis</i> (Bondt) Splitg. ex. Amshoff  | Gardener M 6630     | E         | Trinidad   | FJ542801                 | 1,2   | 6     | 0          |
| <i>Andira surinamensis</i> (Bondt) Splitg. ex. Amshoff  | Pennington RT 433   | FHO       | Guyana     | FJ542802                 | 1,2   | 6     | 0          |
| <i>Andira surinamensis</i> (Bondt) Splitg. ex. Amshoff  | Pennington RT 463   | FHO       | Guyana     | FJ542803                 | 1,2   | 6     | 0          |
| <i>Andira taurotesticulata</i> R.T.Penn.                | Pennington RT 525   | E         | Ecuador    | FJ542804                 | 1     | 6     | 0          |
| <i>Andira tervequinata</i> R.T.Penn., Aymard & N.Cuello | Liesner R 20674     | E         | Venezuela  | FJ542805                 | 1,3   | 6     | ?          |
| <i>Andira trifoliolata</i> Ducke                        | Coomes D 81         | K         | Venezuela  | FJ542806                 | 1     | 6     | 0          |
| <i>Andira unifoliolata</i> Ducke                        | Rodrigues W 11186   | INPA      | Brazil     | FJ542807                 | 1     | 6     | 0          |
| <i>Andira vermifuga</i> (Mart.) Benth.                  | Pennington RT 271   | FHO       | Brazil     | FJ542808                 | 3     | 1     | 1          |
| <i>Hymenolobium alagoanum</i> Ducke                     | Pennington RT 224   | E         | Brazil     | FJ542758                 | 1     | 6     | 0          |
| <i>Hymenolobium flavum</i> Kleinhoonte                  | Pennington RT 451   | K         | Guyana     | FJ542760                 | 1     | 6     | 0          |
| <i>Hymenolobium mesoamericanum</i> H.C.Lima             | Pennington RT 614   | E         | Costa Rica | AF187087                 | 1     | 6     | 0          |
| <i>Hymenolobium nitidum</i> Benth.                      | Rodrigues W 11177   | INPA      | Brazil     | FJ542759                 | 1     | 6     | 0          |
| <i>Hymenolobium</i> sp.                                 | Pennington TD 16995 | K         | Peru       | FJ542761                 | 1     | 6     | 0          |



**Appendix S3.** *Lupinus* dataset: species sampled in this study and biome (see text for coding). Voucher information and GenBank accession numbers are presented in Hughes & Eastwood (16).

| Species                                 | Biome |
|-----------------------------------------|-------|
| <i>Genista anglica</i>                  | 5     |
| <i>Genista pilosa</i>                   | 5     |
| <i>Genista tenera</i>                   | 6     |
| <i>Genista umbellata</i>                | 6     |
| <i>Lupinus</i> aff. <i>bangii</i>       | 7     |
| <i>Lupinus</i> aff. <i>ramosissimus</i> | 7     |
| <i>Lupinus</i> aff. <i>sarmentosus</i>  | 7     |
| <i>Lupinus albescens</i>                | 4     |
| <i>Lupinus albus</i>                    | 6     |
| <i>Lupinus andersonii</i>               | 5     |
| <i>Lupinus angustifolius</i>            | 6     |
| <i>Lupinus arboreus</i>                 | 5     |
| <i>Lupinus argenteus</i>                | 5     |
| <i>Lupinus arizonicus</i>               | 6     |
| <i>Lupinus arvensis</i>                 | 7     |
| <i>Lupinus ballianus</i>                | 7     |
| <i>Lupinus bandelierae</i>              | 7     |
| <i>Lupinus bangii</i>                   | 7     |
| <i>Lupinus bicolor</i>                  | 5     |
| <i>Lupinus bracteolaris</i>             | 4     |
| <i>Lupinus breweri</i>                  | 5     |
| <i>Lupinus carpapaticus</i>             | 7     |
| <i>Lupinus chachas</i>                  | 7     |
| <i>Lupinus chamissonis</i>              | 5     |
| <i>Lupinus chrysanthus</i>              | 7     |
| <i>Lupinus concinnus</i>                | 6     |
| <i>Lupinus cosentinii</i>               | 6     |
| <i>Lupinus crotalarioides</i>           | 3     |
| <i>Lupinus cumulicola</i>               | 4     |
| <i>Lupinus densiflorus</i>              | 6     |
| <i>Lupinus digitatus</i>                | 6     |
| <i>Lupinus gibertianus</i>              | 4     |
| <i>Lupinus grayi</i>                    | 5     |
| <i>Lupinus guaraniticus</i>             | 3,4   |
| <i>Lupinus harvardii</i>                | 4     |
| <i>Lupinus hirsutissimus</i>            | 6     |
| <i>Lupinus hispanicus</i>               | 6     |
| <i>Lupinus huaronensis</i>              | 7     |
| <i>Lupinus huigrensis</i>               | 7     |
| <i>Lupinus lactus</i>                   | 5     |
| <i>Lupinus lanatus</i>                  | 4     |
| <i>Lupinus latifolius</i>               | 5     |
| <i>Lupinus lepidus</i>                  | 5     |
| <i>Lupinus lindleyanus</i>              | 7     |
| <i>Lupinus linearis</i>                 | 4     |
| <i>Lupinus luteus</i>                   | 6     |
| <i>Lupinus magnistipulatus</i>          | 4     |
| <i>Lupinus mantaroensis</i>             | 7     |
| <i>Lupinus micranthus</i>               | 6     |
| <i>Lupinus microcarpus</i>              | 6     |
| <i>Lupinus microphyllus</i>             | 7     |
| <i>Lupinus misticola</i>                | 7     |

| Species                          | Biome |
|----------------------------------|-------|
| <i>Lupinus mollendoensis</i>     | 0     |
| <i>Lupinus montanus</i>          | 7     |
| <i>Lupinus multiflorus</i>       | 4     |
| <i>Lupinus mutabilis</i>         | 7     |
| <i>Lupinus neomexicanus</i>      | 5     |
| <i>Lupinus nubigenus</i>         | 7     |
| <i>Lupinus odoratus</i>          | 6     |
| <i>Lupinus paraguariensis</i>    | 4     |
| <i>Lupinus paranensis</i>        | 4     |
| <i>Lupinus parvifolius</i>       | 3     |
| <i>Lupinus piurensis</i>         | 7     |
| <i>Lupinus polyphyllus</i>       | 5     |
| <i>Lupinus praestabilis</i>      | 7     |
| <i>Lupinus prostratus</i>        | 7     |
| <i>Lupinus pubescens</i>         | 7     |
| <i>Lupinus pulvinaris</i>        | 7     |
| <i>Lupinus purosericeus</i>      | 7     |
| <i>Lupinus reitzii</i>           | 4     |
| <i>Lupinus rivularis</i>         | 5     |
| <i>Lupinus rubriflorus</i>       | 4     |
| <i>Lupinus semperflorens</i>     | 7     |
| <i>Lupinus sericeus</i>          | 5     |
| <i>Lupinus sierrae-blancae</i>   | 5     |
| <i>Lupinus solangorum</i>        | 7     |
| <i>Lupinus</i> sp. CEH2002       | 7     |
| <i>Lupinus</i> sp. CEH2004       | 7     |
| <i>Lupinus</i> sp. CEH2005       | 7     |
| <i>Lupinus</i> sp. CEH2037       | 7     |
| <i>Lupinus</i> sp. CEH2107       | 7     |
| <i>Lupinus</i> sp. CEH2117       | 7     |
| <i>Lupinus</i> sp. CEH2118       | 7     |
| <i>Lupinus</i> sp. CEH2160       | 7     |
| <i>Lupinus</i> sp. RJE168        | 7     |
| <i>Lupinus</i> sp. RJE174        | 7     |
| <i>Lupinus</i> sp. RJE206        | 7     |
| <i>Lupinus</i> sp. RJE59         | 7     |
| <i>Lupinus subacaulis</i>        | 7     |
| <i>Lupinus subsessilis</i>       | 3     |
| <i>Lupinus tarapacensis</i>      | 7     |
| <i>Lupinus texensis</i>          | 4     |
| <i>Lupinus tominensis</i>        | 7     |
| <i>Lupinus truncatus</i>         | 6     |
| <i>Lupinus uleanus</i>           | 4     |
| <i>Lupinus velutinus</i>         | 3     |
| <i>Lupinus villosus</i>          | 4     |
| <i>Lupinus weberbaueri</i>       | 7     |
| <i>Pterospartum tridentatum</i>  | 6     |
| <i>Retama monosperma</i>         | 6     |
| <i>Spartium junceum</i>          | 6     |
| <i>Stauracanthus genistoides</i> | 6     |

**Appendix S4.** Microlicieae dataset: species sampled in this study and biome (see text for coding). Voucher information and GenBank accession numbers are presented in Fritsch *et al.* (18).

| Species                                  | Biome |
|------------------------------------------|-------|
| <i>Amphiblemma cymosum</i>               | 1     |
| <i>Arthrostemma ciliatum</i>             | 1     |
| <i>Astronia smilacifolia</i>             | 1     |
| <i>Bertolonia maculata</i>               | 1     |
| <i>Blakea trinervia</i>                  | 1     |
| <i>Cambessedesia</i>                     | 2,3   |
| <i>Castratella piloselloides</i>         | 2     |
| <i>Chaetostoma cupressinum</i>           | 3     |
| <i>Chaetostoma</i> sp.                   | 3     |
| <i>Clidemia rubra</i>                    | 1     |
| <i>Dichaetanthera asperrima</i>          | 1     |
| <i>Diplectria divaricata</i>             | 1     |
| <i>Dissotis rotundifolia</i>             | 1,2   |
| <i>Driessenia glanduligera</i>           | 1     |
| <i>Eriocnema fulva</i>                   | 1     |
| <i>Graffenrieda rotundifolia</i>         | 1     |
| <i>Gravesia</i> sp.                      | 1     |
| <i>Heterocentron subtriplinervium</i>    | 1     |
| <i>Lavoisiera alba</i>                   | 3     |
| <i>Lavoisiera caryophyllea</i>           | 3     |
| <i>Lavoisiera confertiflora</i>          | 3     |
| <i>Lavoisiera cordata</i>                | 3     |
| <i>Lavoisiera crassifolia</i>            | 3     |
| <i>Lavoisiera imbricata</i>              | 3     |
| <i>Lavoisiera mucorifera</i>             | 3     |
| <i>Lavoisiera subulata</i>               | 3     |
| <i>Leandra mexicana</i>                  | 1     |
| <i>Macrocentrum repens</i>               | 2     |
| <i>Maieta guianensis</i>                 | 1     |
| <i>Medinilla humbertiana</i>             | 1     |
| <i>Melastoma</i> sp.                     | 4     |
| <i>Memecylon edule</i>                   | 1     |
| <i>Meriania nobilis</i>                  | 1     |
| <i>Microlicia</i> aff. <i>oligantha</i>  | 3     |
| <i>Microlicia</i> aff. <i>tomentella</i> | 3     |
| <i>Microlicia amblysepala</i>            | 3     |
| <i>Microlicia fasciculata</i>            | 3     |
| <i>Microlicia juniperina</i>             | 3     |
| <i>Microlicia minima</i>                 | 3     |
| <i>Microlicia</i> sp.1                   | 3     |
| <i>Microlicia</i> sp.2                   | 3     |
| <i>Microlicia</i> sp.3                   | 3     |
| <i>Microlicia</i> sp.5                   | 3     |
| <i>Microlicia</i> sp.4                   | 3     |
| <i>Monochaetum calcaratum</i>            | 1     |
| <i>Monolena primuliflora</i>             | 1     |
| <i>Mouriri helleri</i>                   | 1     |
| <i>Osbeckia chinensis</i>                | 4     |
| <i>Pternandra caerulescens</i>           | 1     |
| <i>Pterolepis glomerata</i>              | 1,2,3 |
| <i>Rhexia virginica</i>                  | 2     |
| <i>Rhynchanthera grandiflora</i>         | 2     |
| <i>Stenodon suberosus</i>                | 3     |
| <i>Tetrazygia urbanii</i>                | 1     |
| <i>Tibouchina urvilleana</i>             | 1,2,3 |
| <i>Trembleya laniflora</i>               | 2,3   |
| <i>Trembleya parviflora 1</i>            | 2     |
| <i>Trembleya parviflora 2</i>            | 2     |
| <i>Trembleya pentagona</i>               | 2,3   |
| <i>Triolena</i> sp.                      | 1     |

## Captions for Supporting Figures

**Fig. S1.** Legume *matK* chronogram from one of the 2000 Bayesian trees sampled at stationarity. Posterior probability values are shown next to nodes. Letters on nodes correspond to calibration points derived from the fossil record. Diamonds are nodes that had the age estimated and were used as secondary calibration points in subsequent evolutionary rates analyses of *Mimosa*, *Andira* and *Lupinus*. Scale bar in million years.

**Fig. S2.** Chronograms showing one of 540 Bayesian trees sampled at stationarity for *Mimosa* (Fig. S2a), *Andira* (Fig. S2b), *Lupinus* (Fig. S2c) and Microlicieae (Fig. S2d). Posterior probability values are shown next to nodes. Squares correspond to constrained nodes used as calibration points, and red branches to Cerrado lineages. Scale bars in million years.

**Fig. S3.** Biome optimization in four plant groups (*Mimosa*, *Lupinus*, *Andira*, and Microlicieae). Aggregate biomes were optimized onto the 50% majority rule consensus tree of 540 Bayesian trees sampled at stationarity. Cerrado lineages are indicated on the right. Colour codes as given in Fig. S3a.

**Fig. S4.** Evolution of fire adapted life forms in *Mimosa* and *Andira* (Fig. S4a-b), and evolution of corky bark in *Andira* (Fig. S4c). Characters were optimized onto the 50% majority rule consensus tree of 540 Bayesian trees sampled at stationarity. Cerrado lineages are indicated on the right. Colour codes for Fig. S4b follow Fig. S4a.

Fig. S1

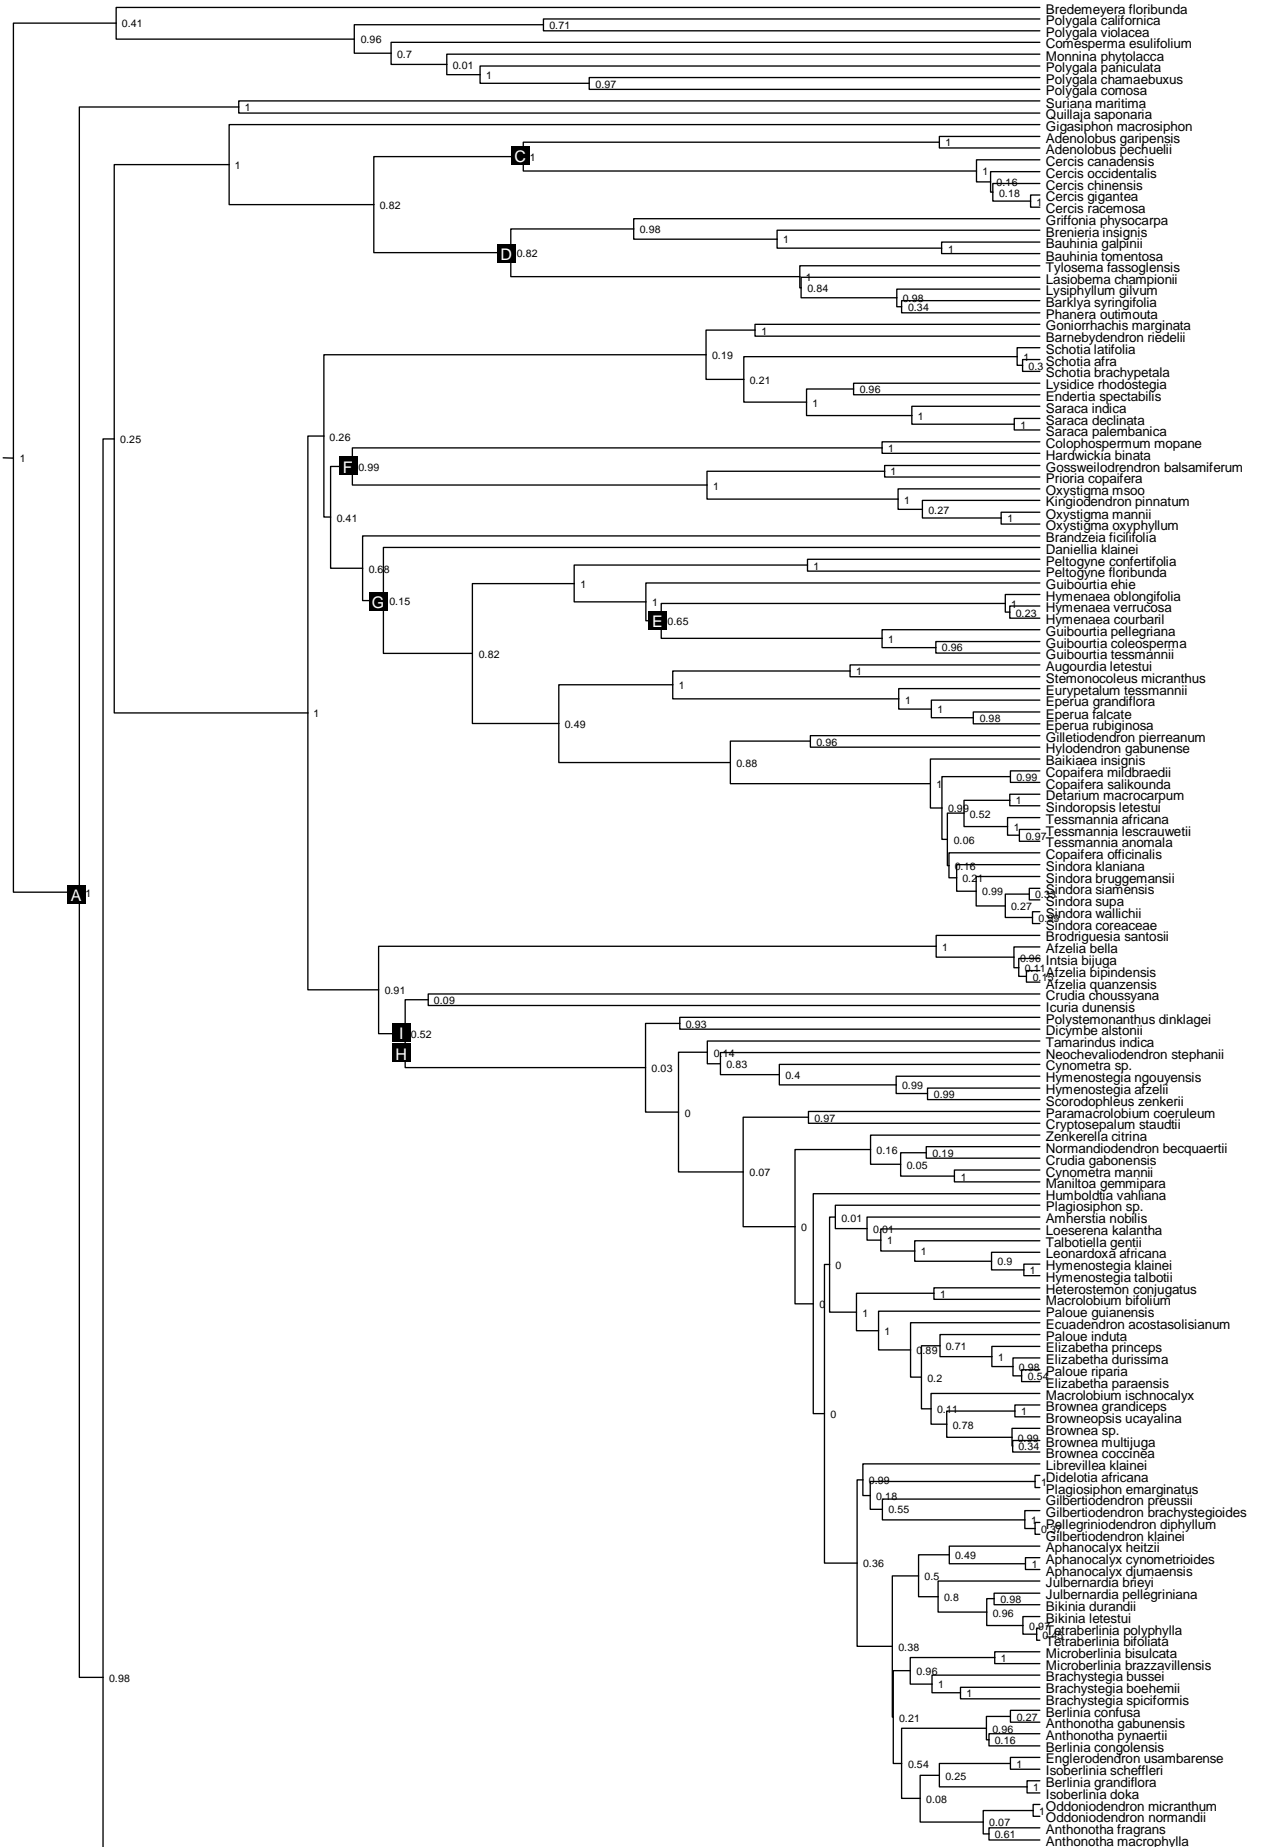

Fig. S1 (cont.)

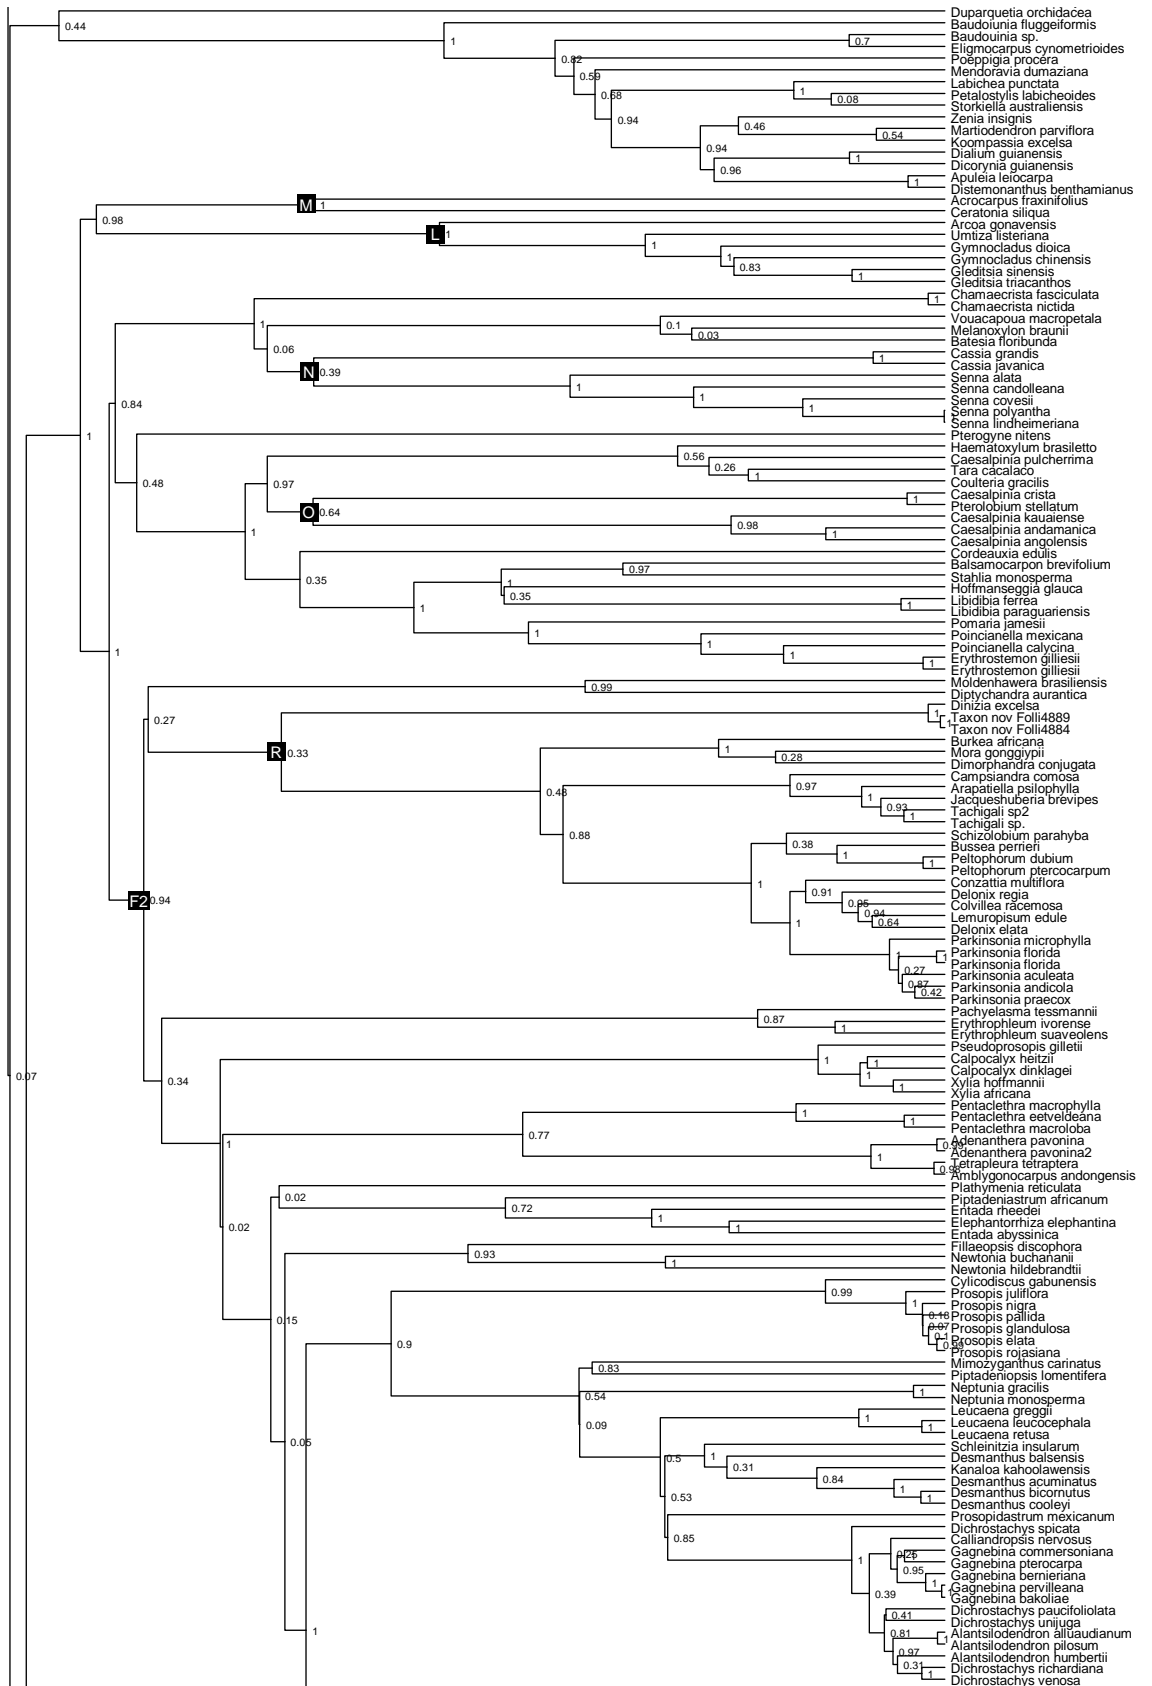

Fig. S1 (cont.)

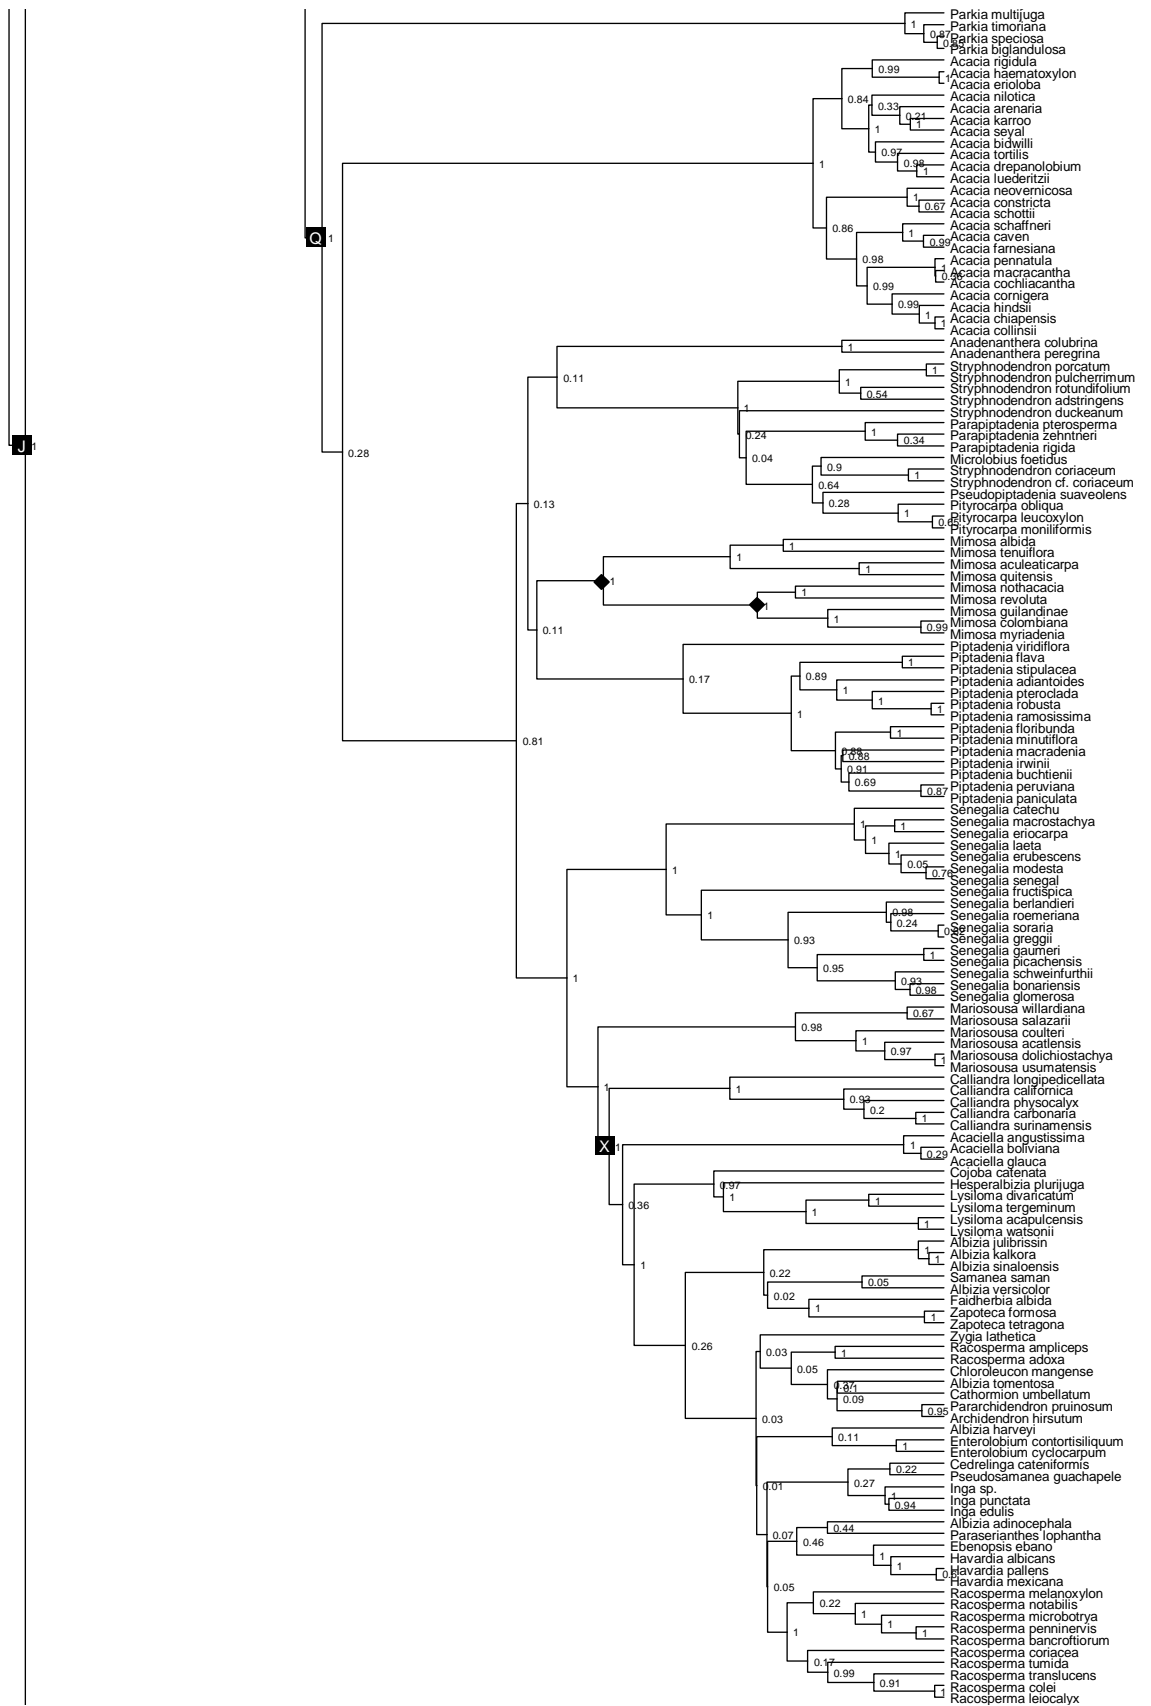

Fig. S1 (cont.)

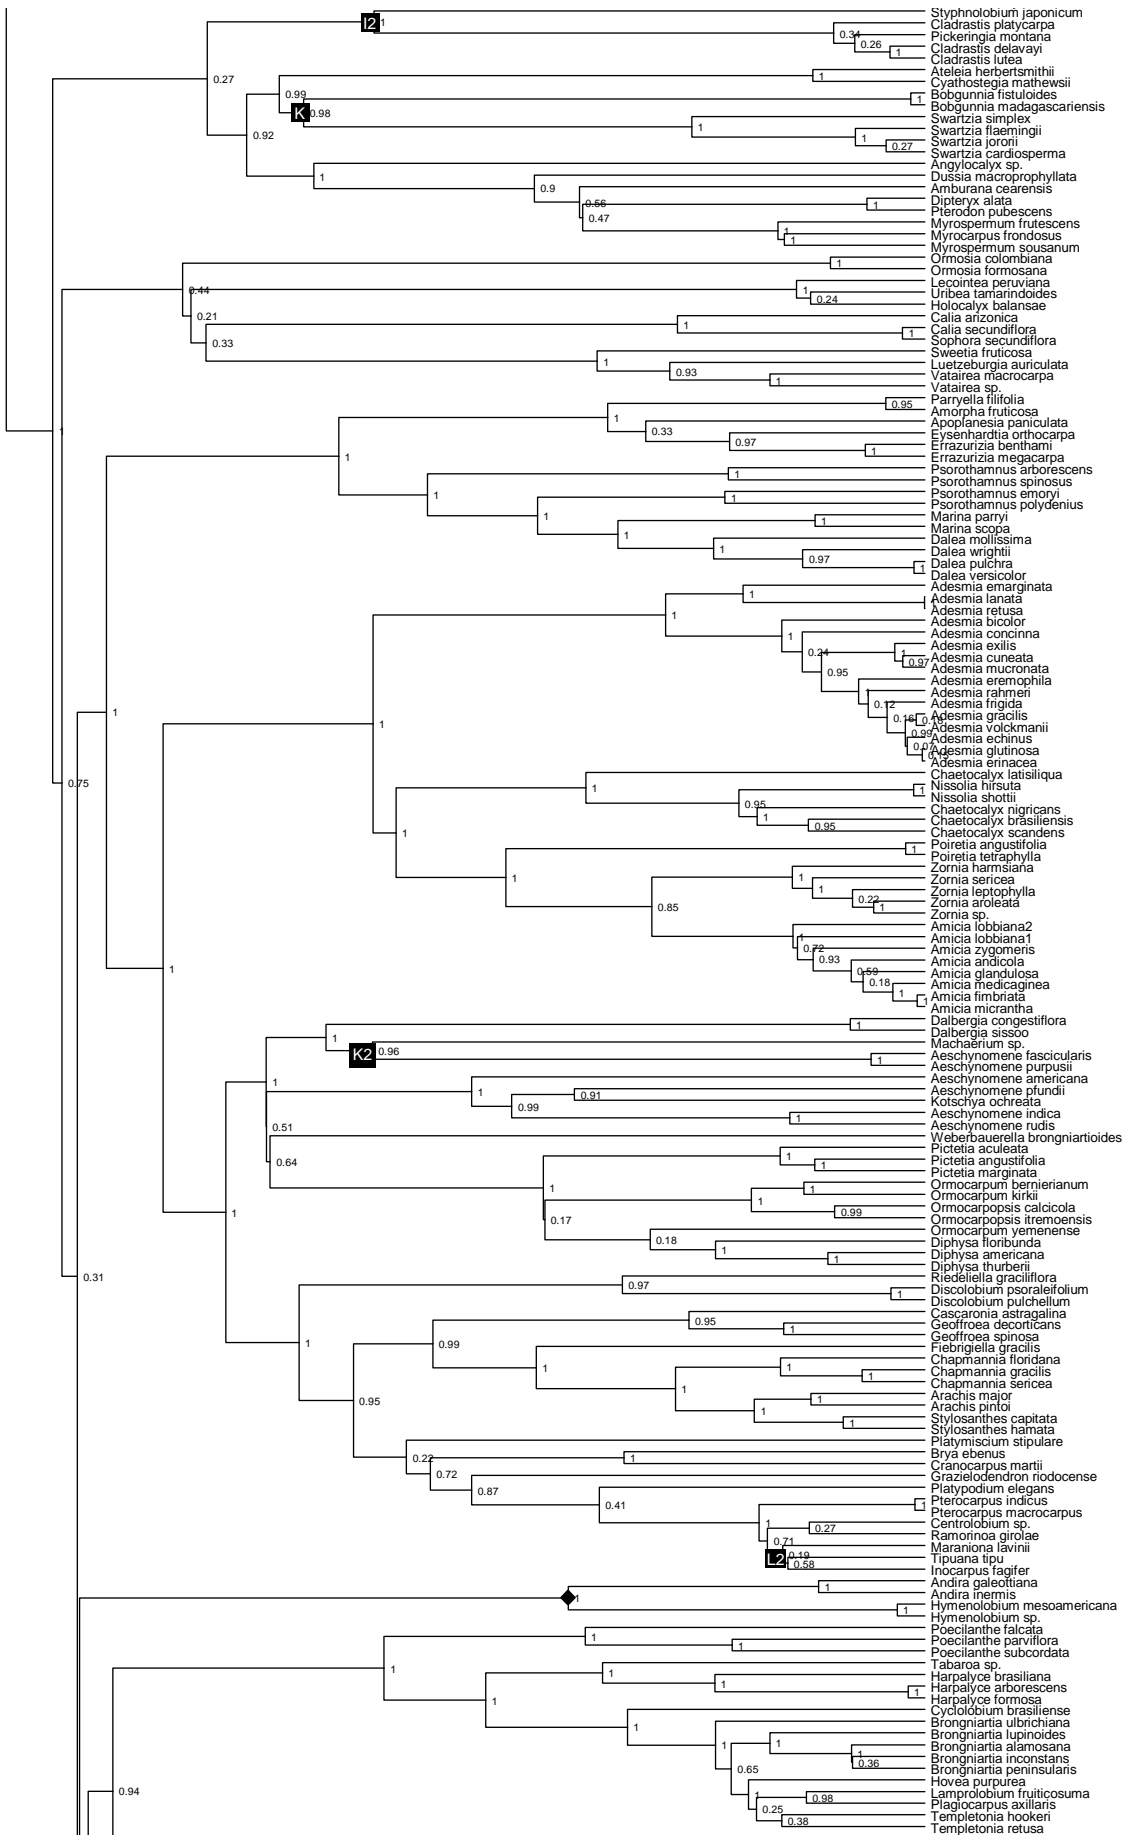

Fig. S1 (cont.)

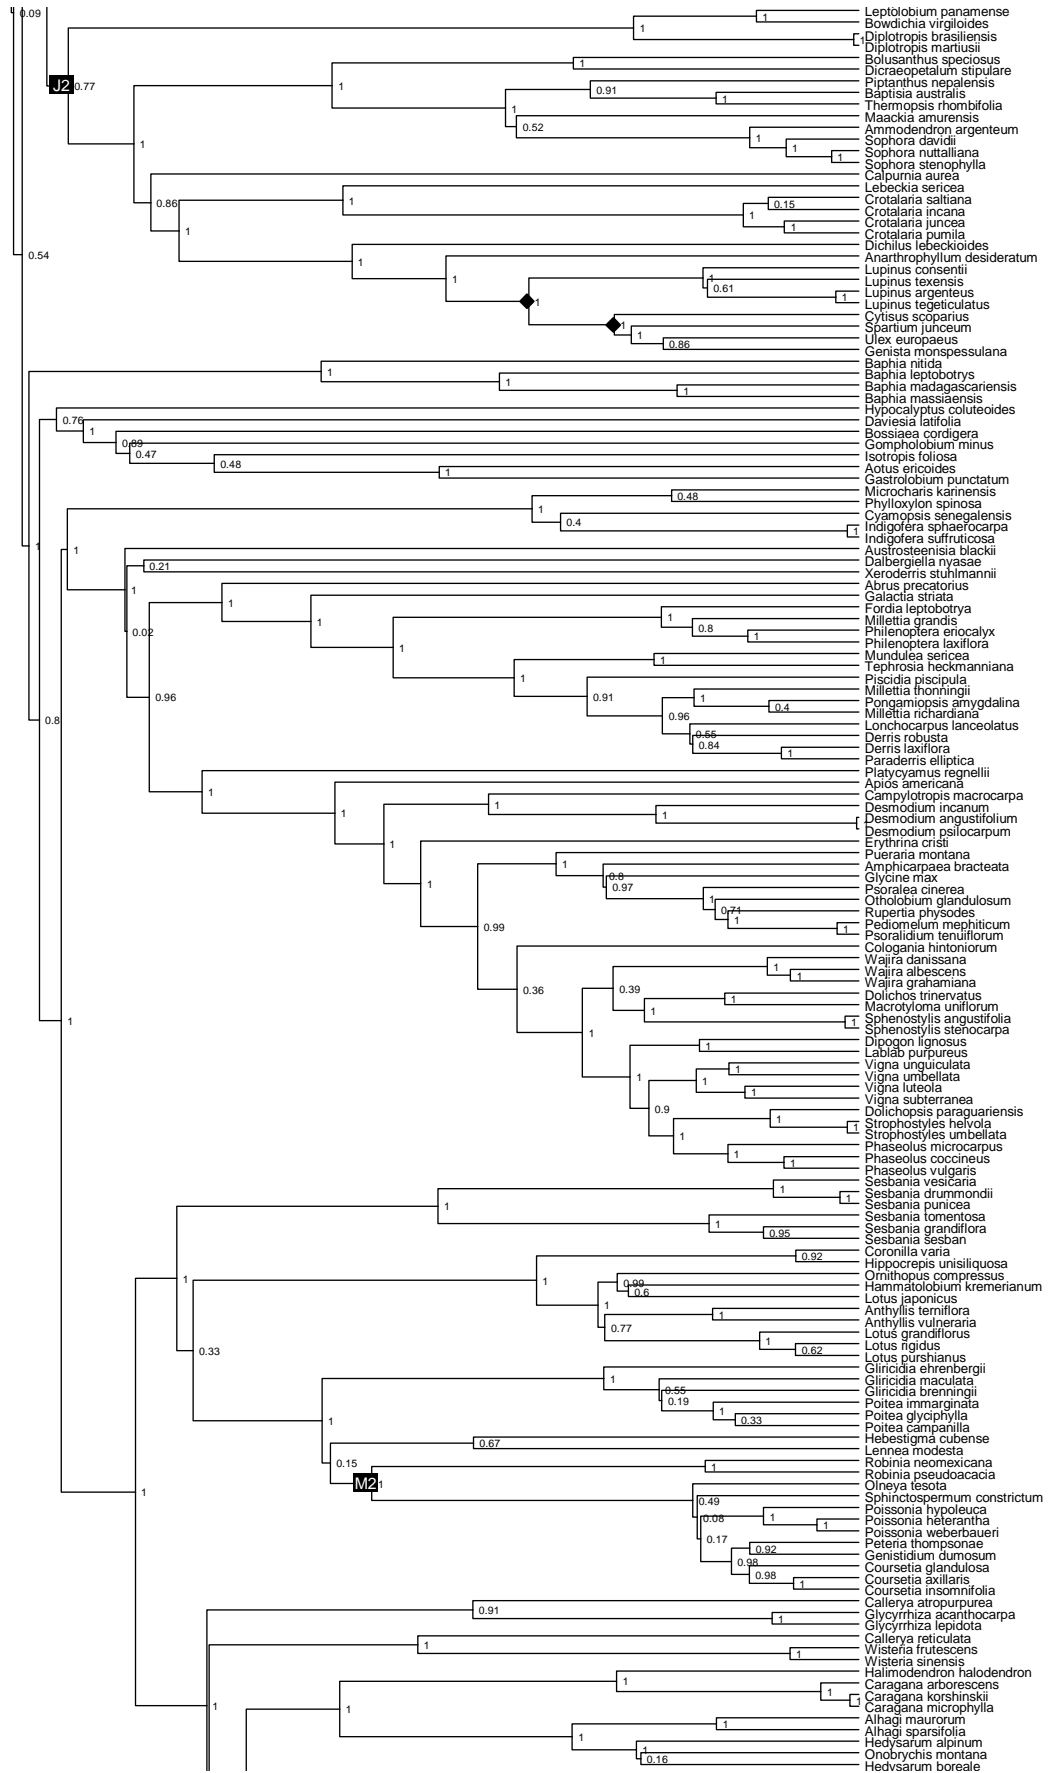



Fig. S1 (cont.)

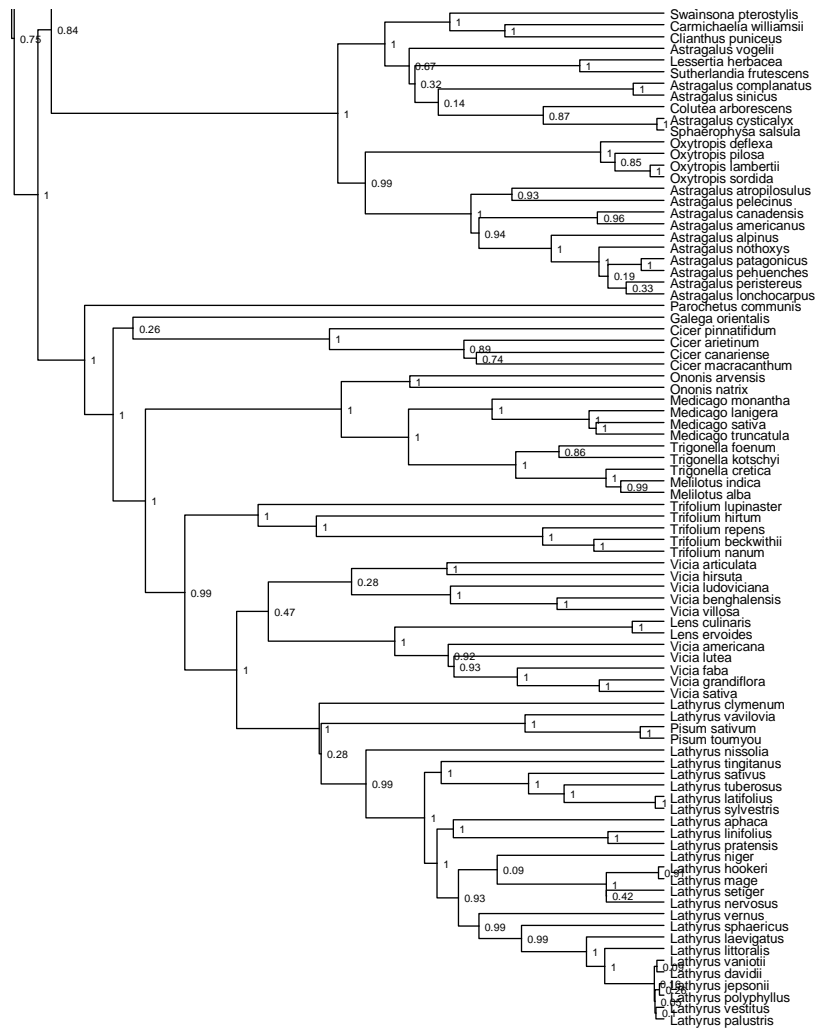

10.0



Fig. S2a (cont.)

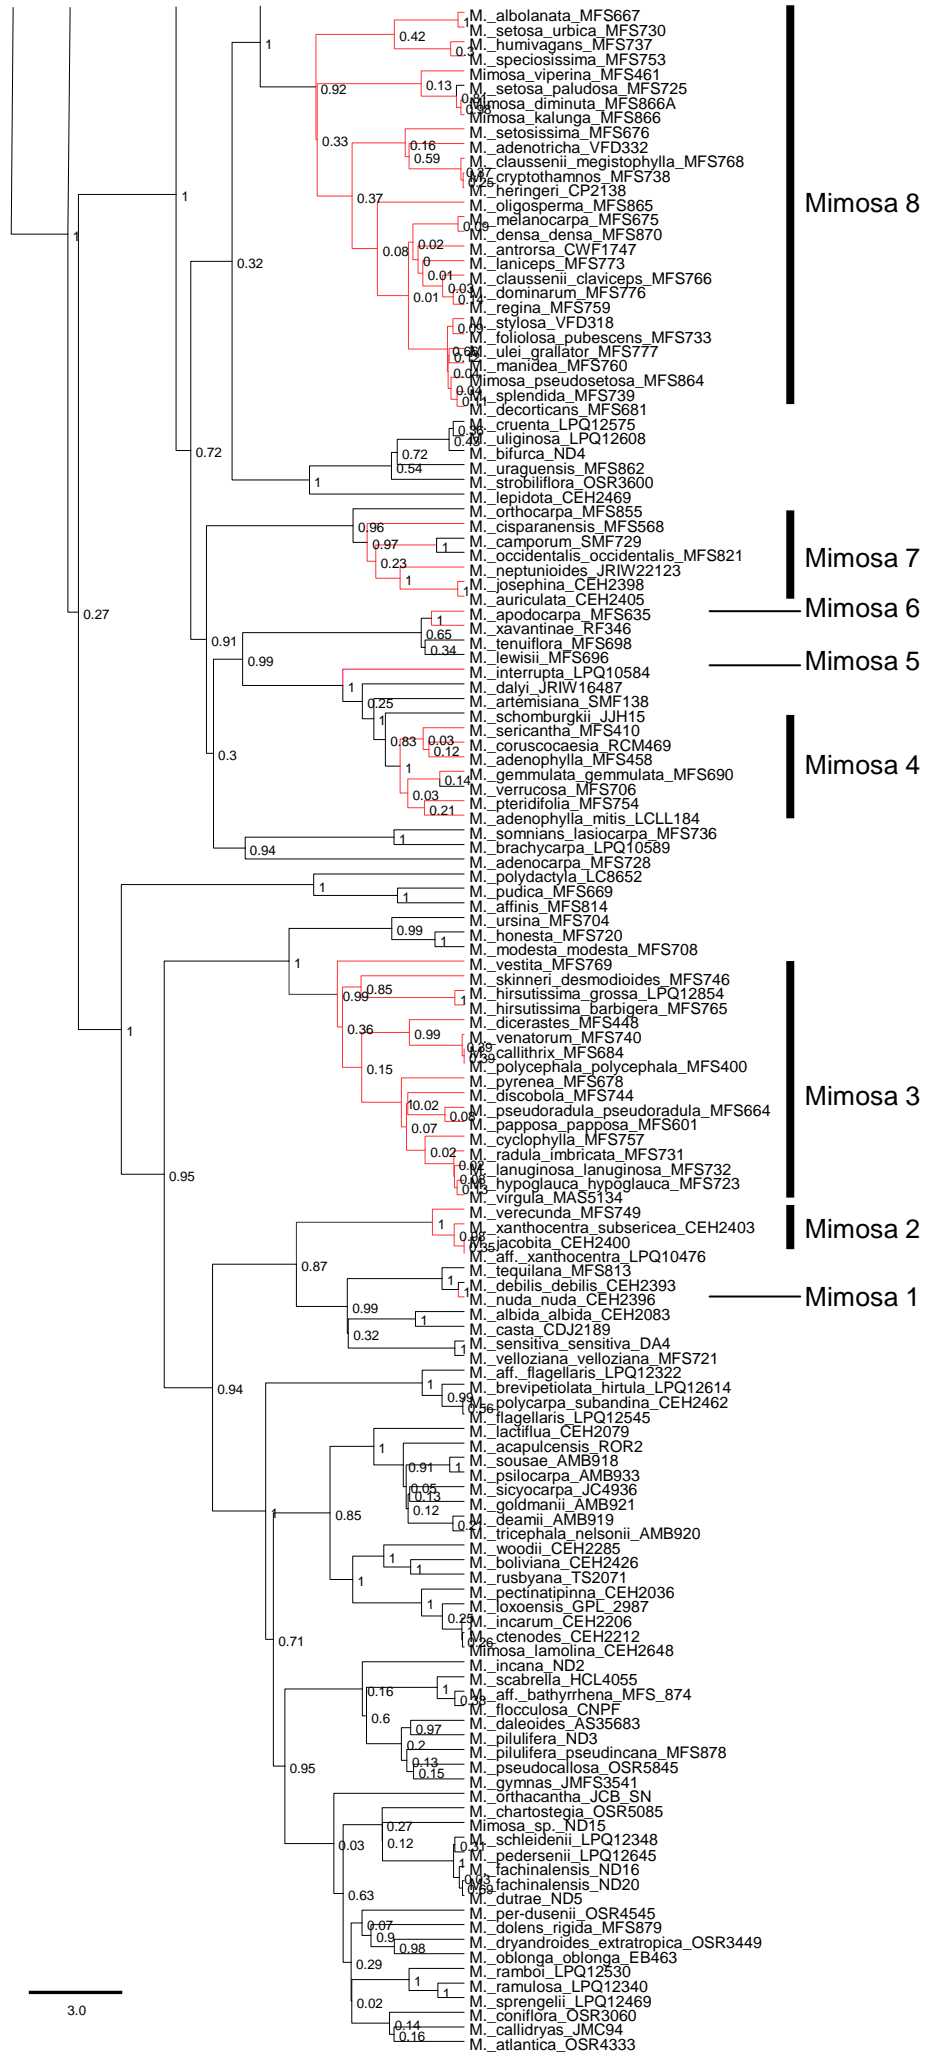

Fig. S2b

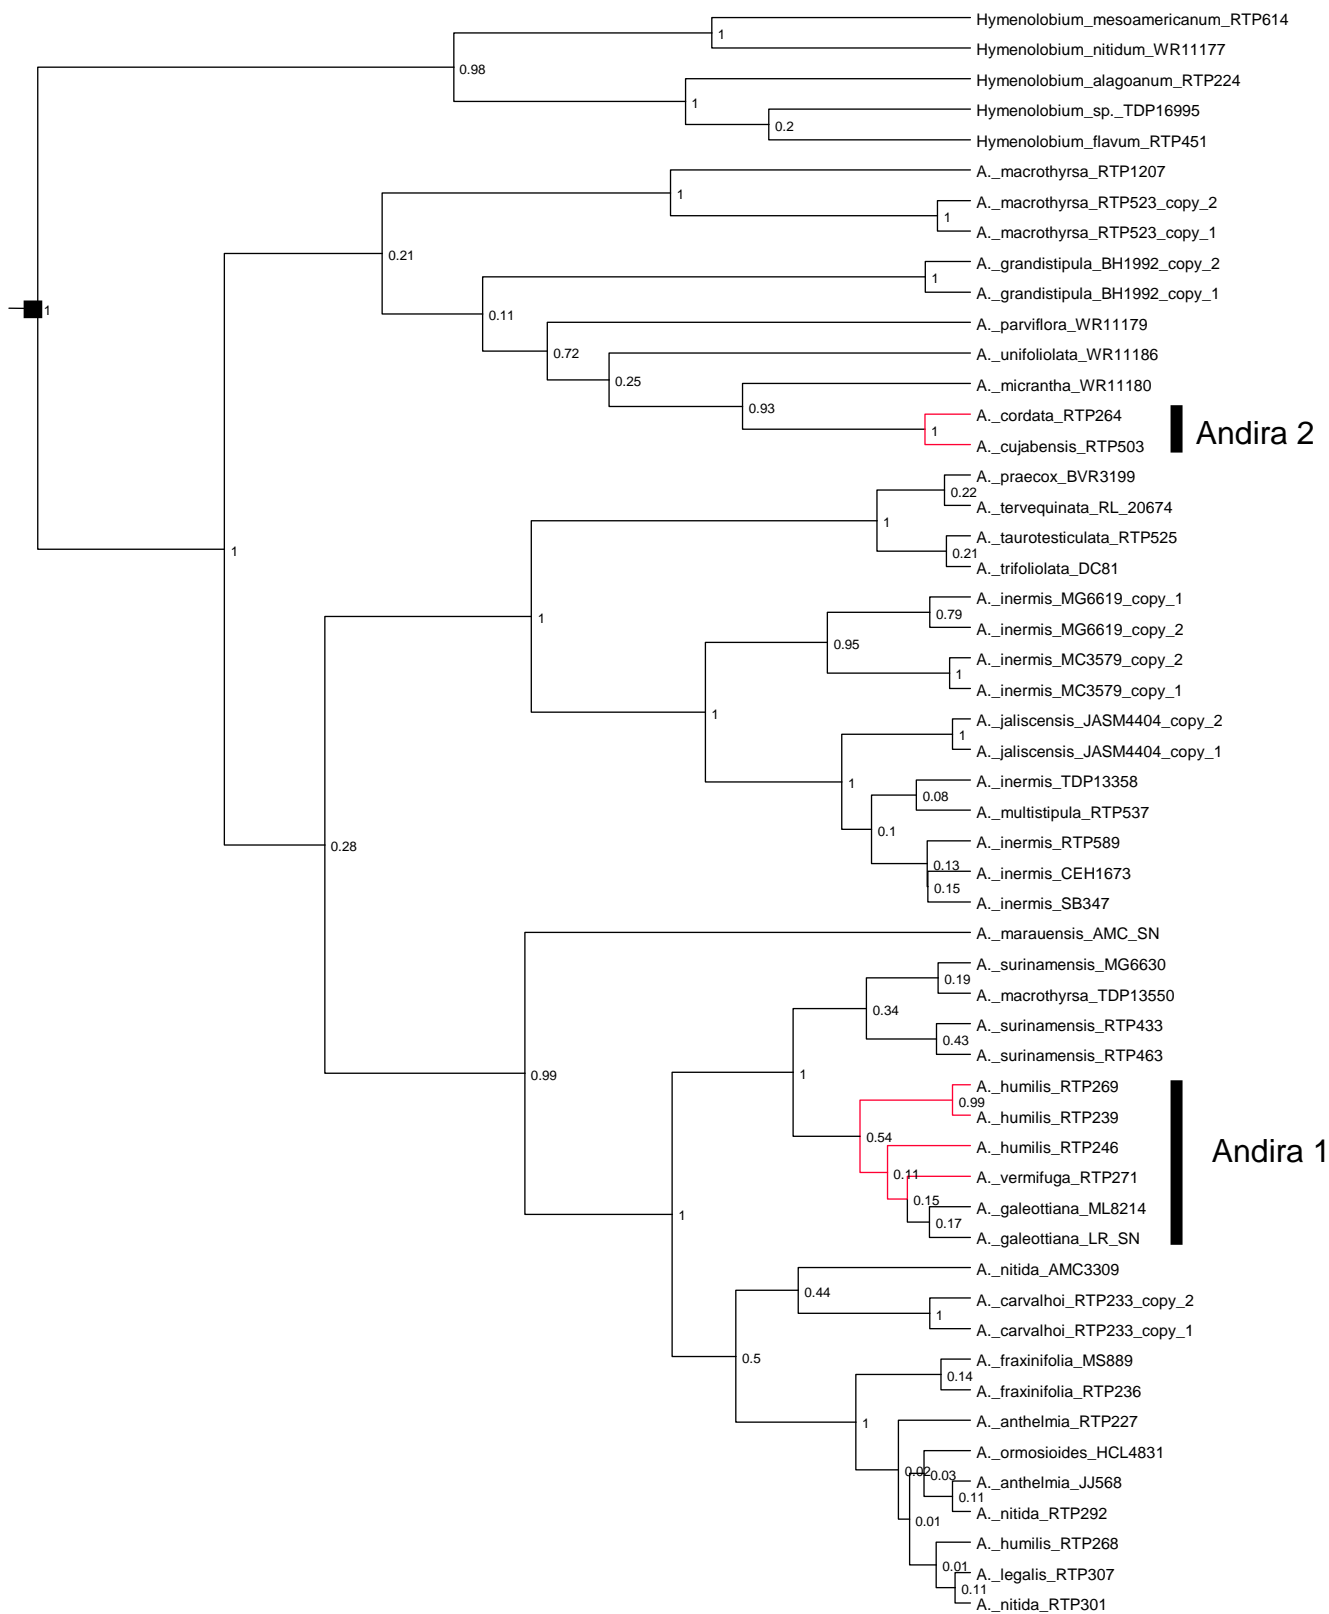



Fig. S2d

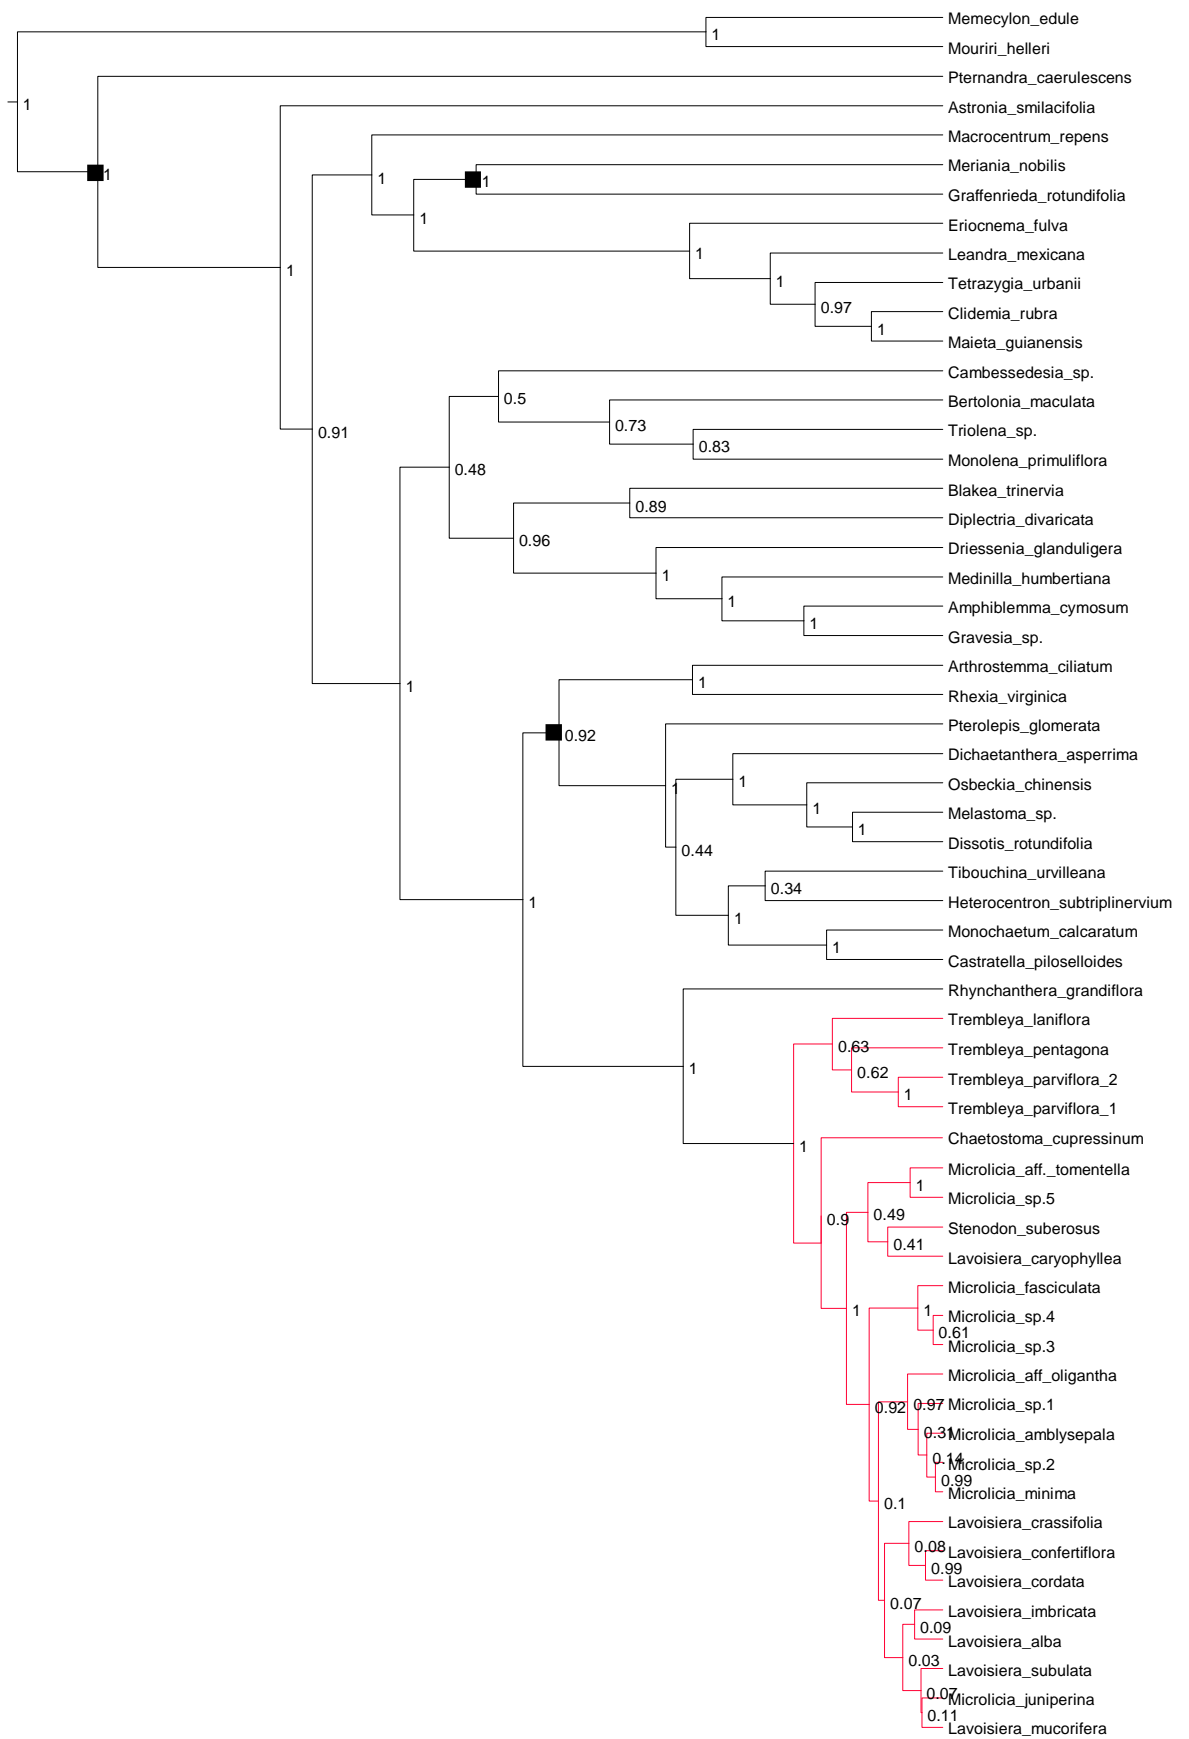



Fig. S3b

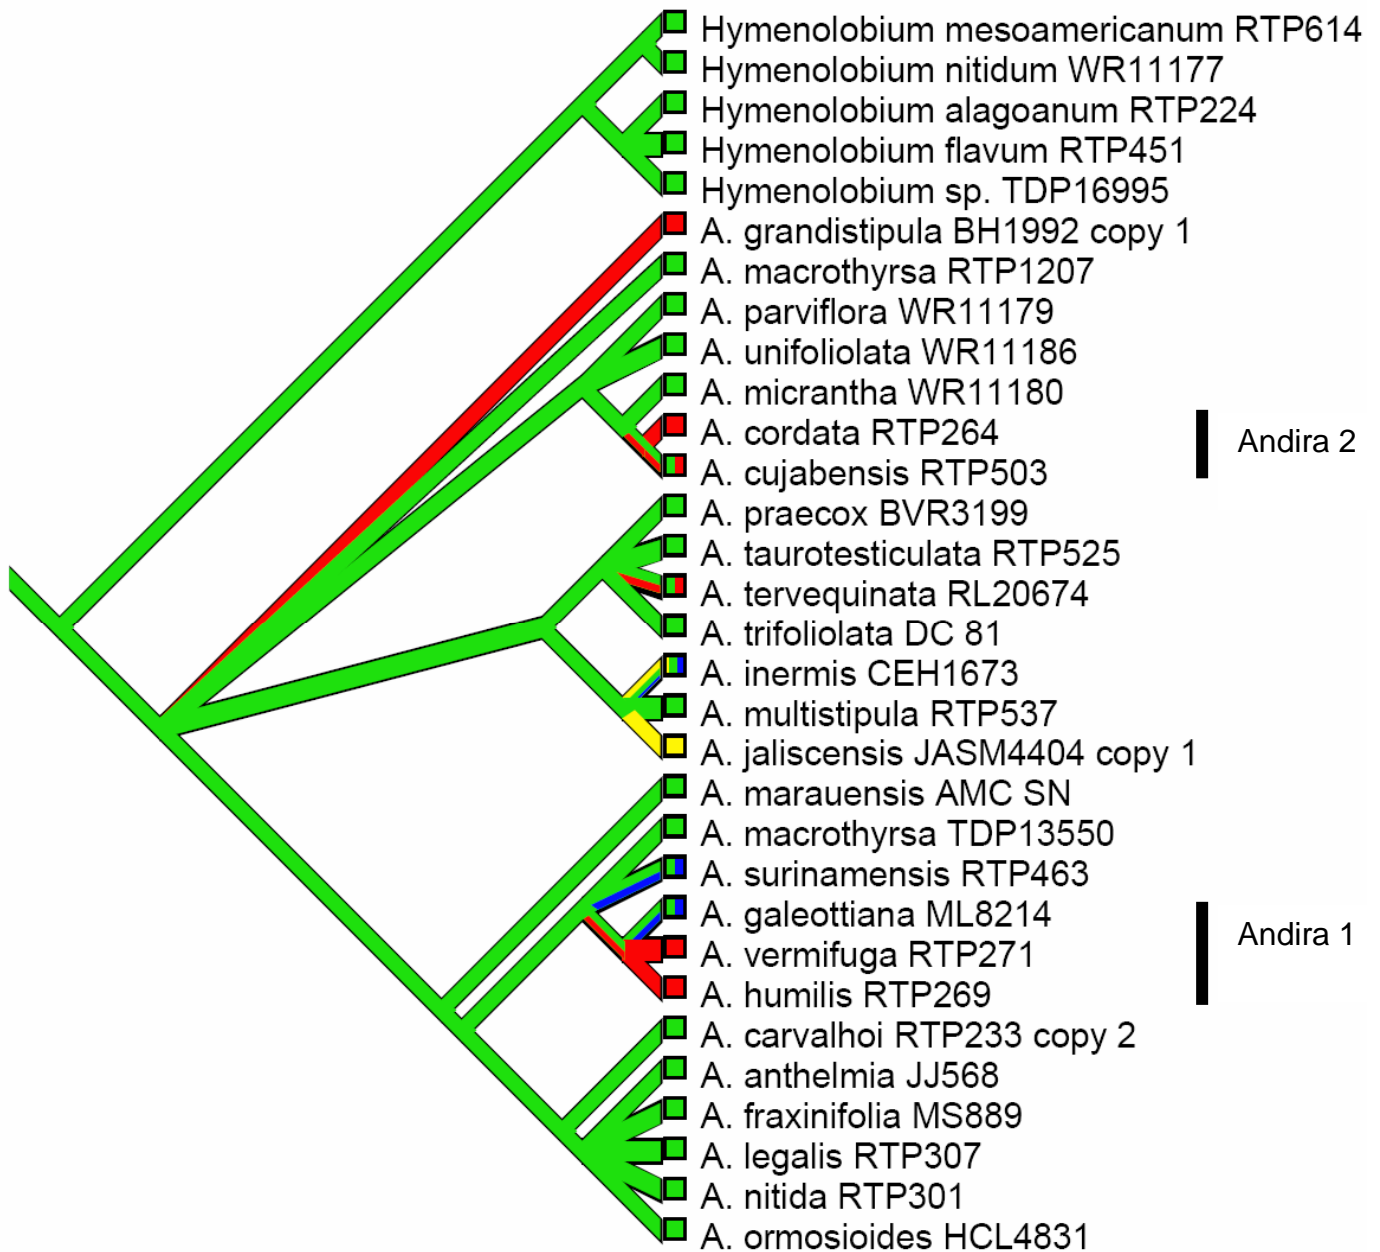



Fig. S3c

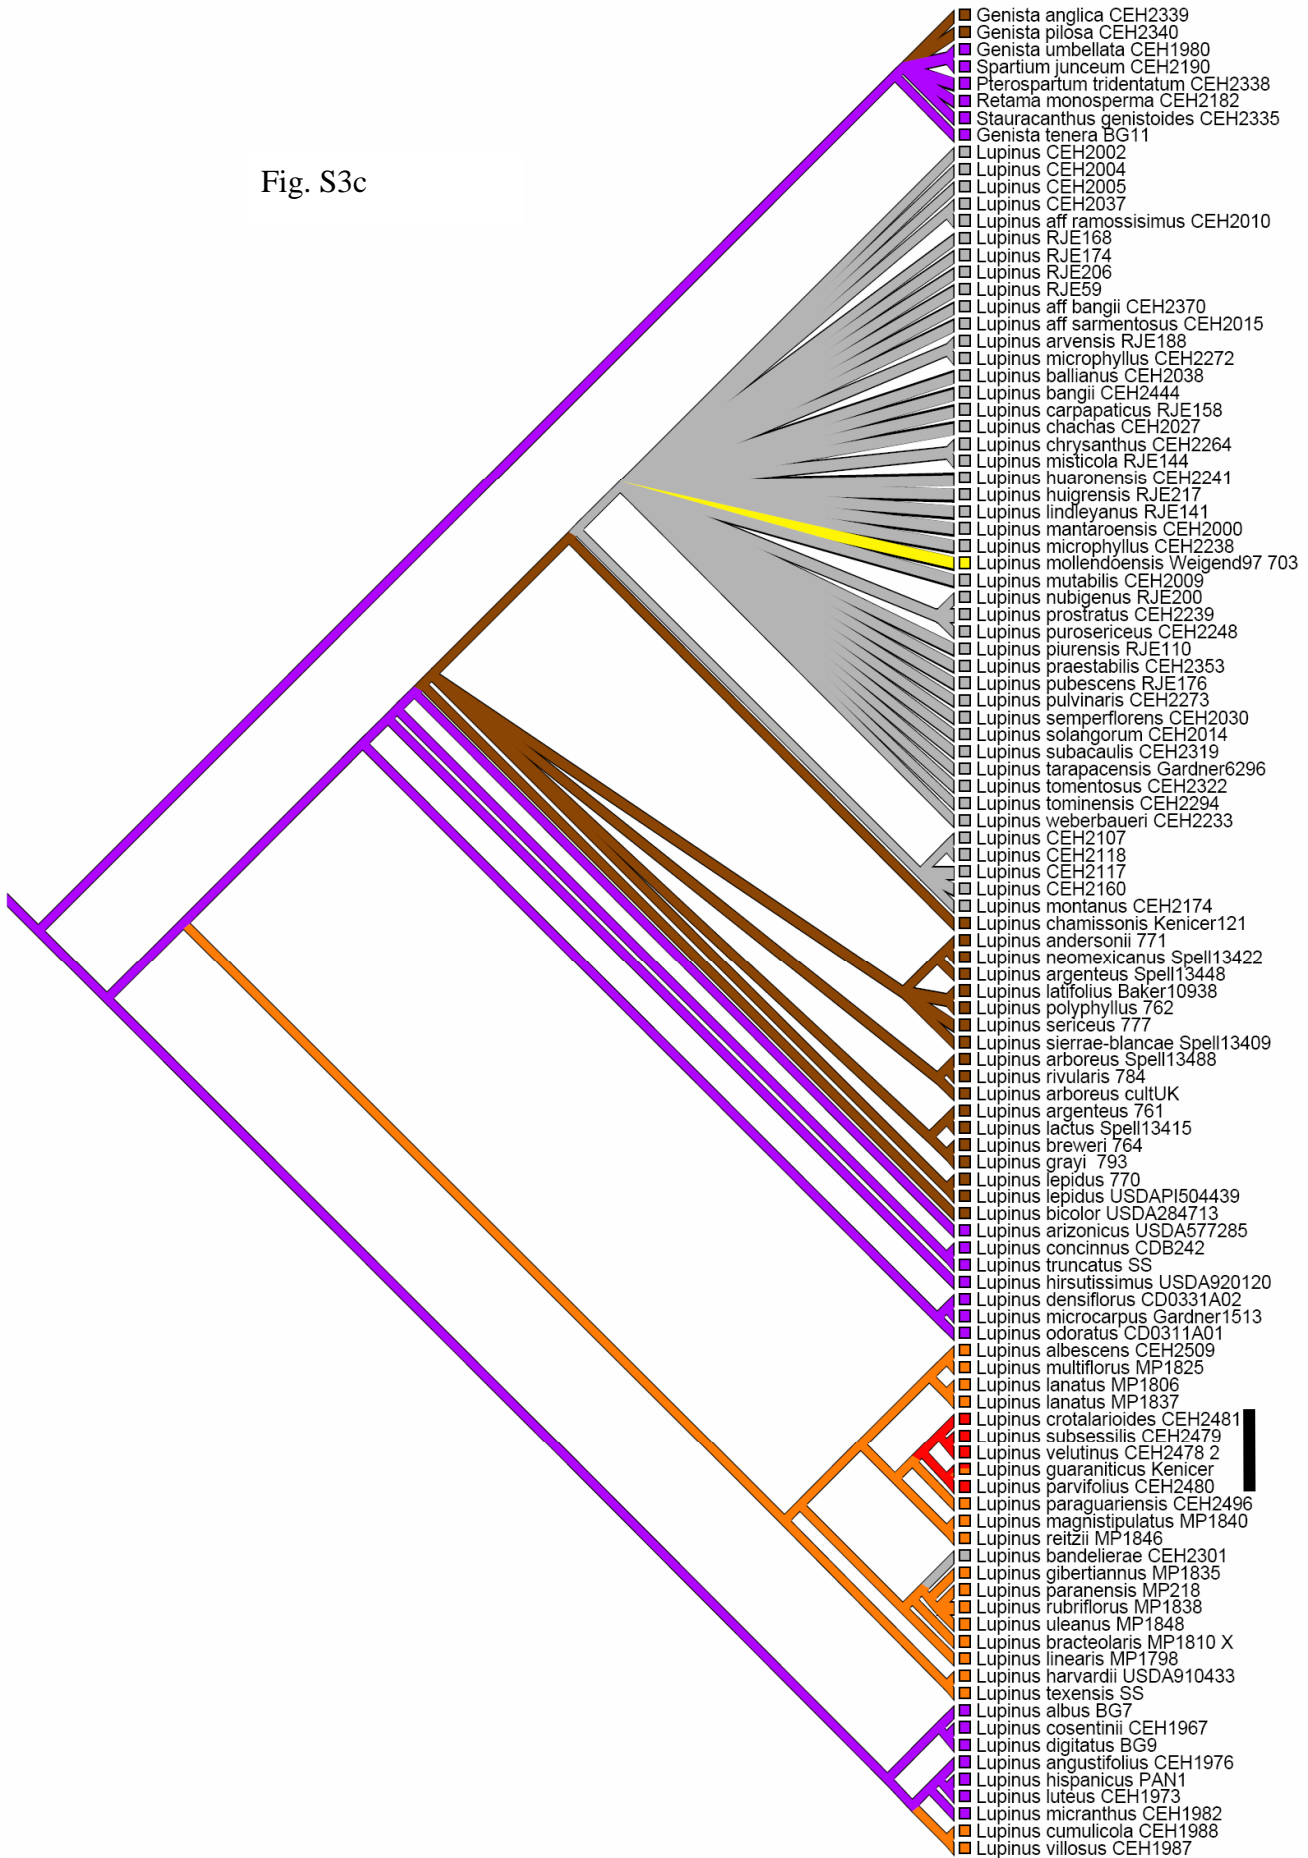

Fig. S3d

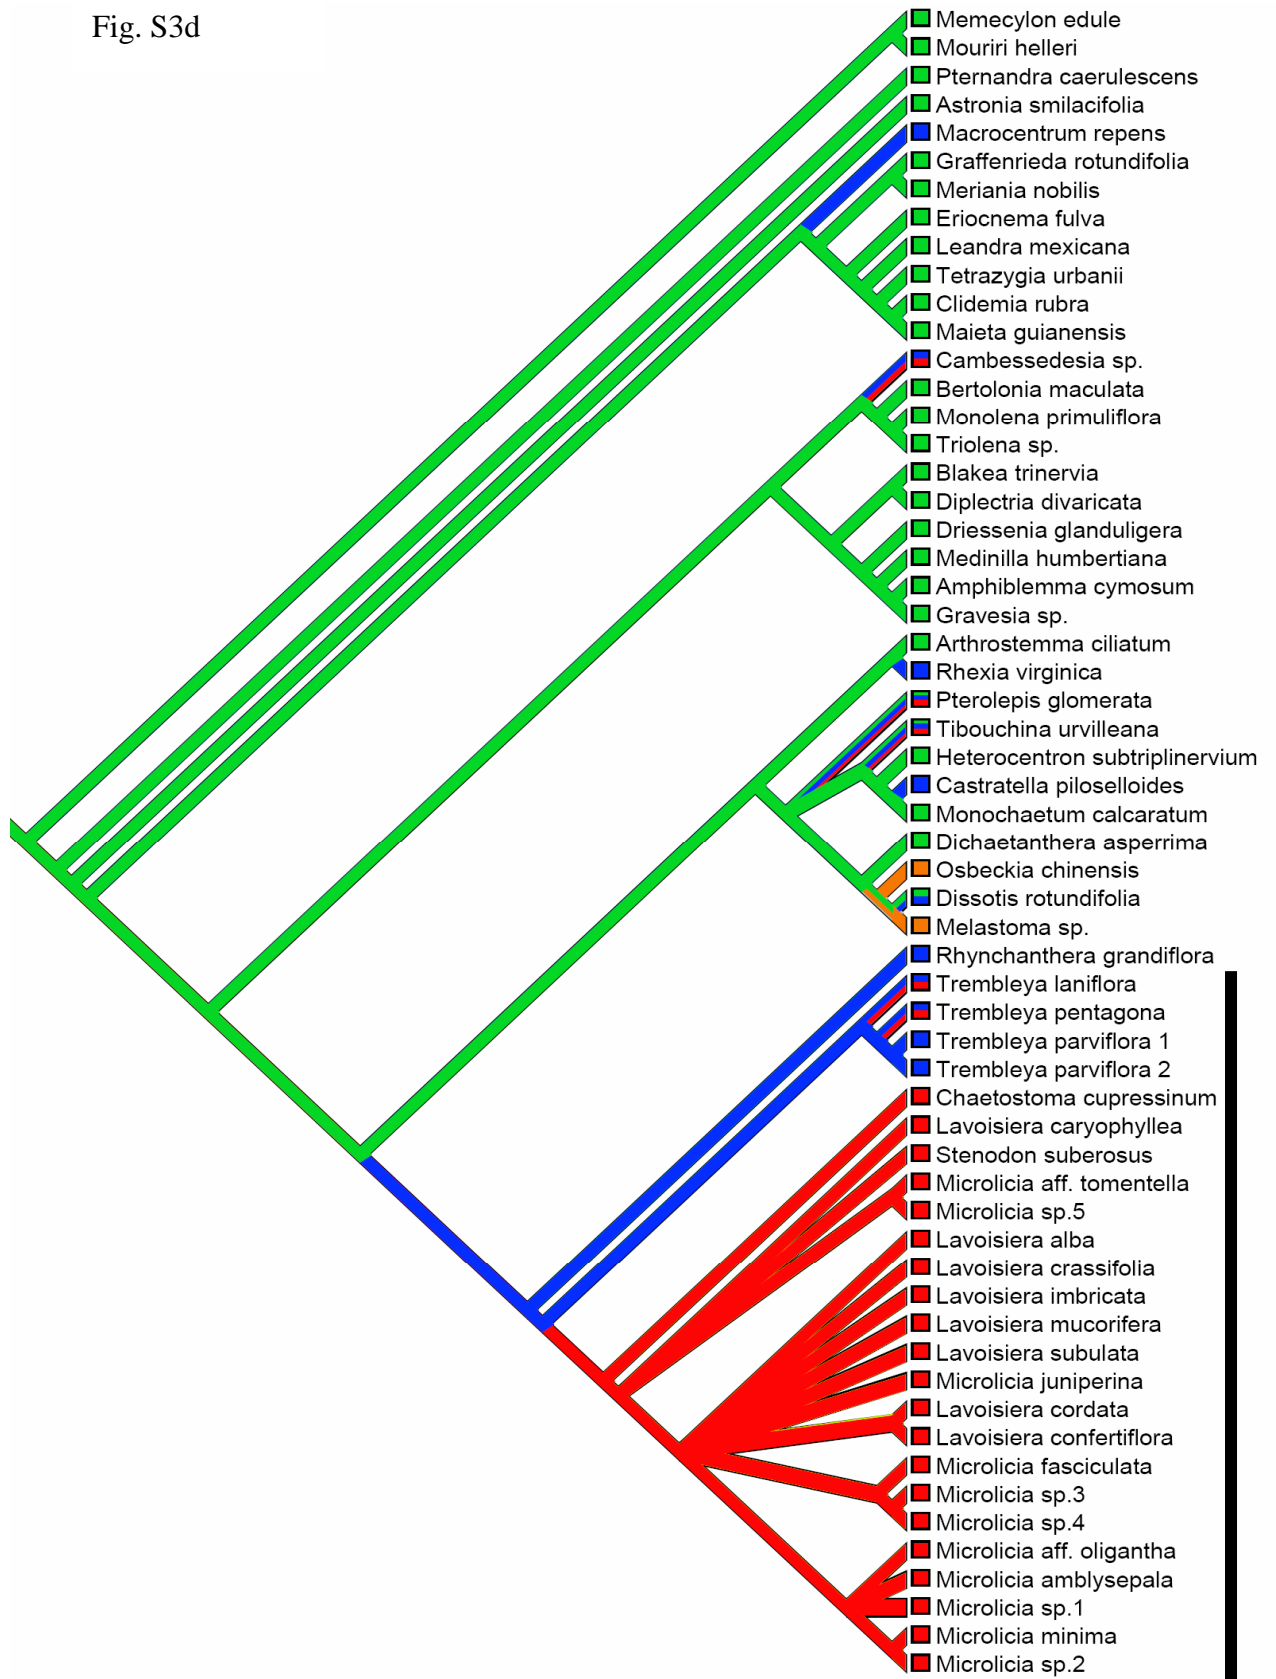



Fig. S4b

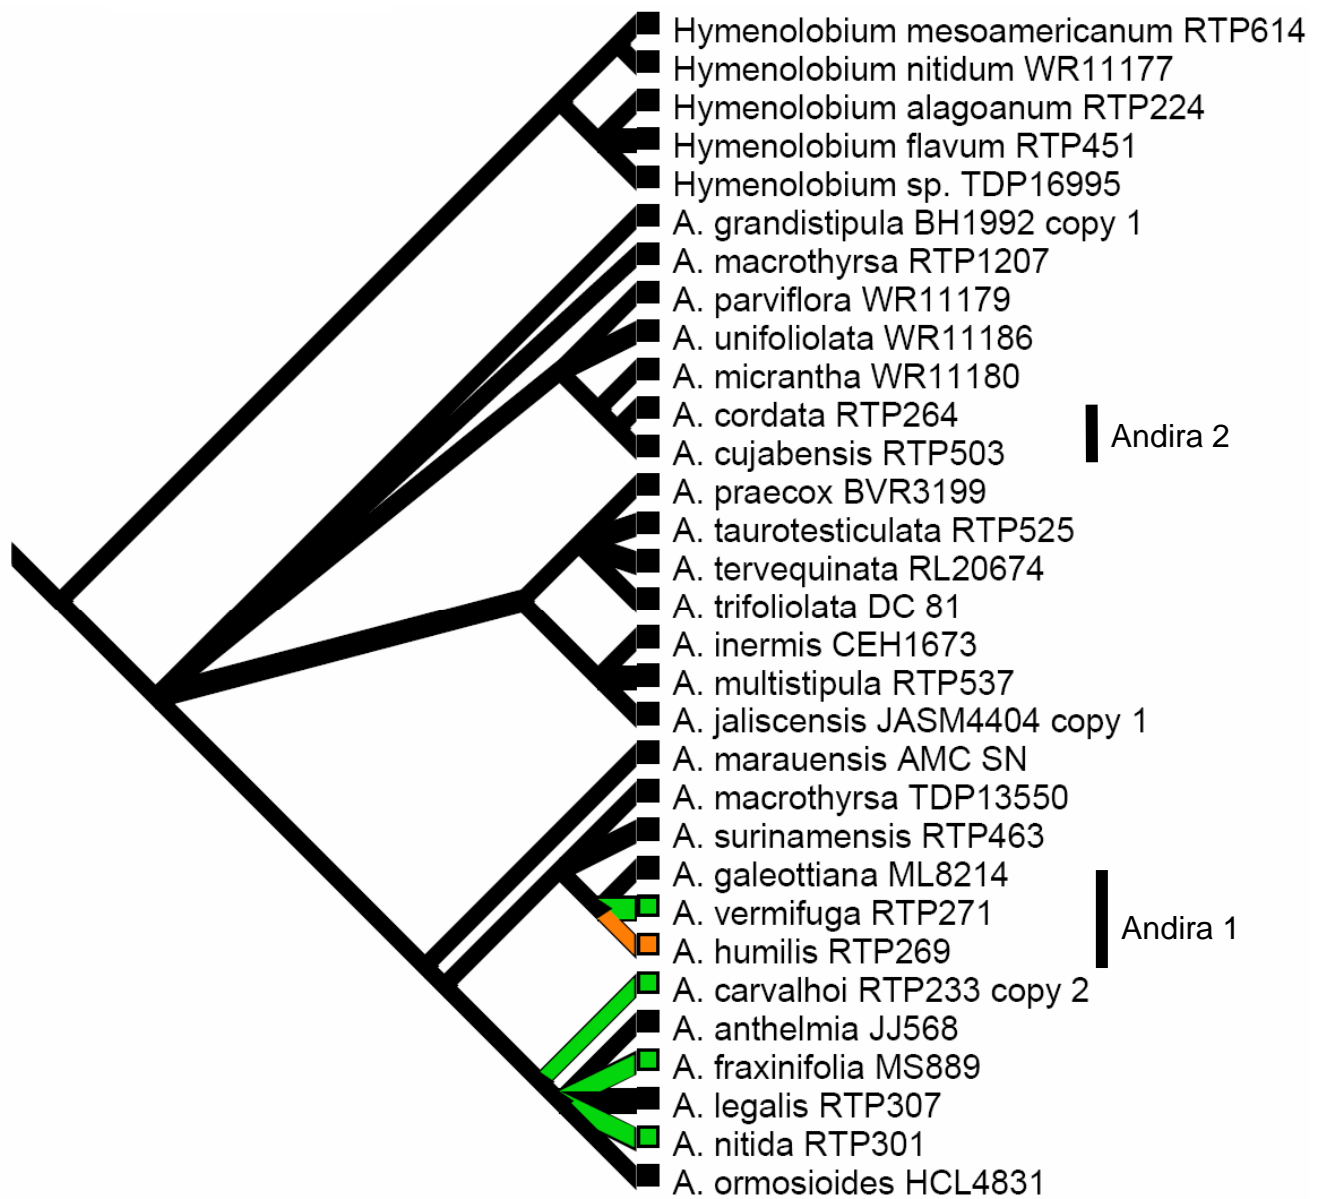

Fig. S4c

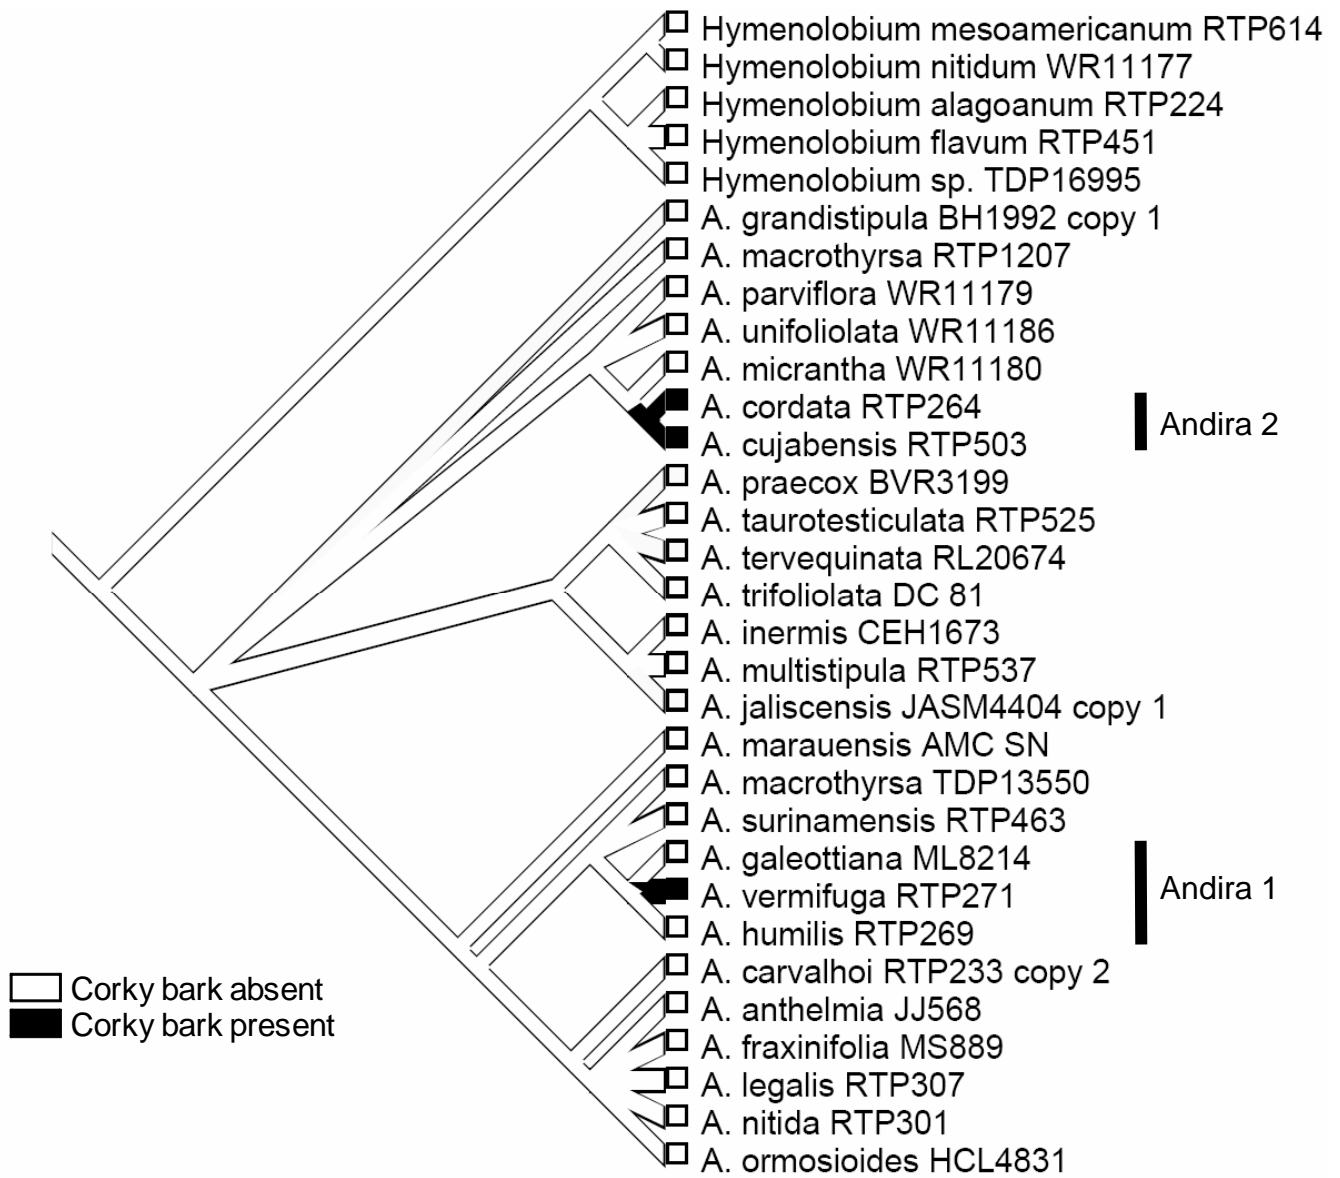

Supplement: 0903410106_Appendix_PDF.pdf [file 0903410106_Appendix_PDF.pdf]
